# Supplementary material
Source: HighWire-hosted journal article supplement (https://diabetes.diabetesjournals.org/content/suppl/2007/03/09/54.4.1191)

# BKS Chromosome 2

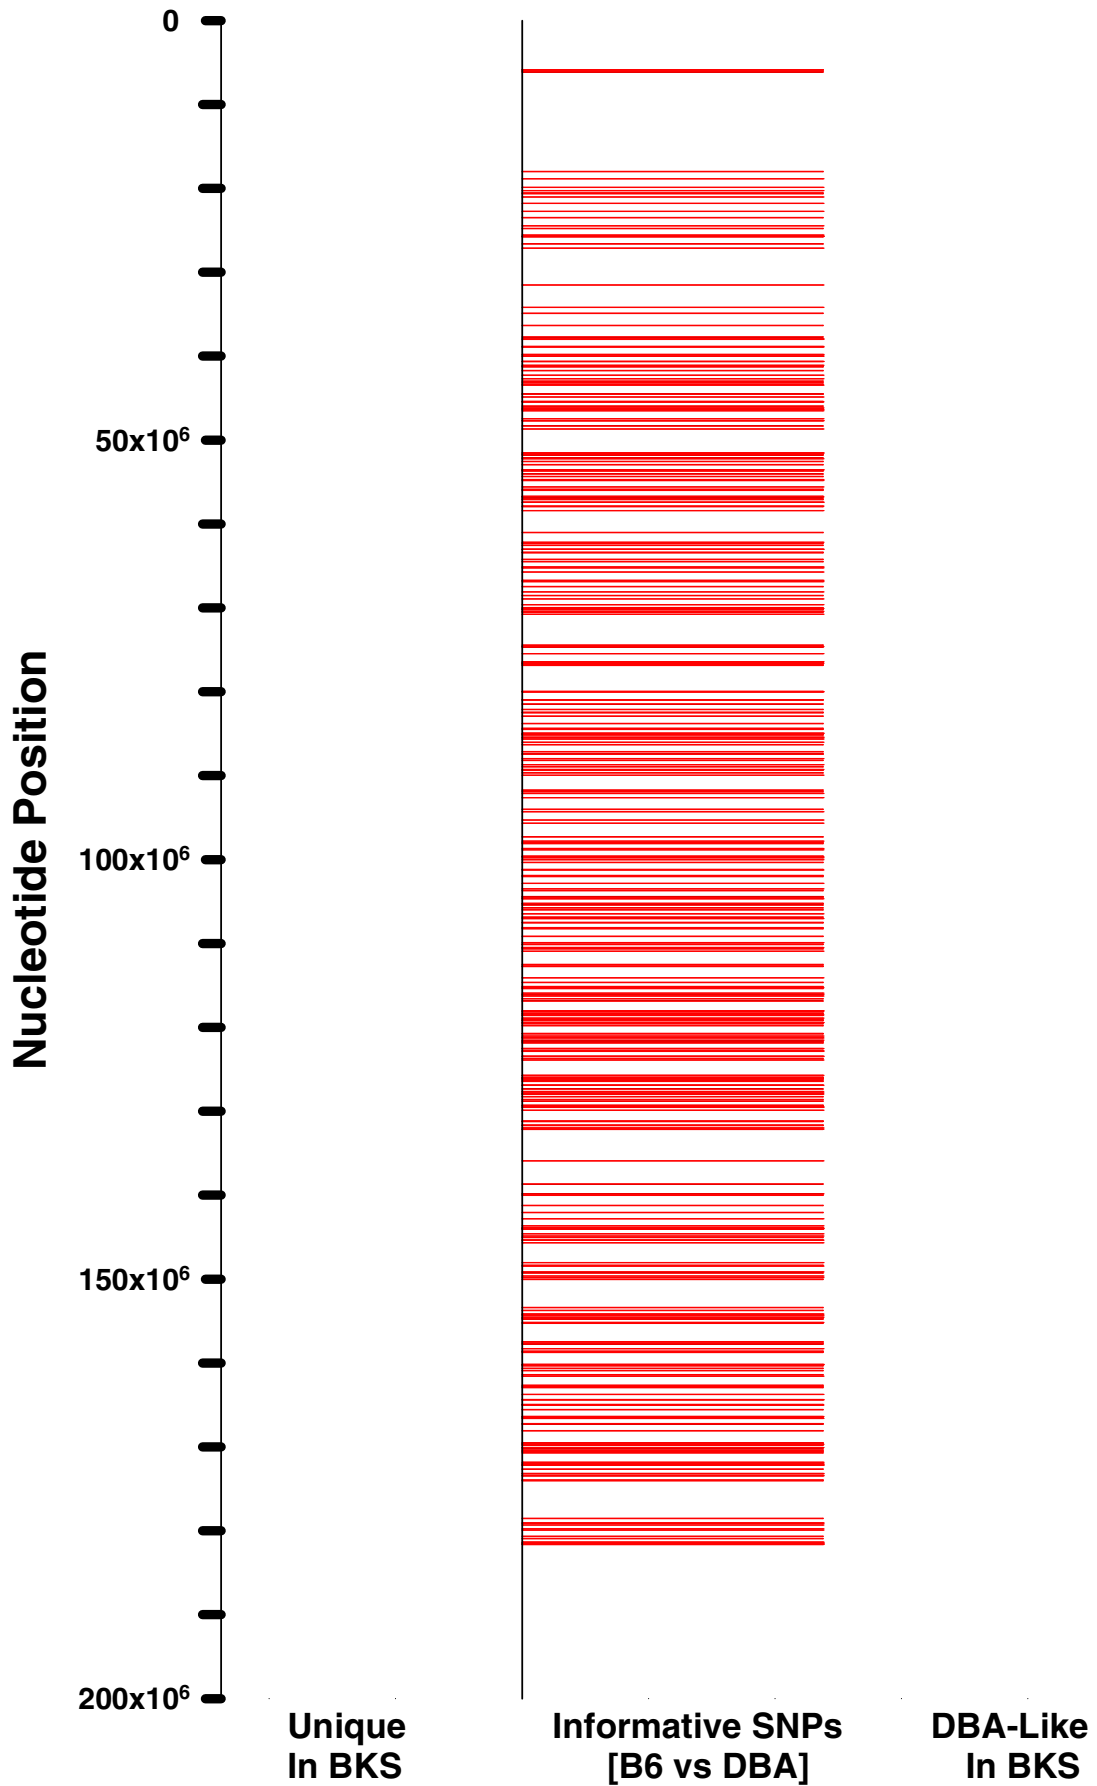

# BKS Chromosome 3

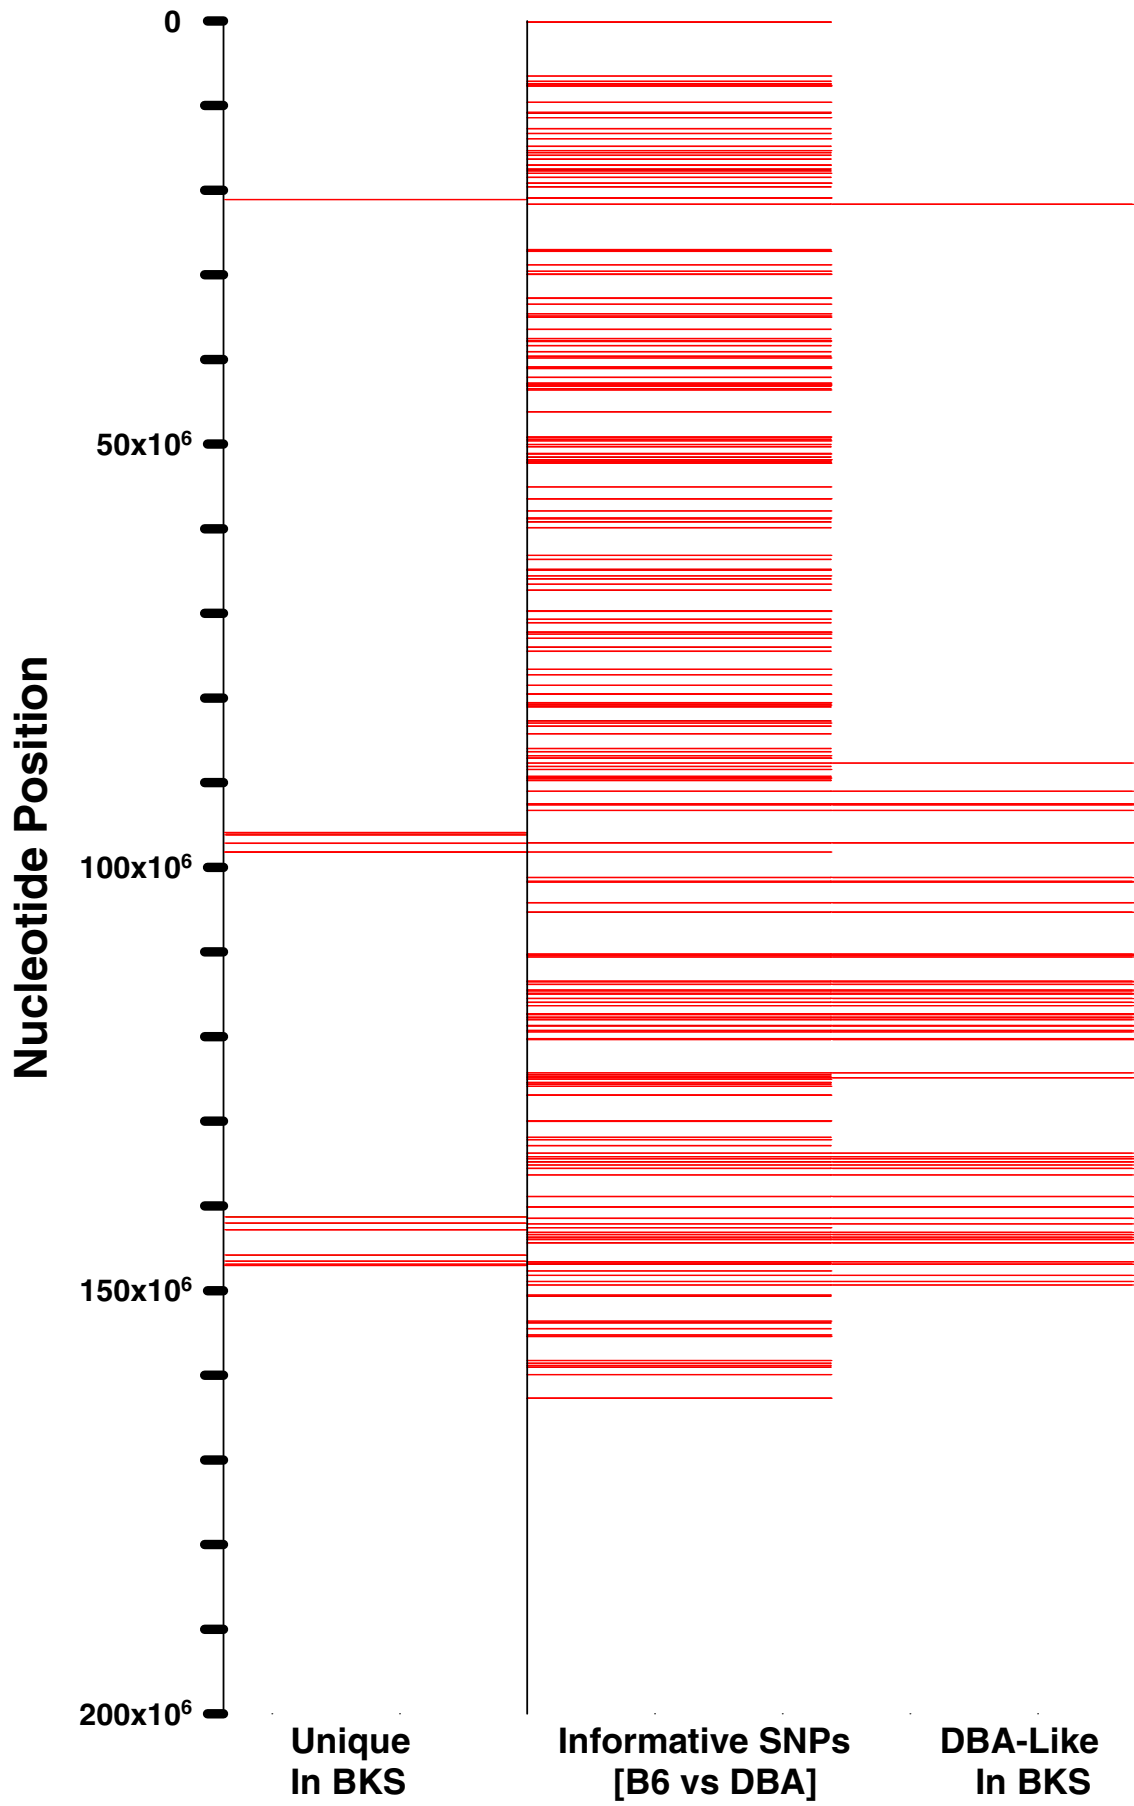

# BKS Chromosome 4

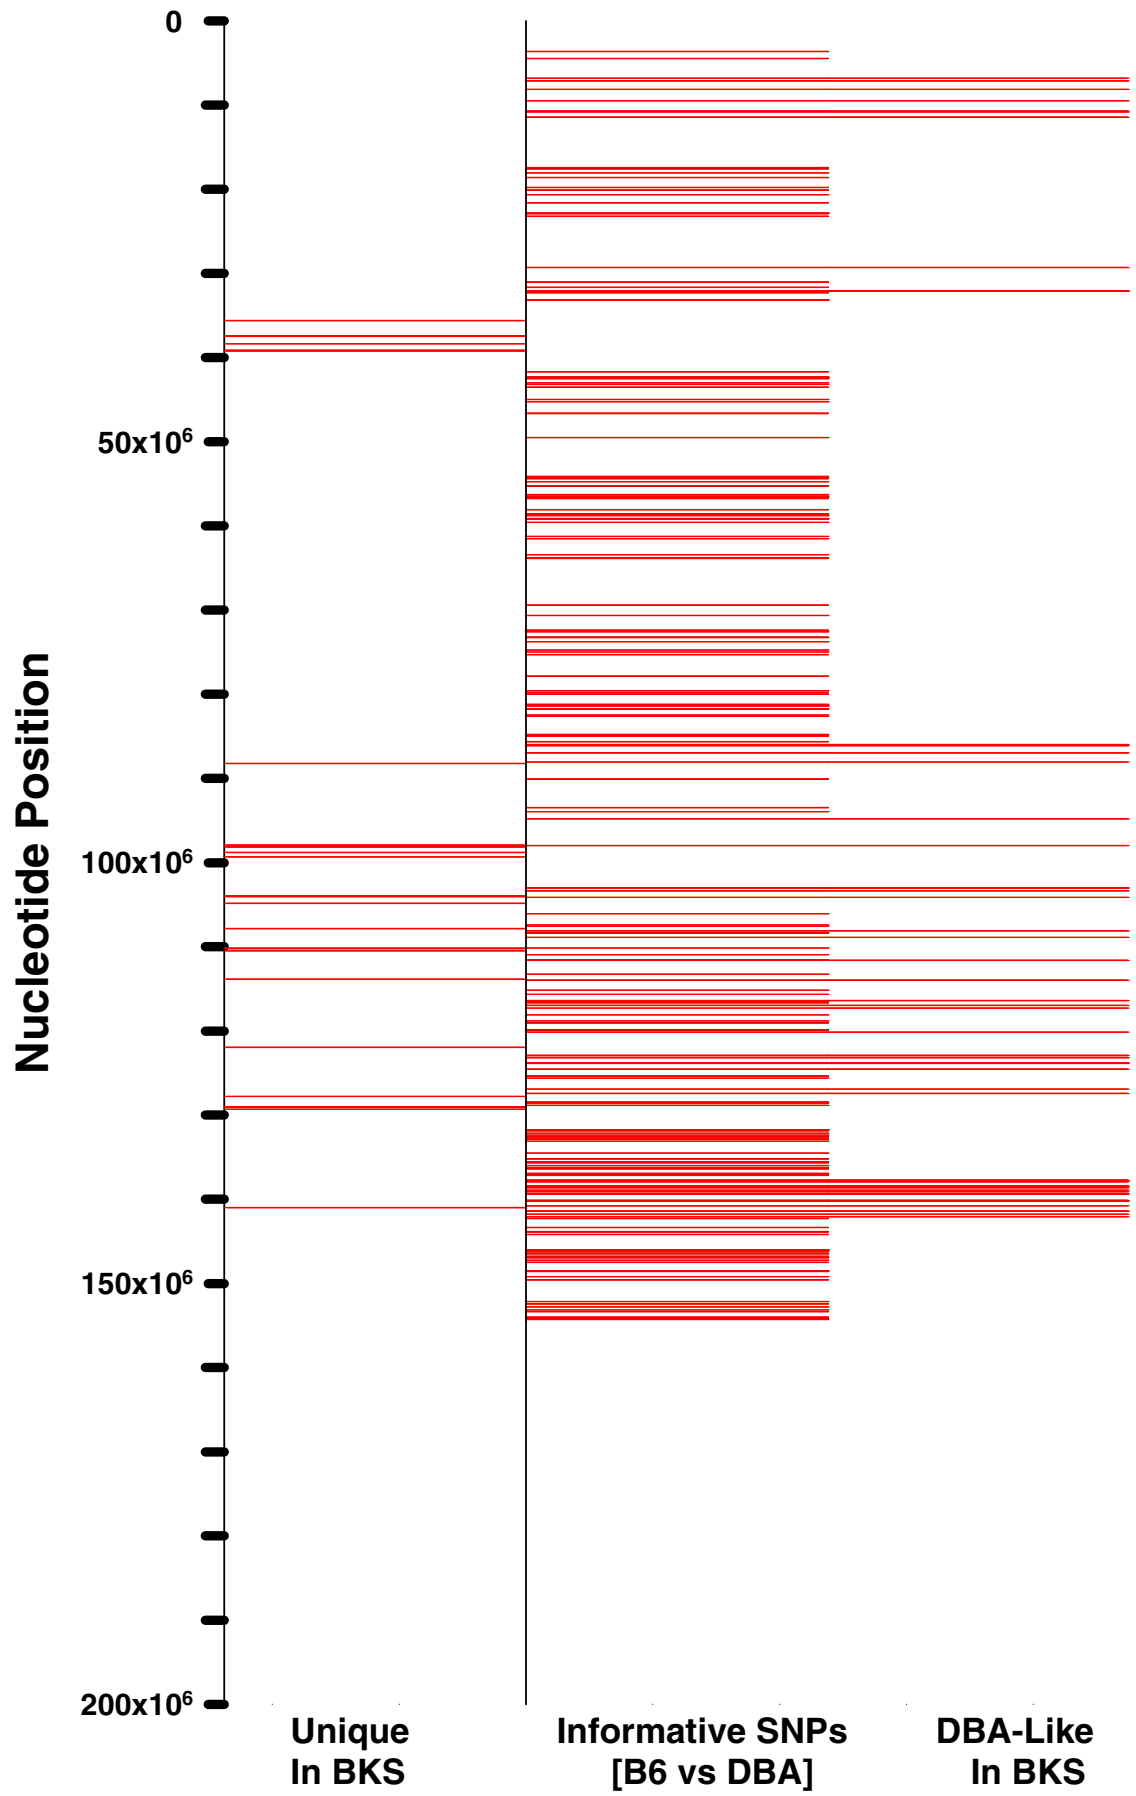

# BKS Chromosome 5

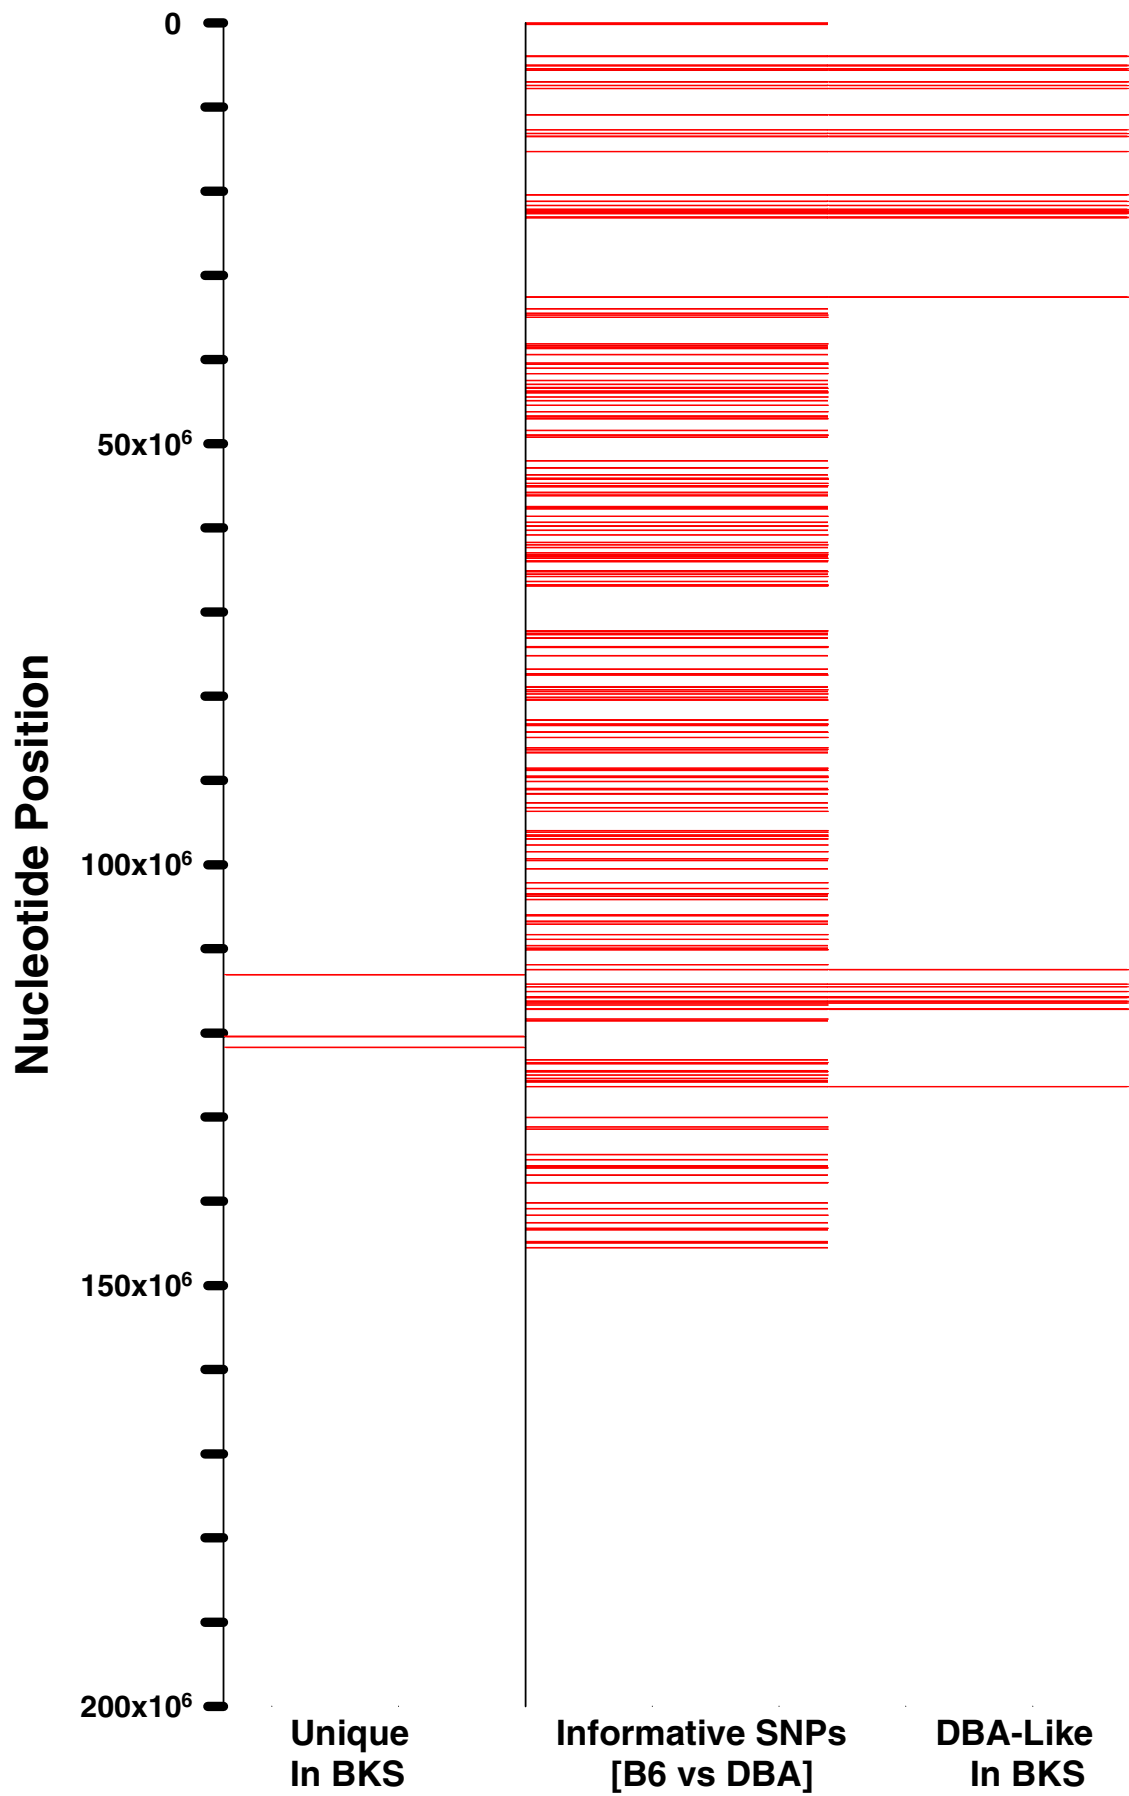

# BKS Chromosome 6

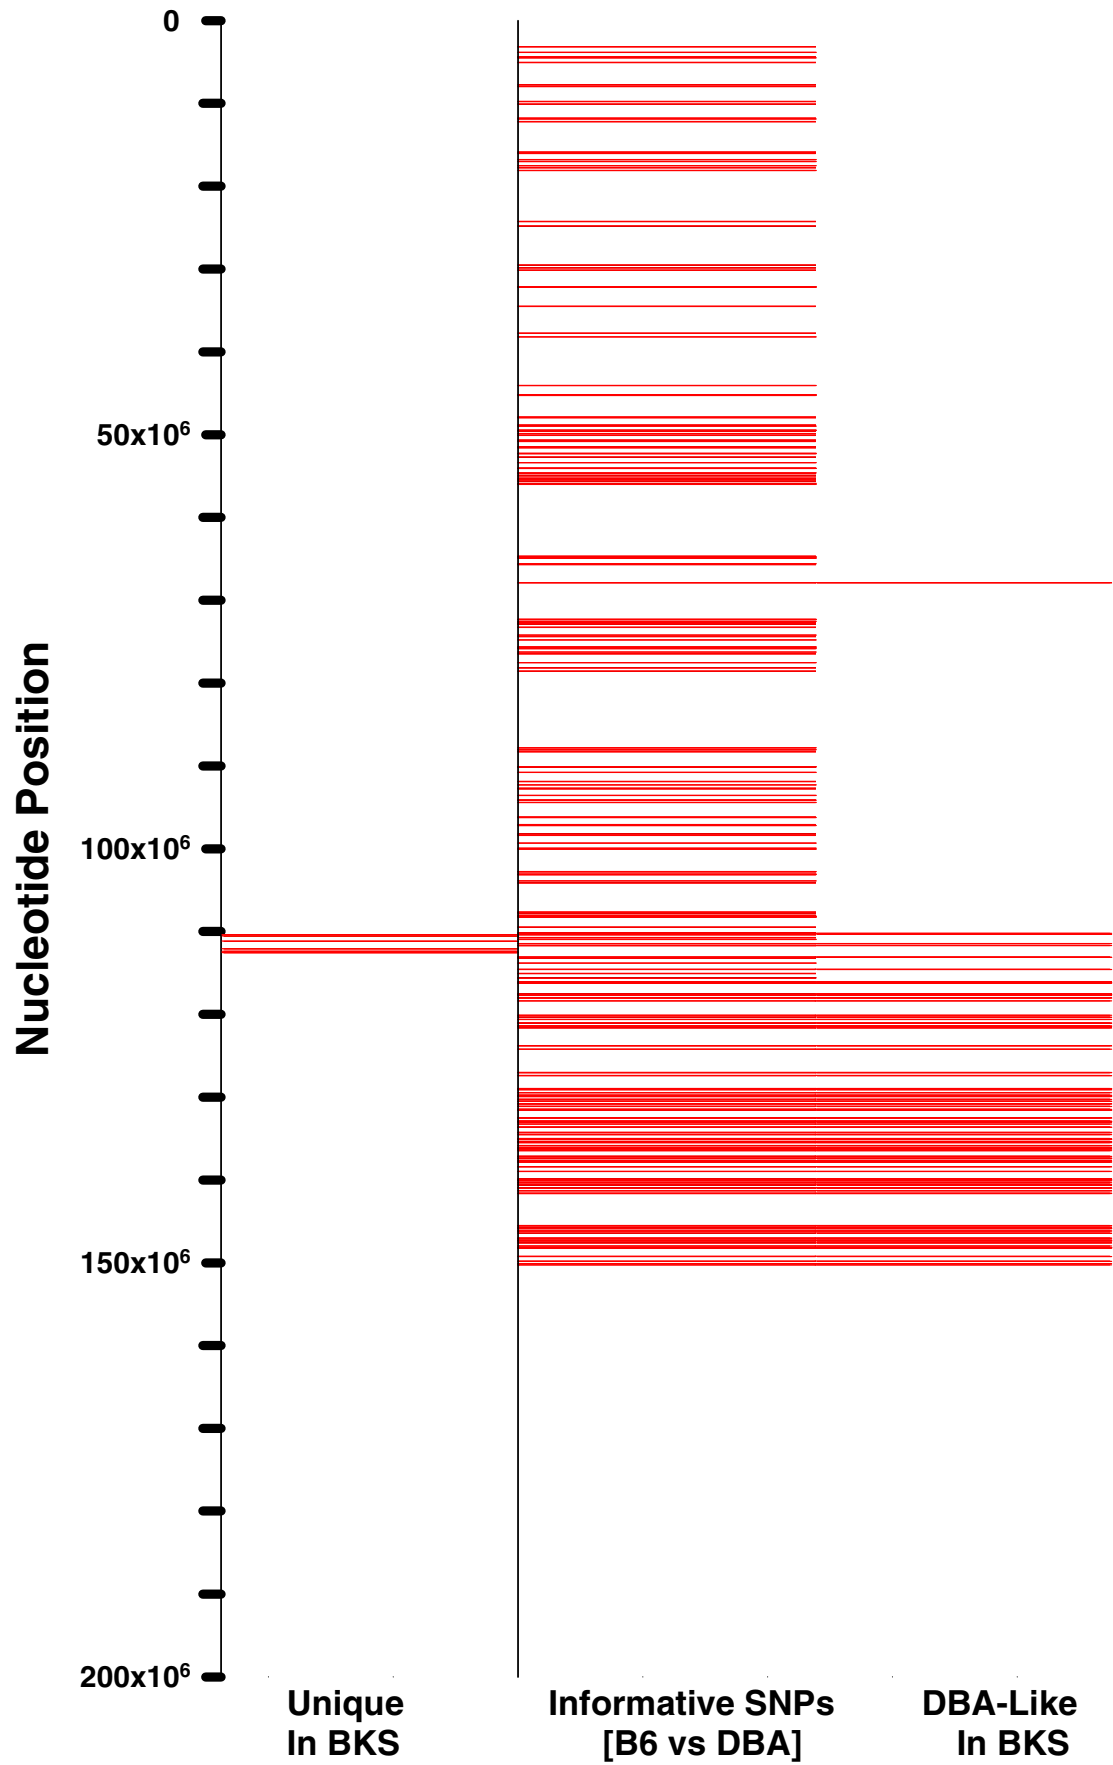

# BKS Chromosome 7

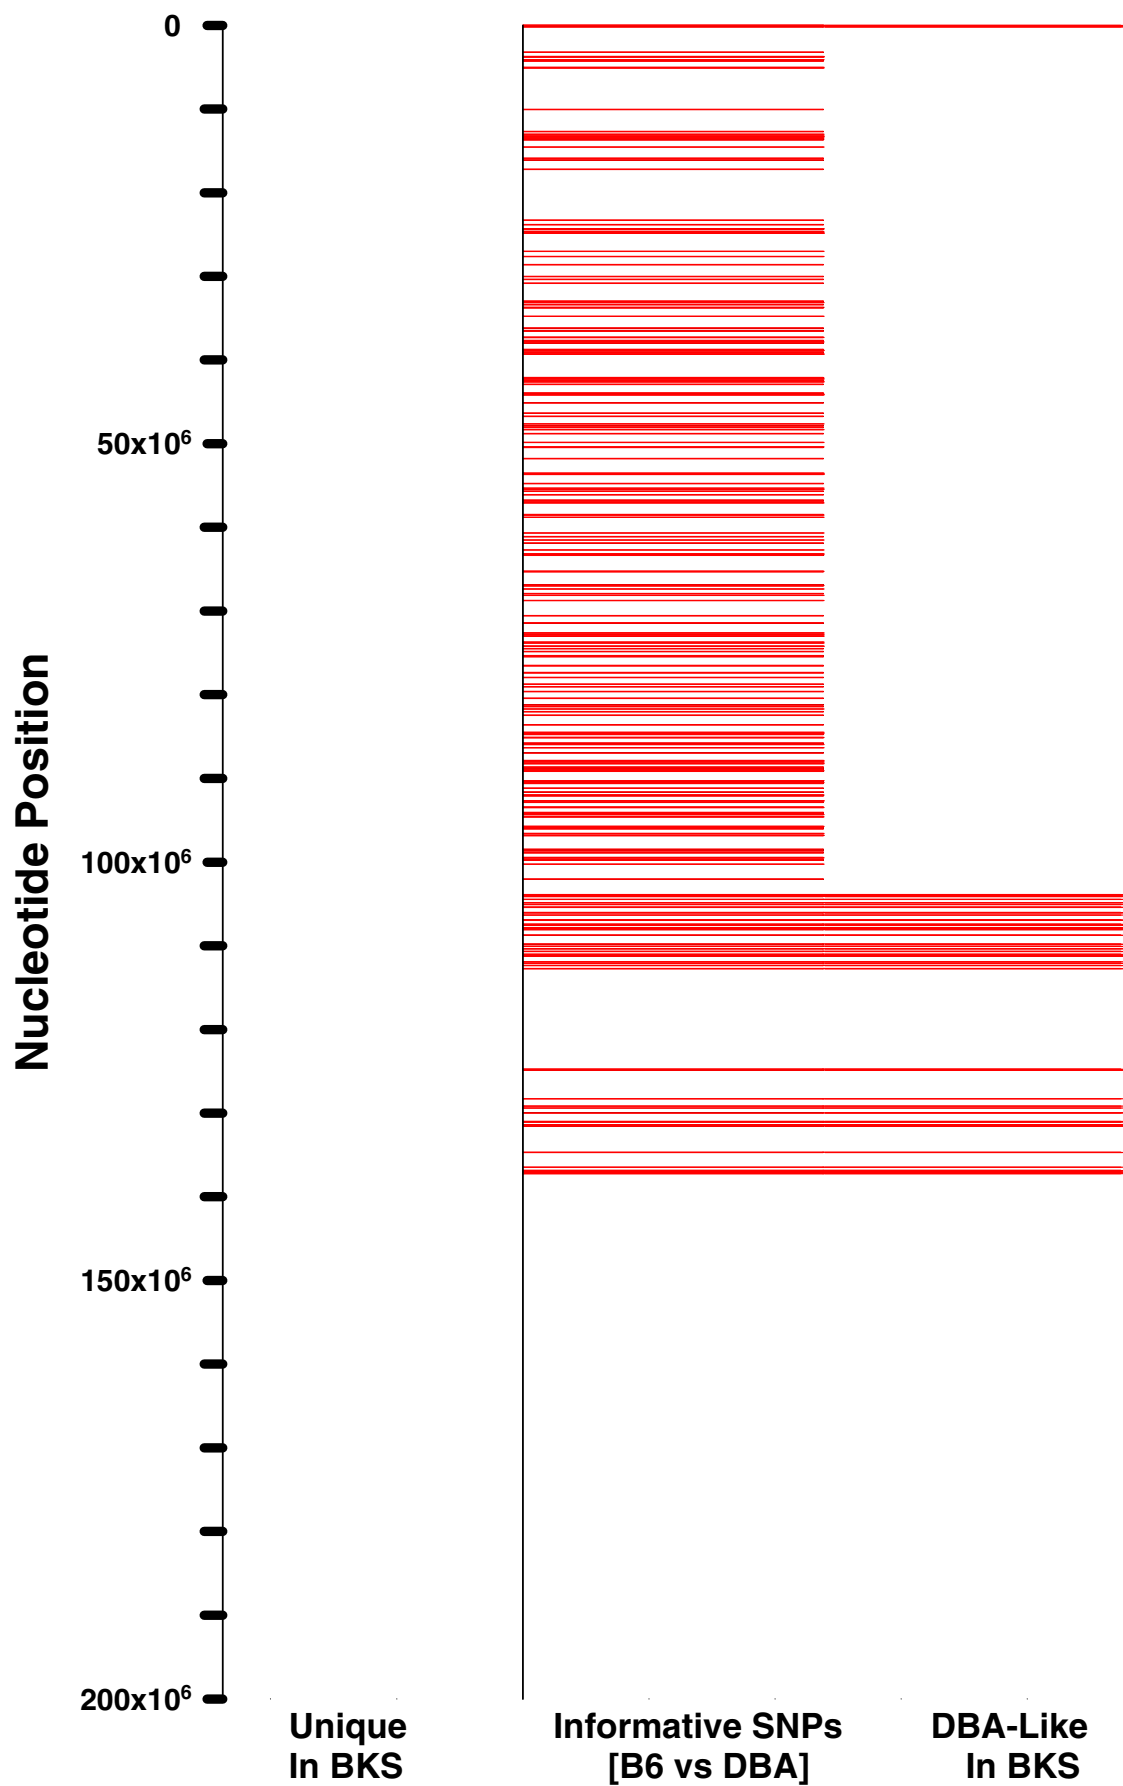

# BKS Chromosome 8

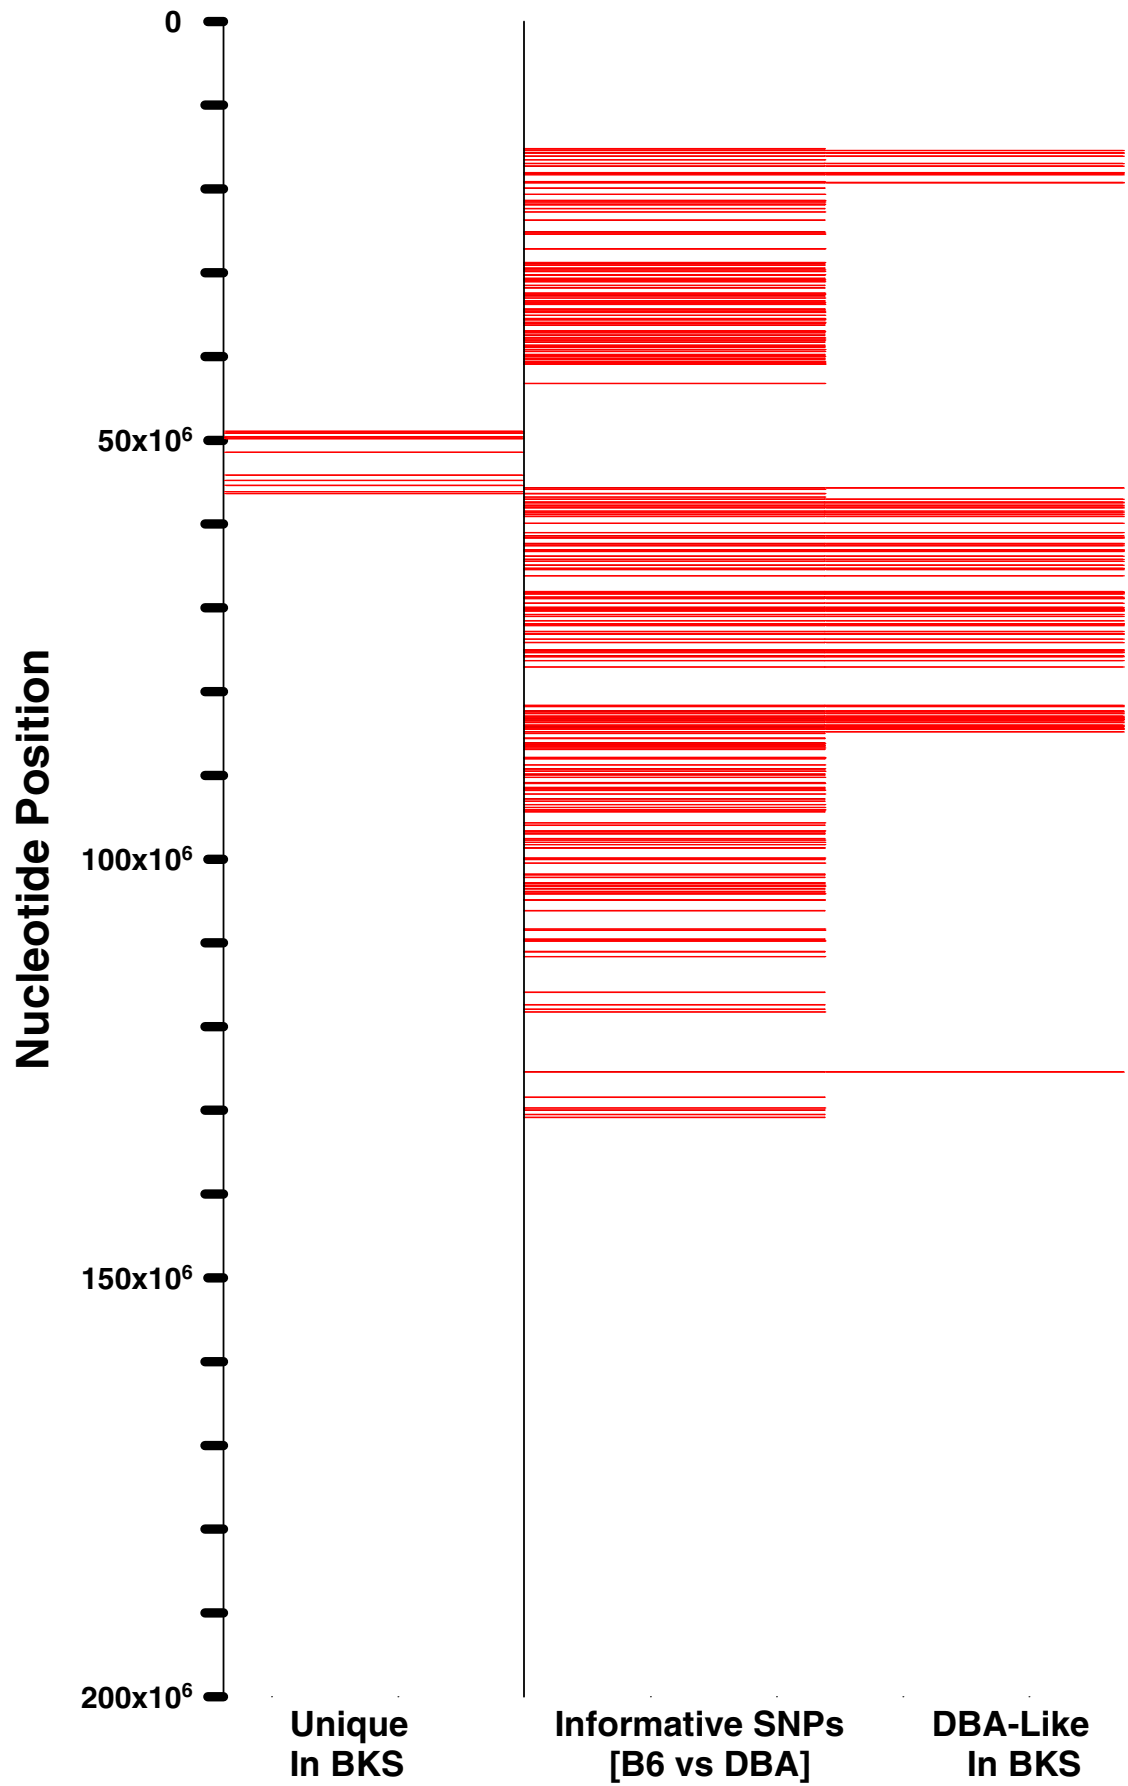

# BKS Chromosome 9

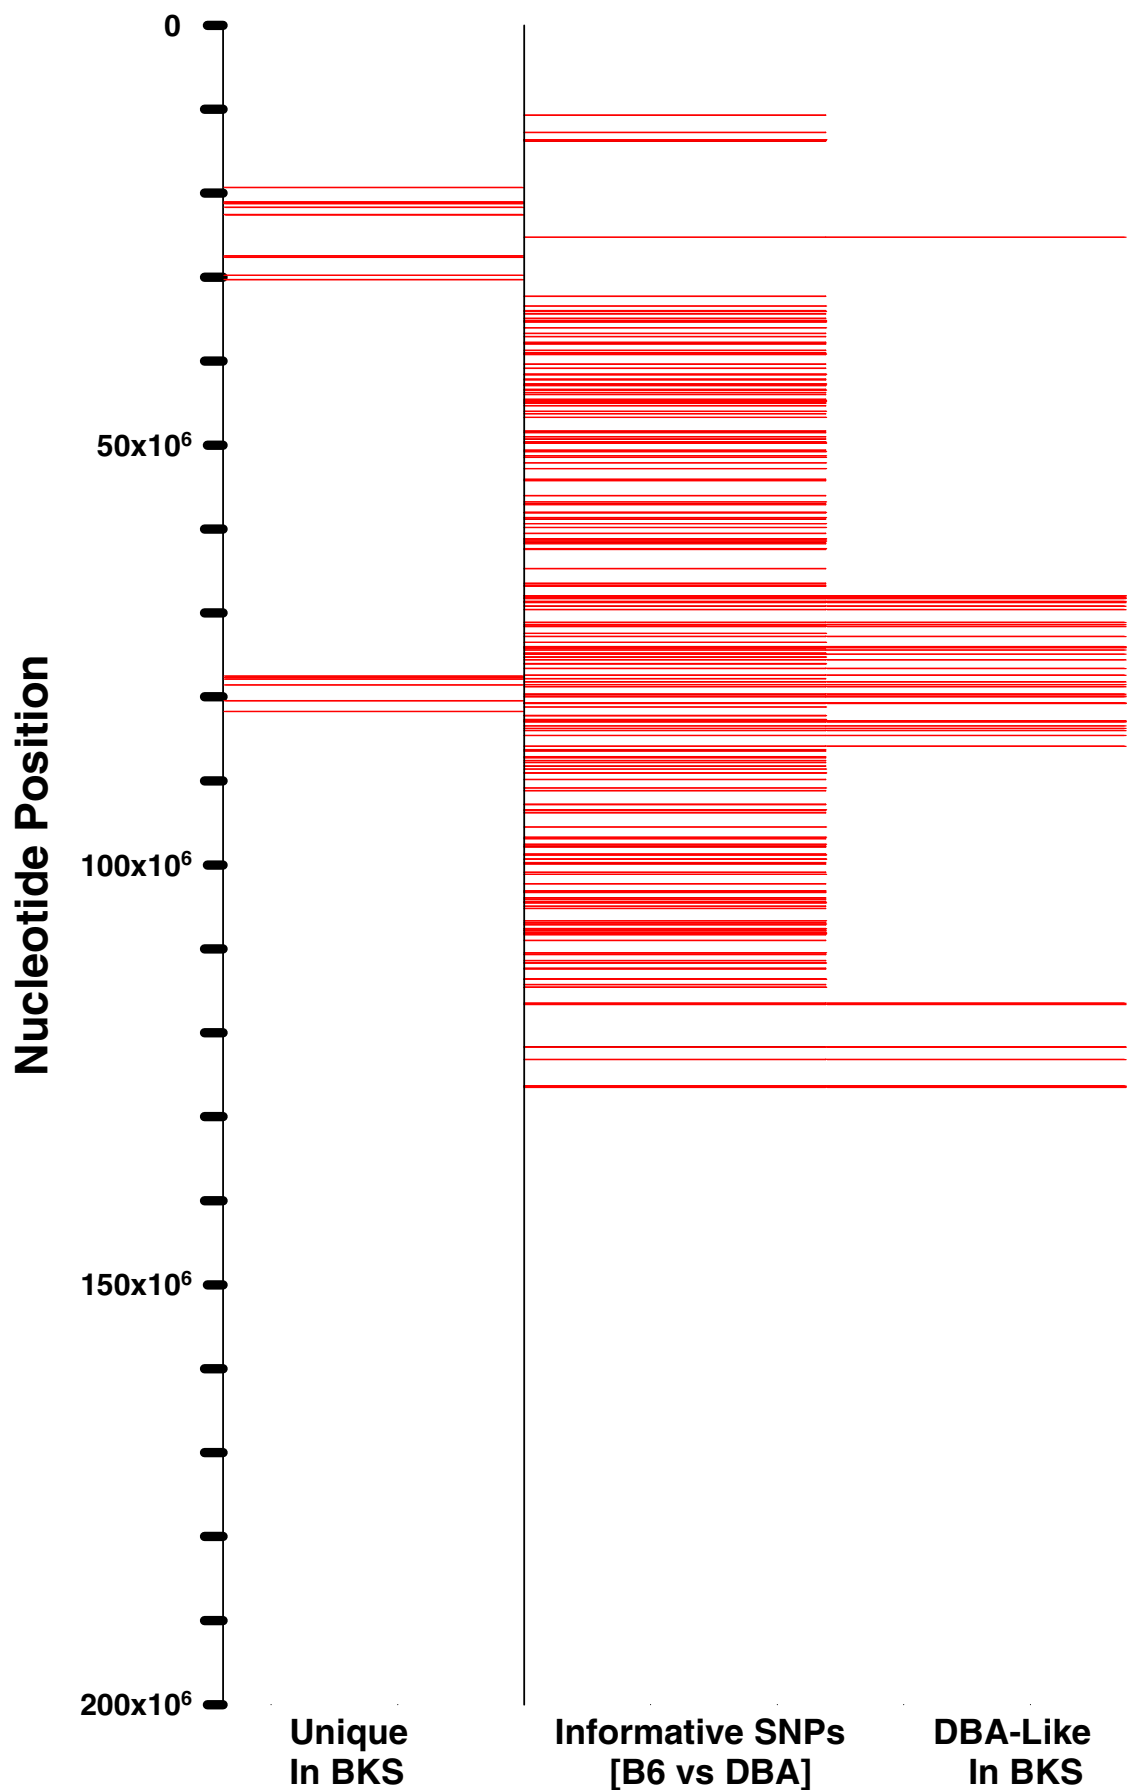

# BKS Chromosome 10

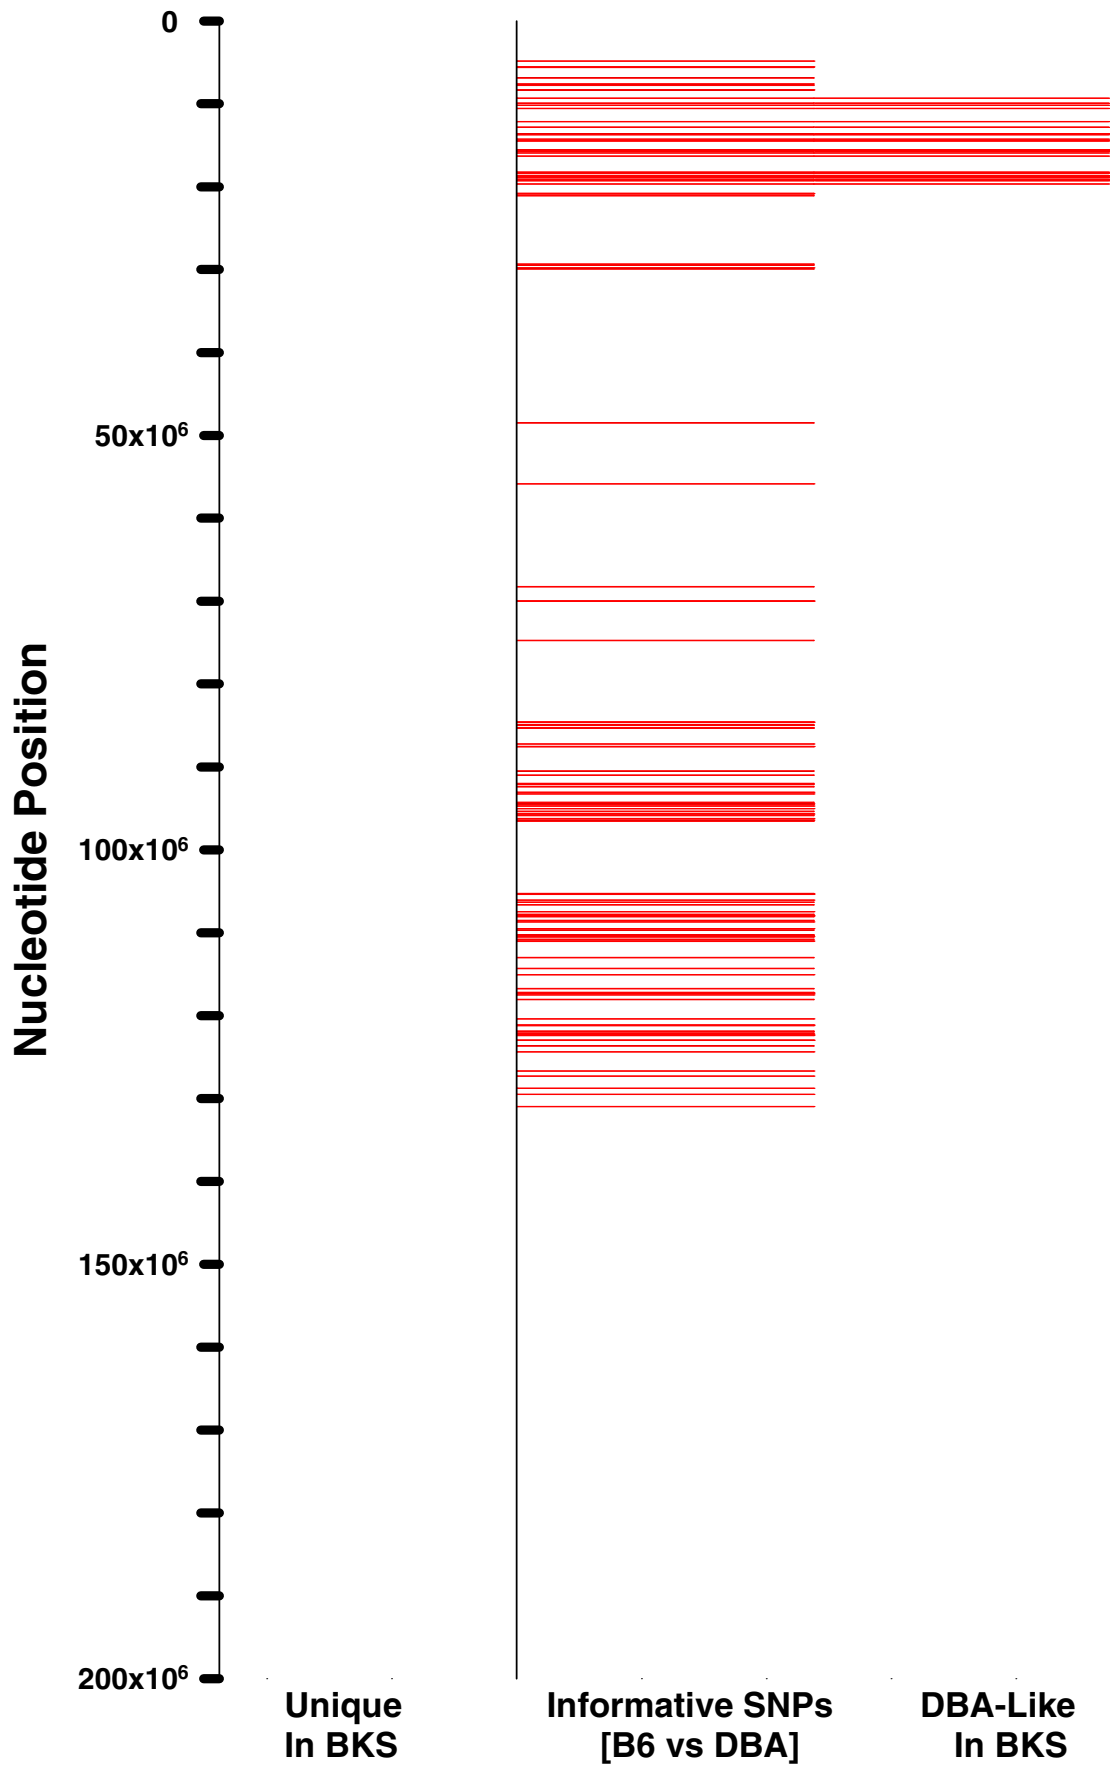

# BKS Chromosome 11

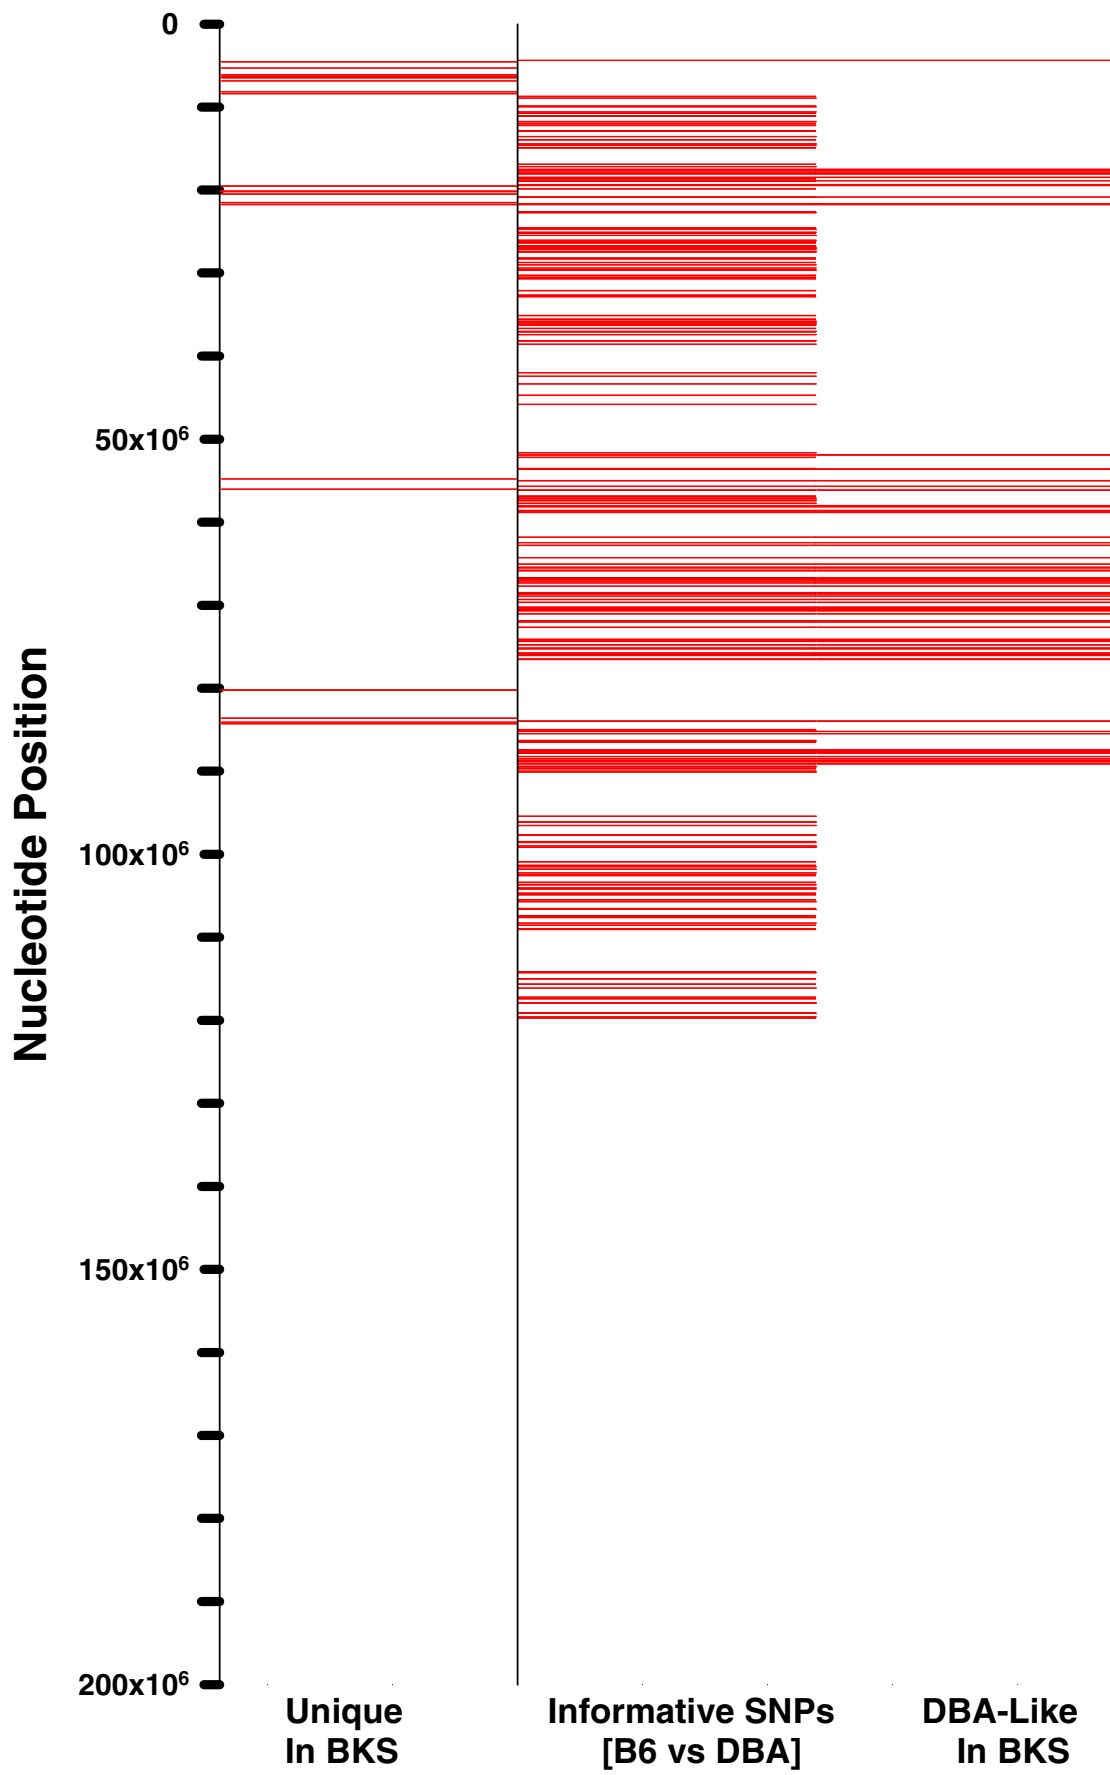

# BKS Chromosome 12

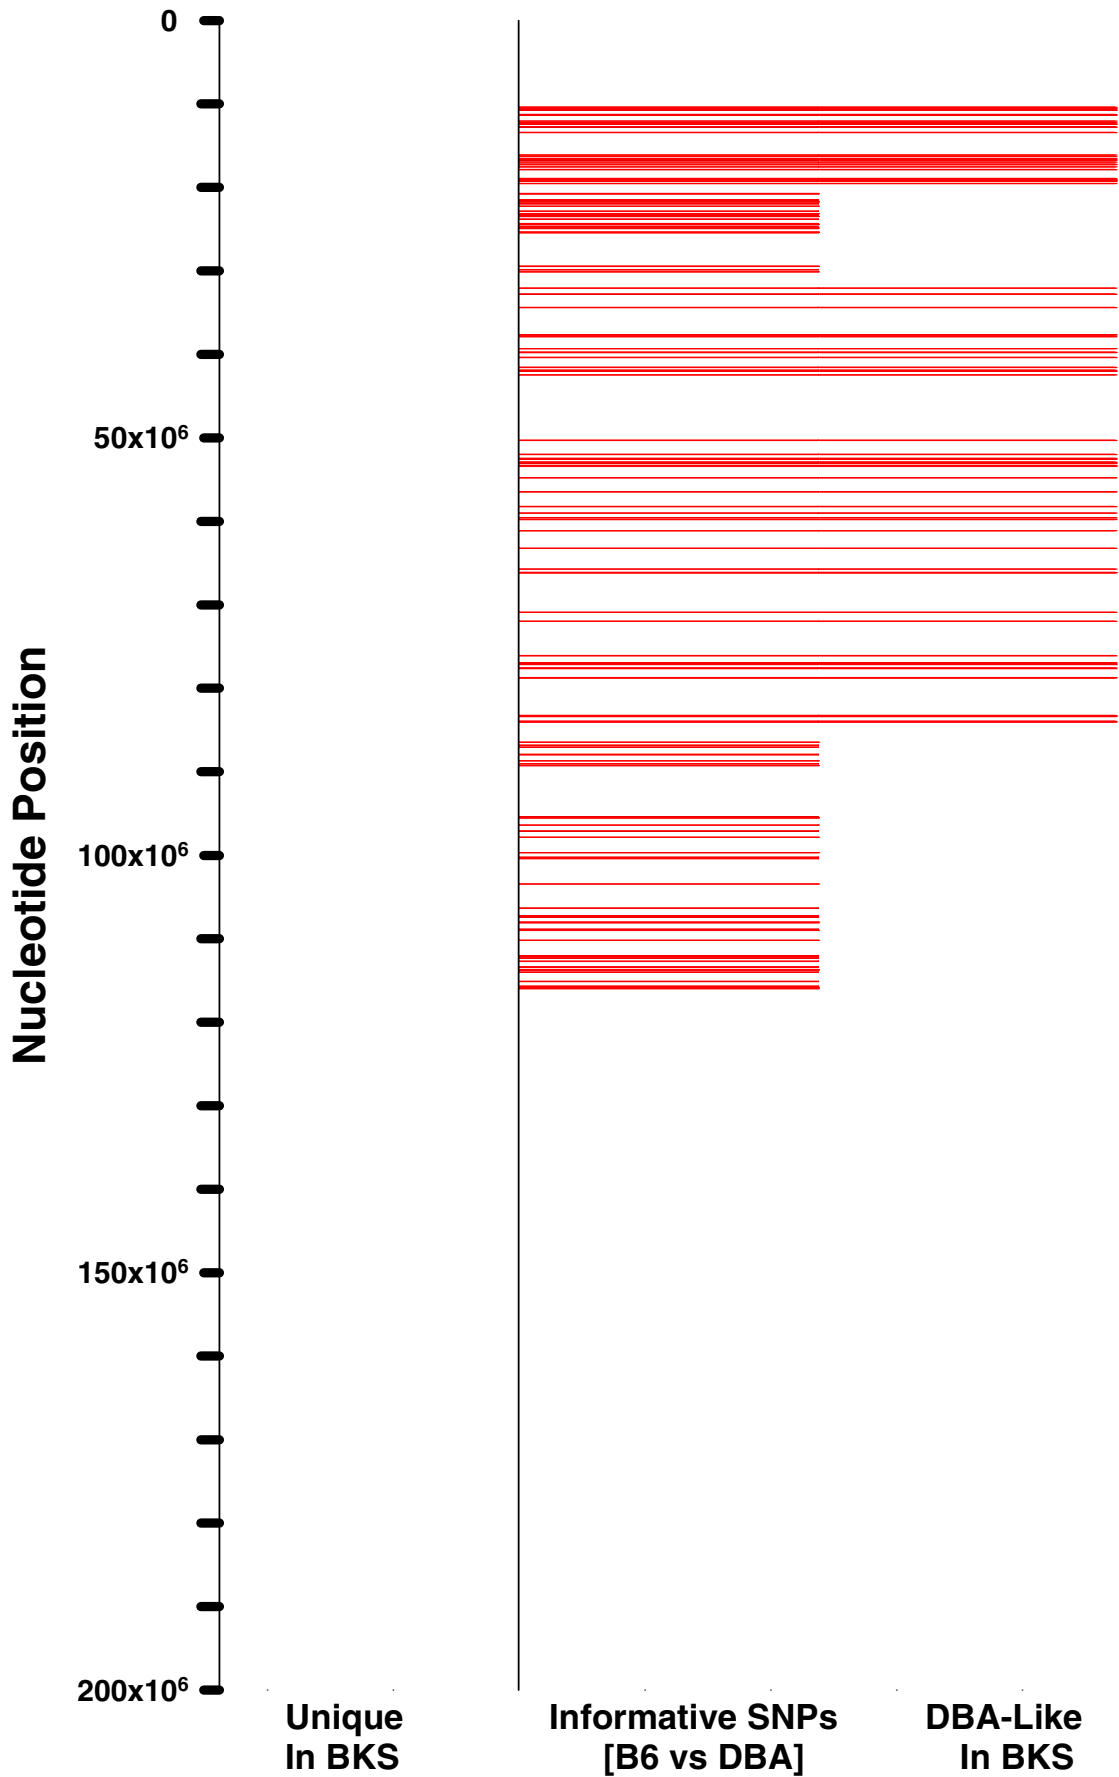

# BKS Chromosome 13

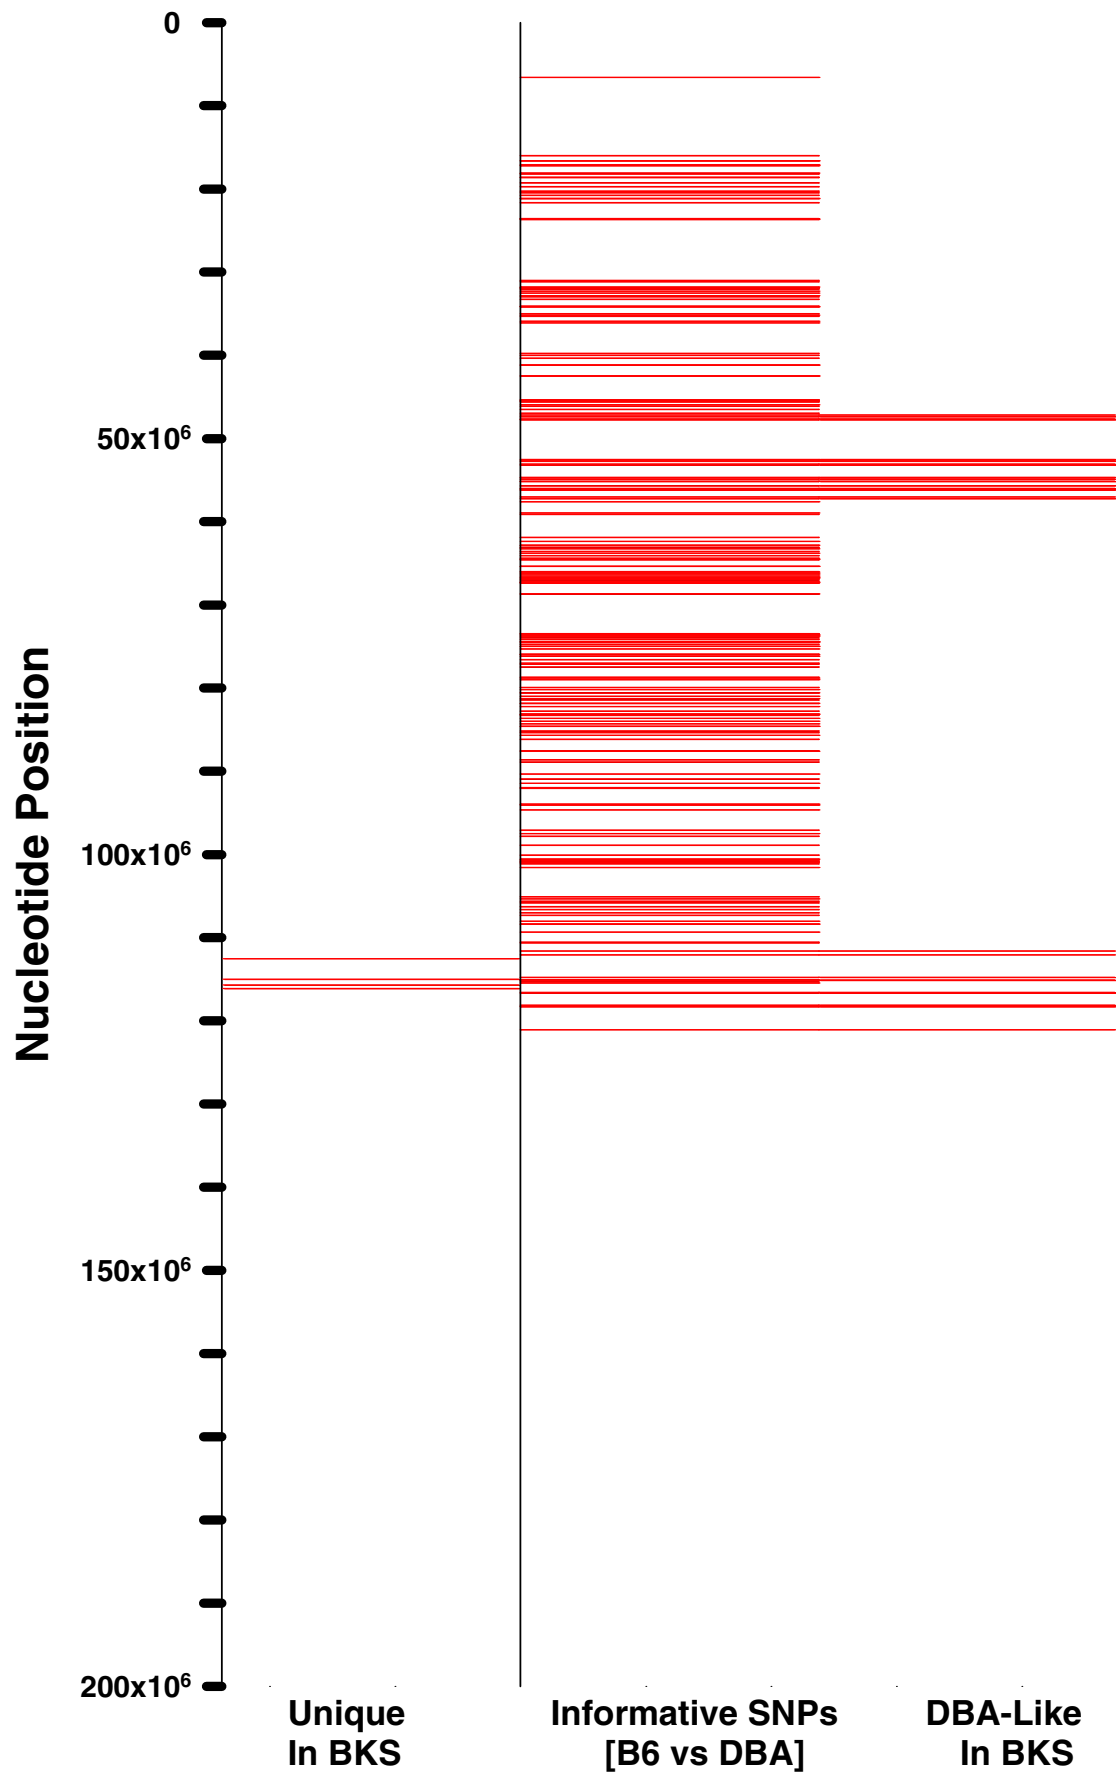

# BKS Chromosome 14

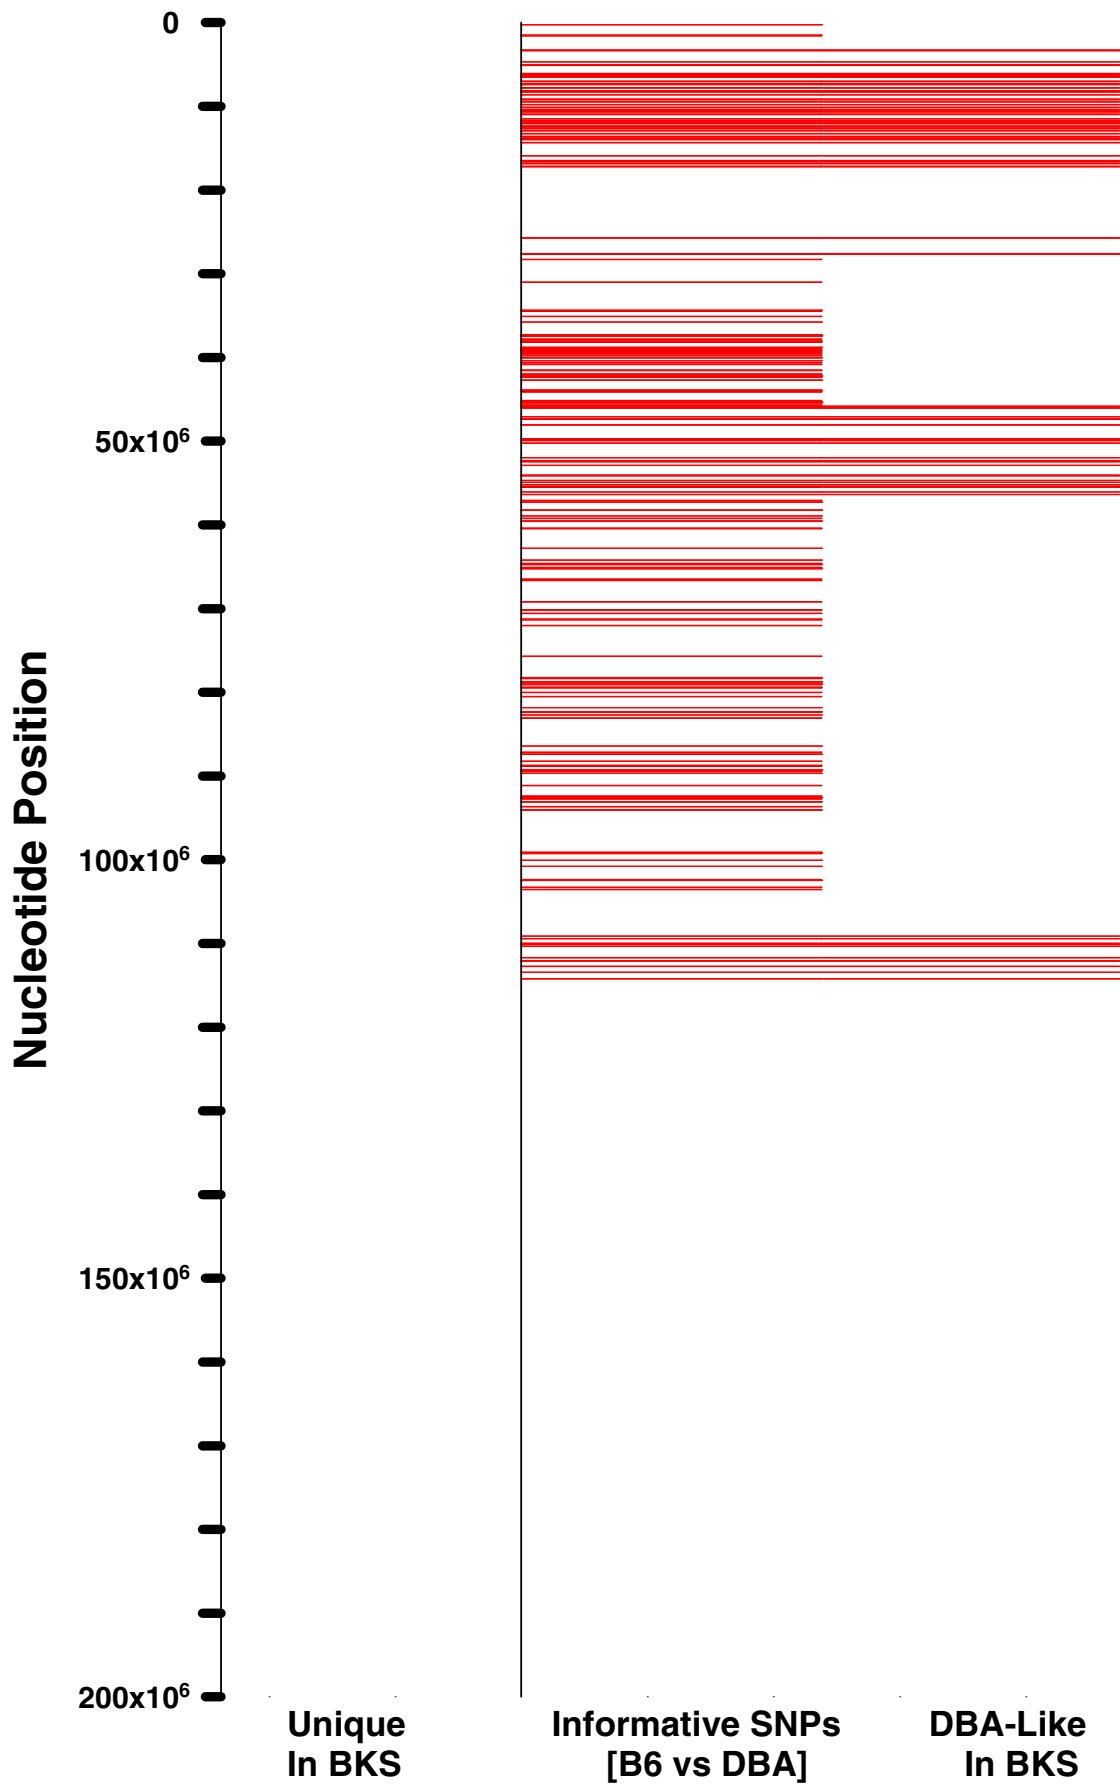

# BKS Chromosome 15

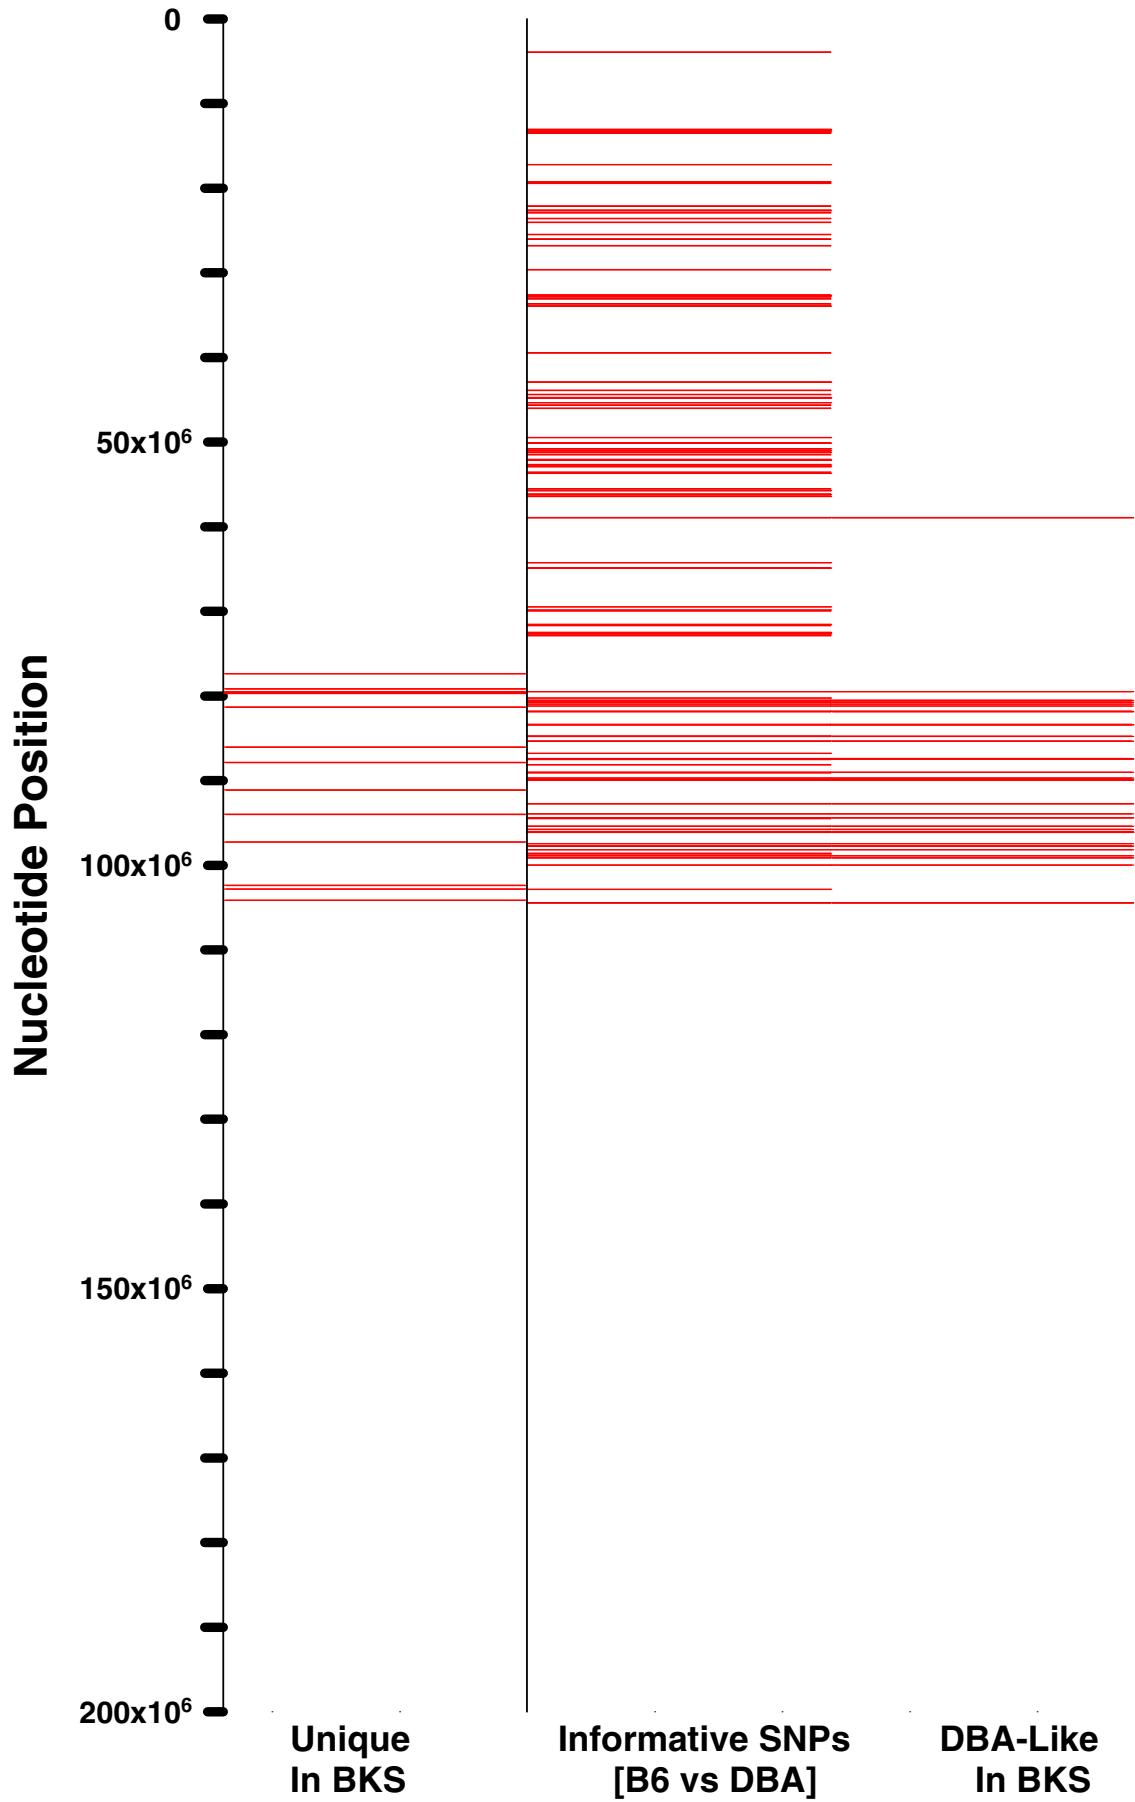

# BKS Chromosome 16

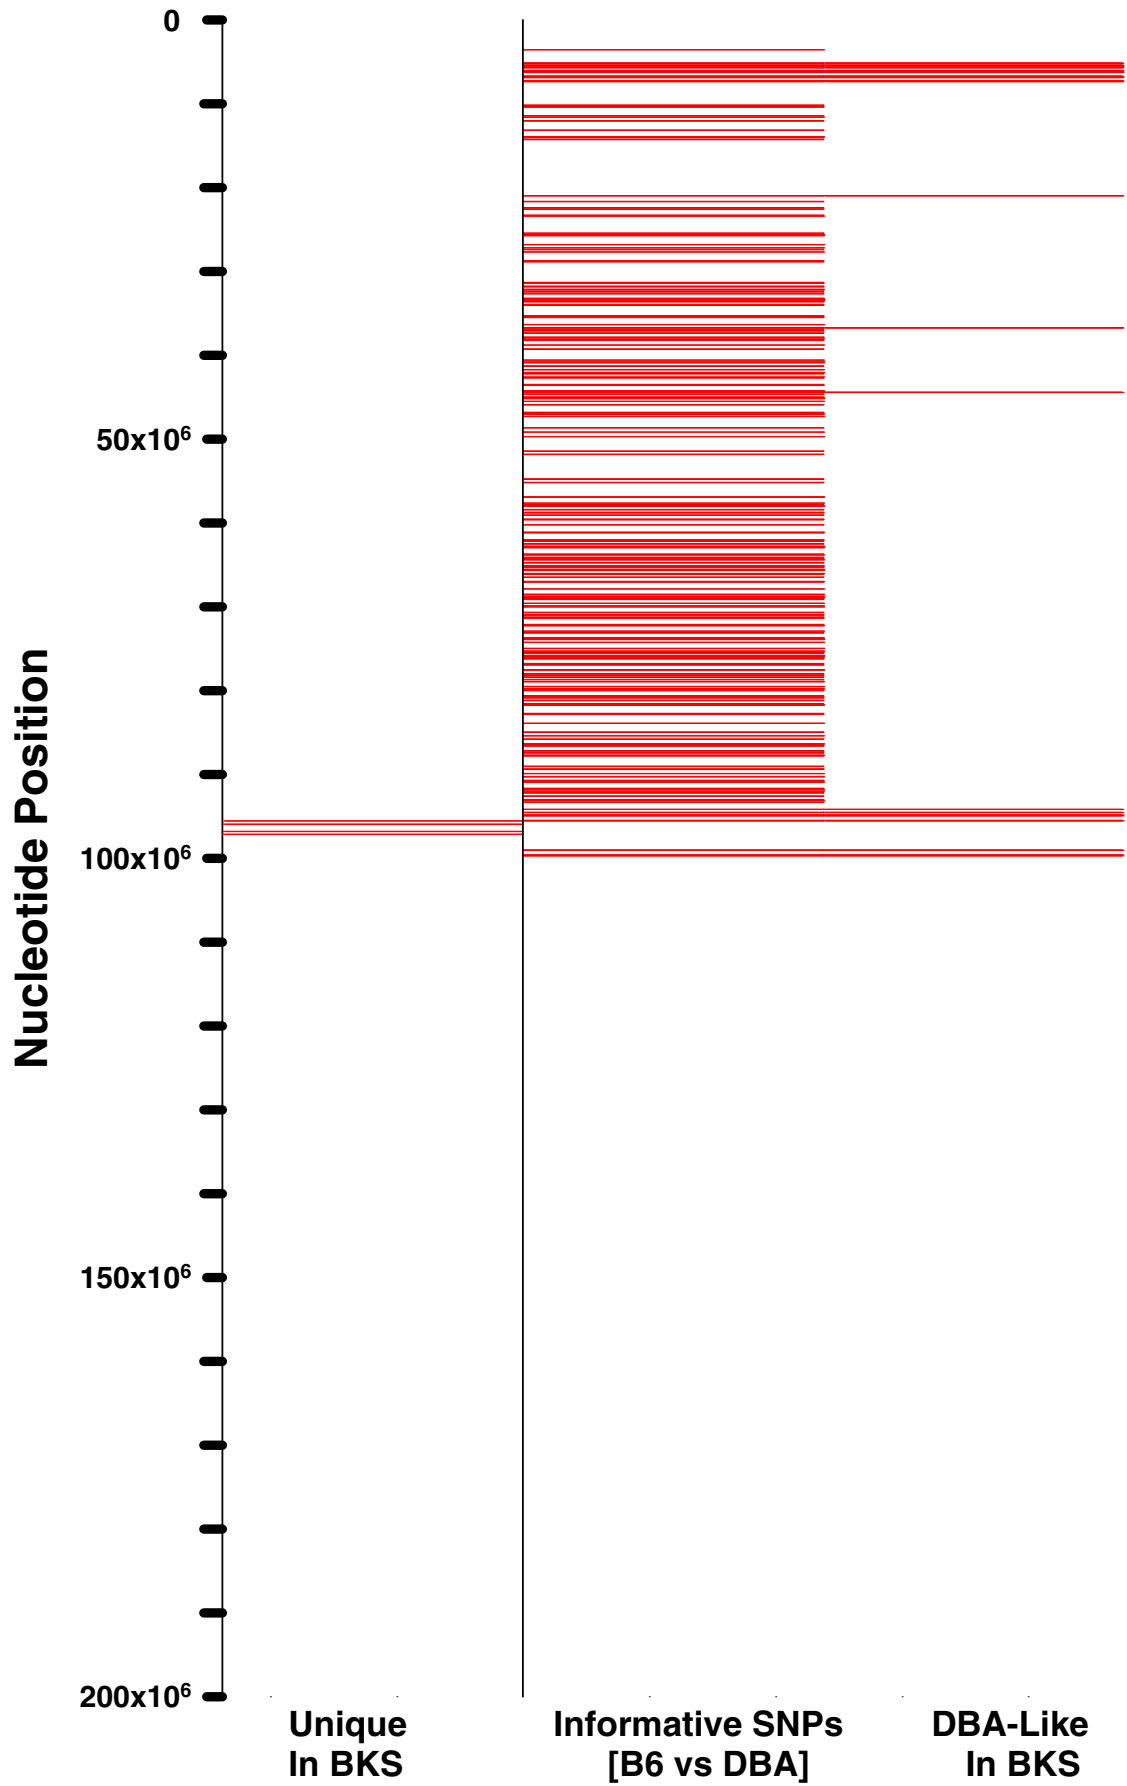

# BKS Chromosome 17

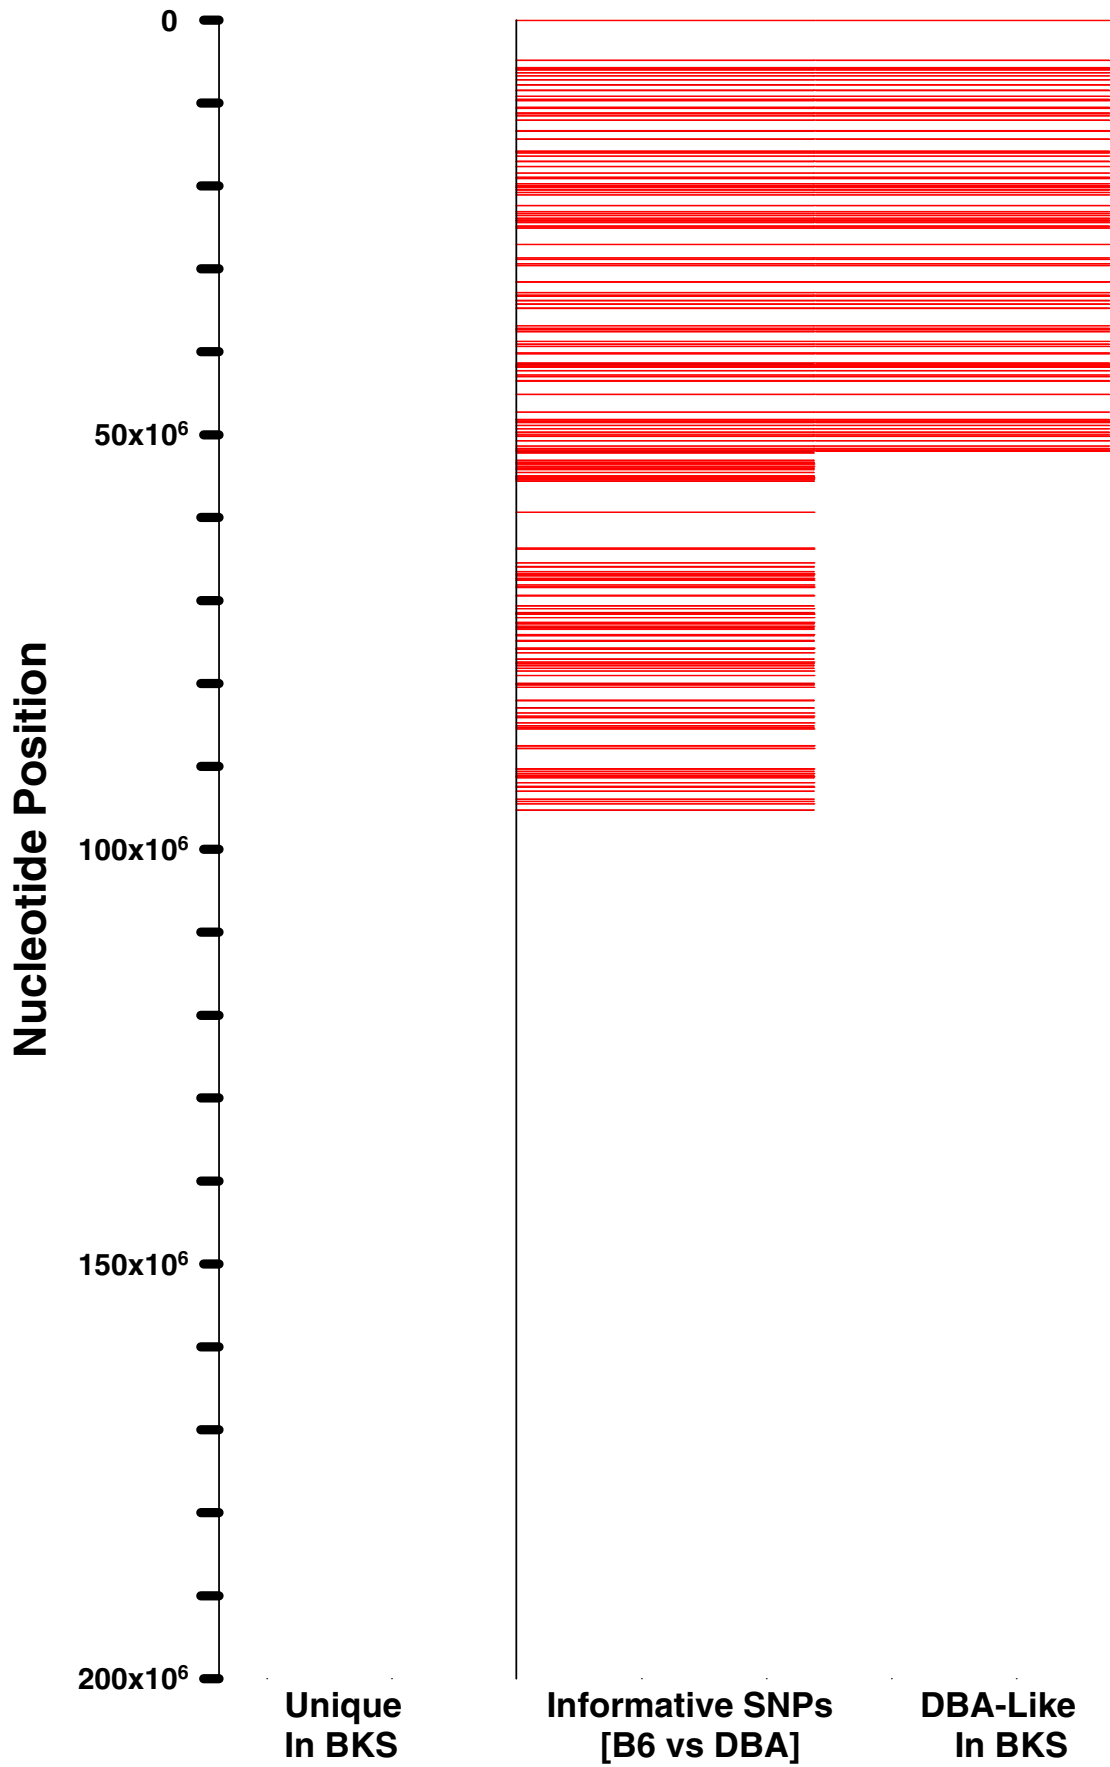

# BKS Chromosome 18

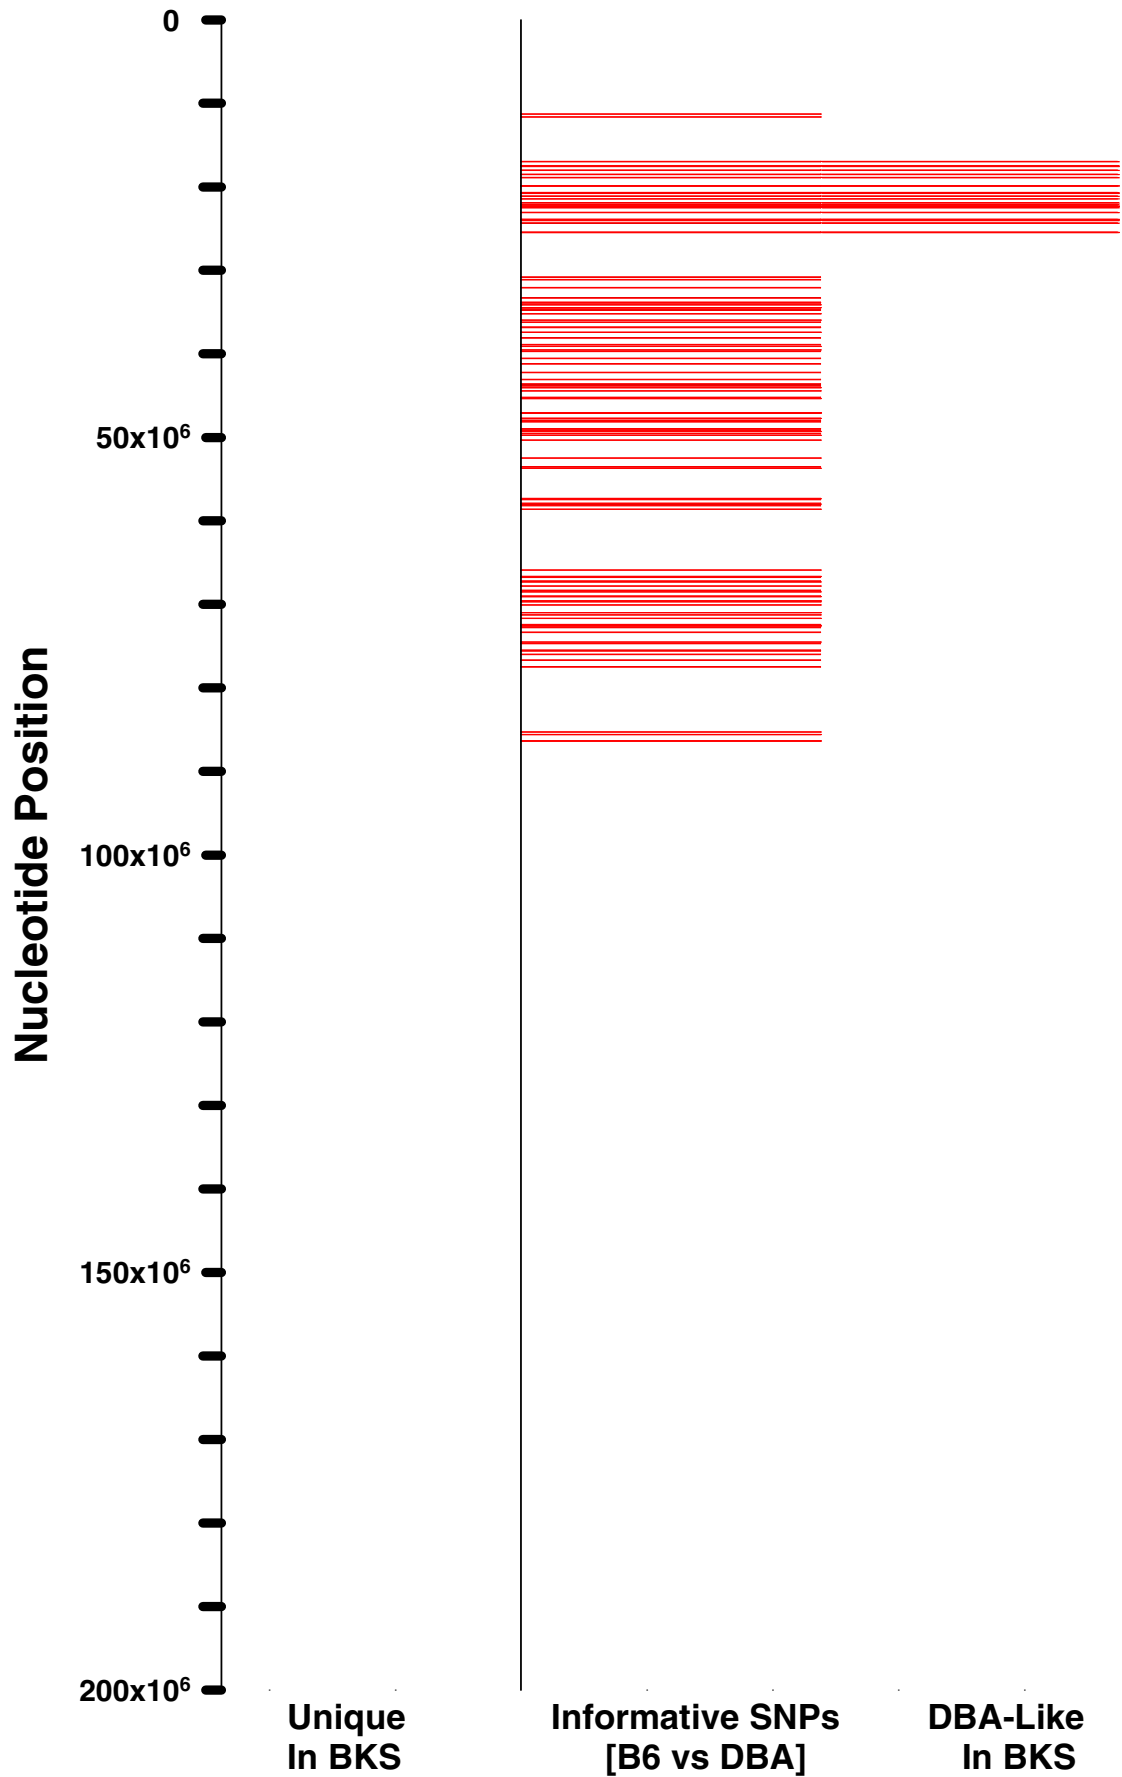

# BKS Chromosome 19

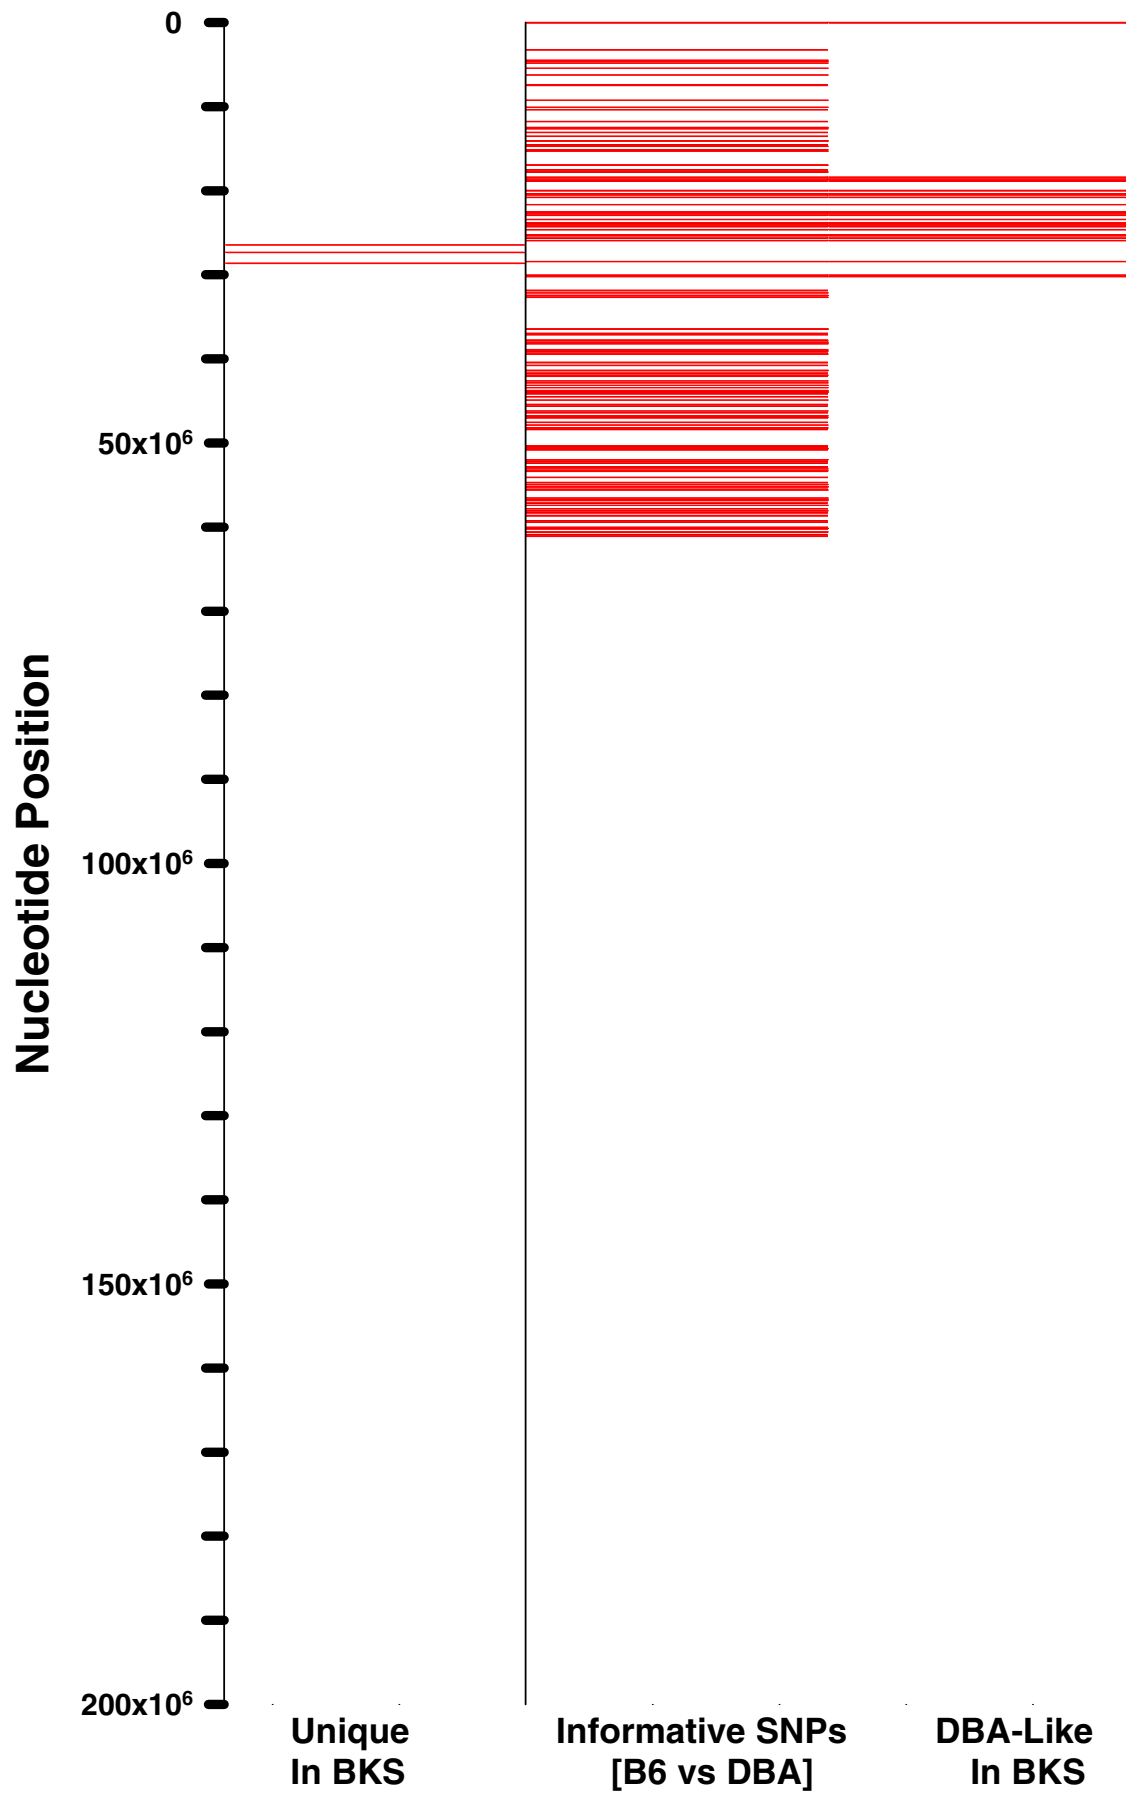

# BKS X-Chromosome

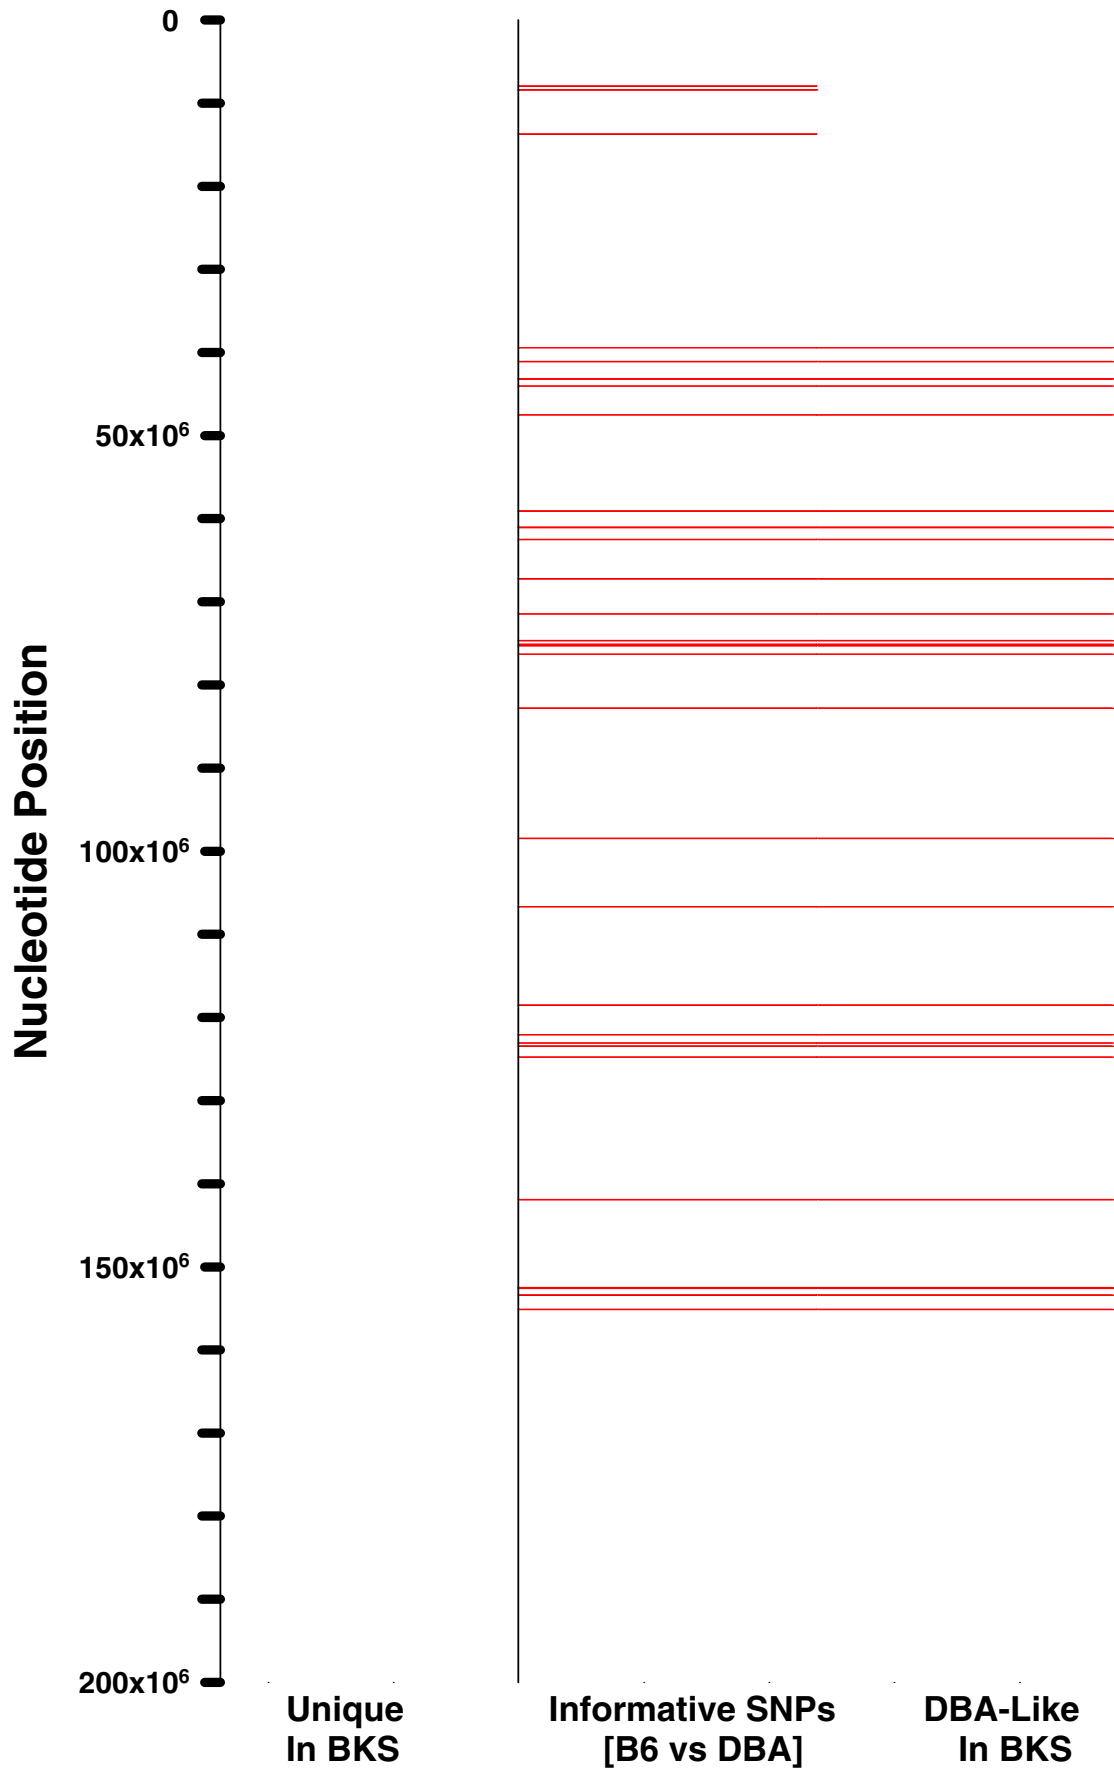

Supplement: pg1191DavisSupplementaryFigure1.pdf [file pg1191DavisSupplementaryFigure1.pdf]
