# Supplementary material
Source: HighWire-hosted journal article supplement (https://diabetes.diabetesjournals.org/content/suppl/2007/03/09/54.4.1191)

# Chromosome 1

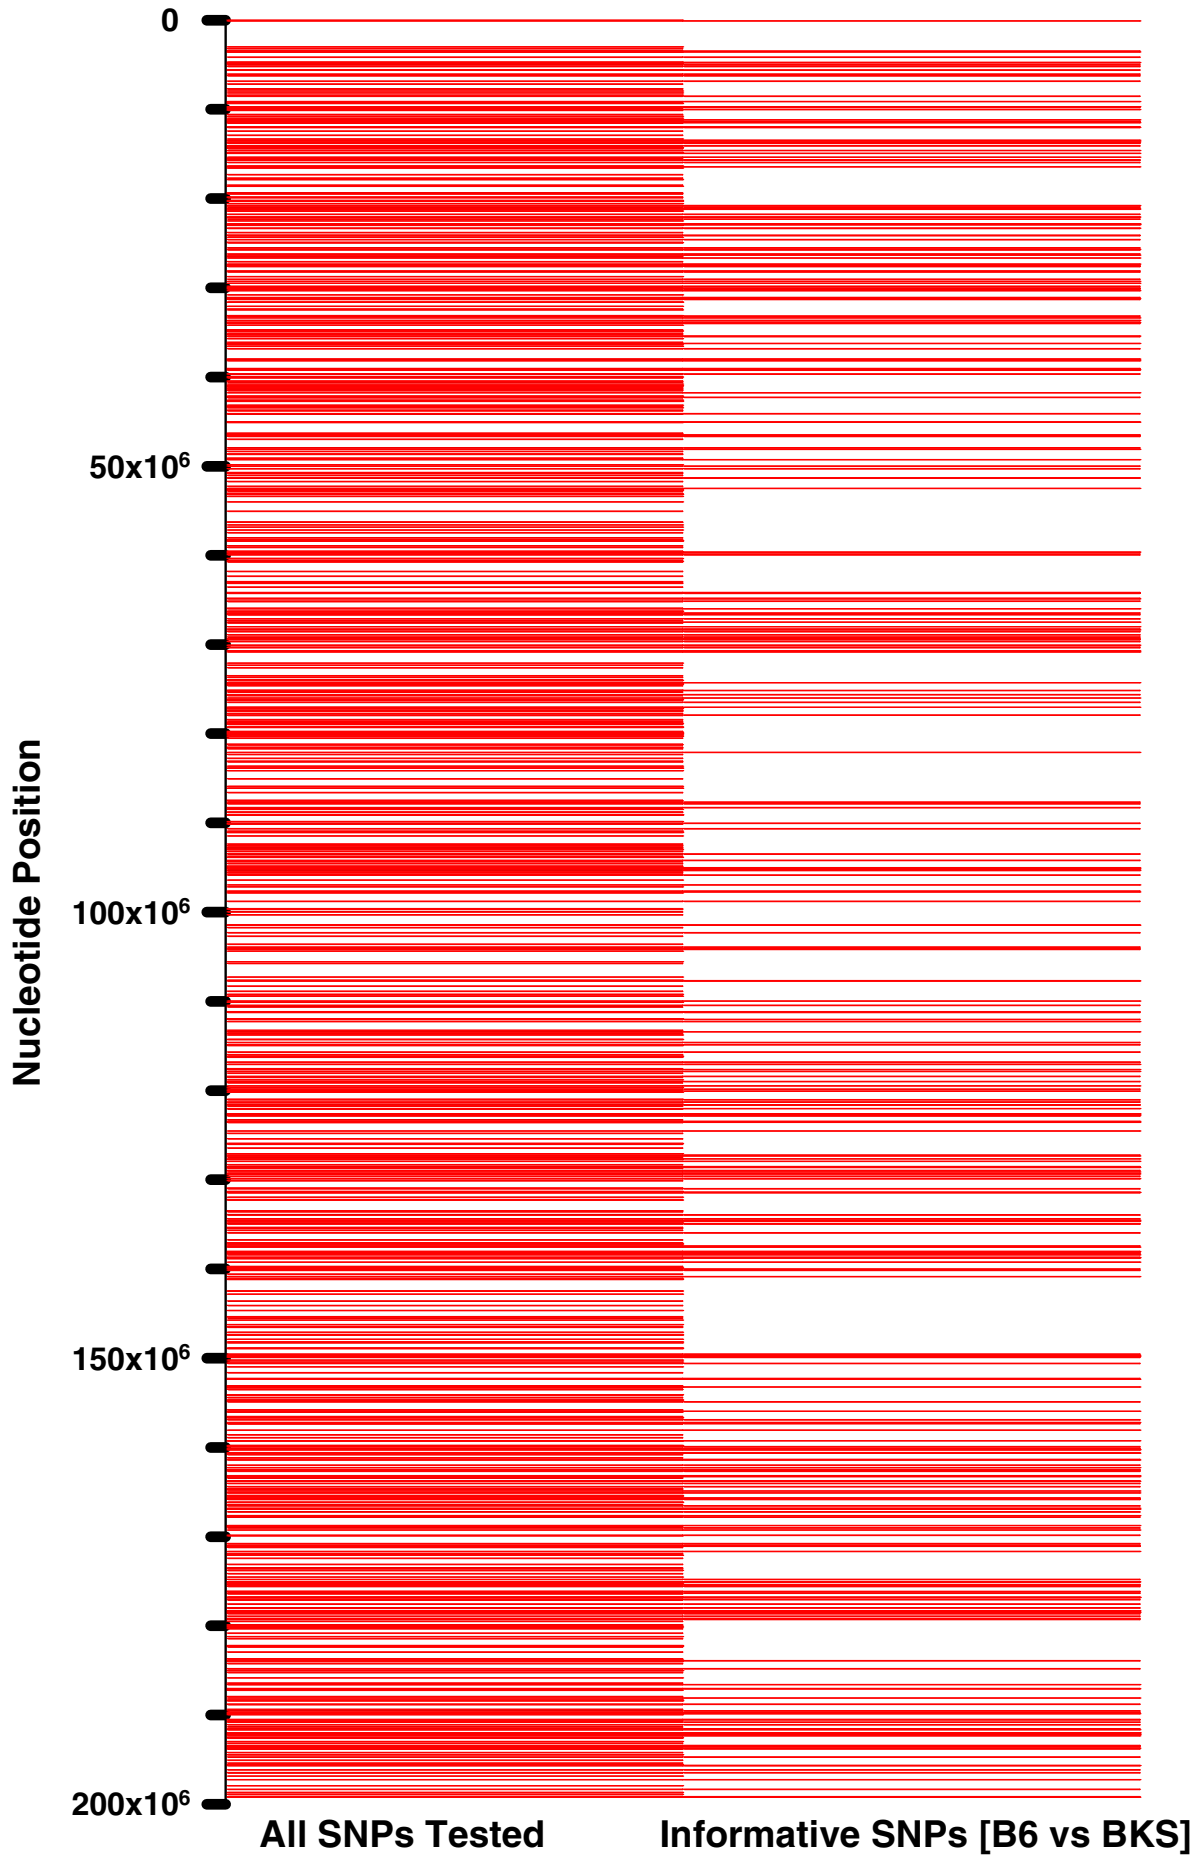

# Chromosome 2

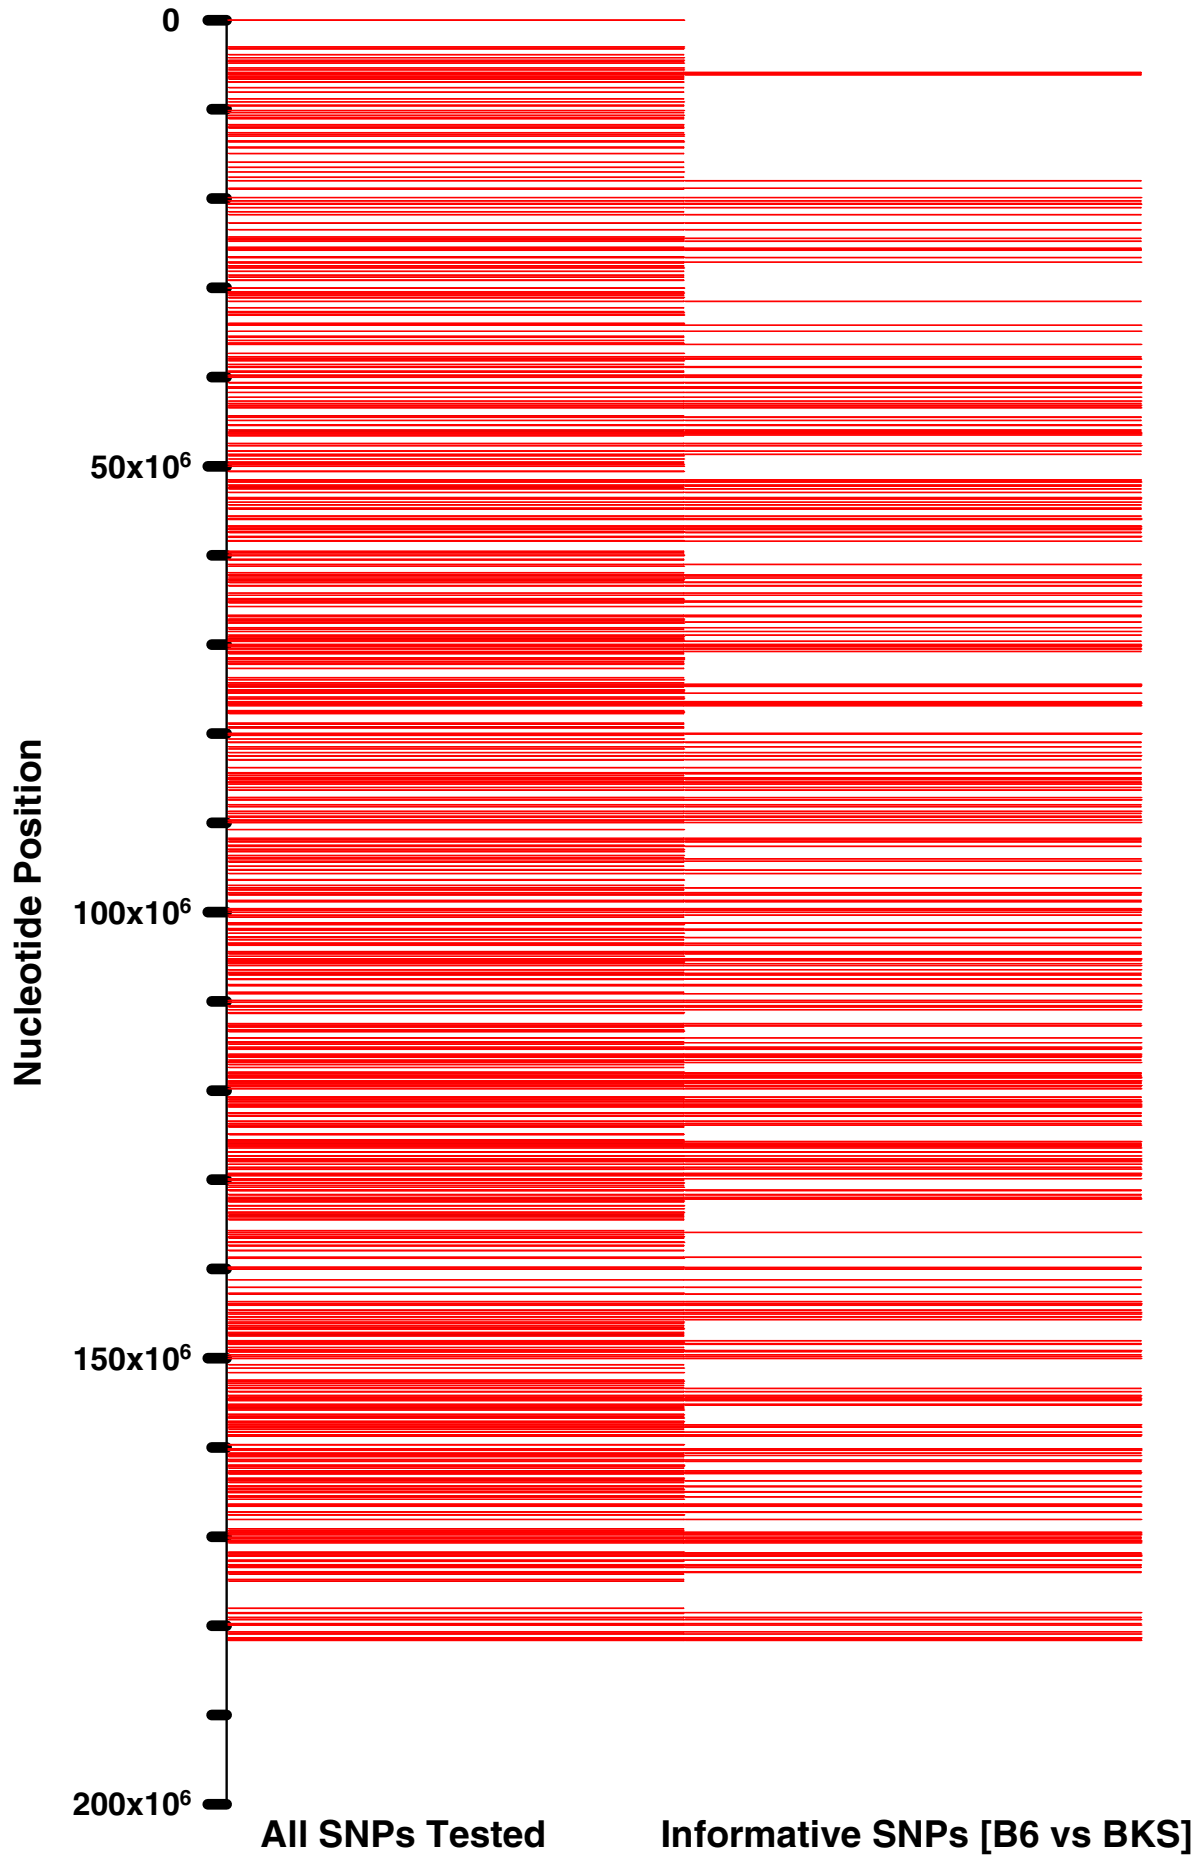

# Chromosome 3

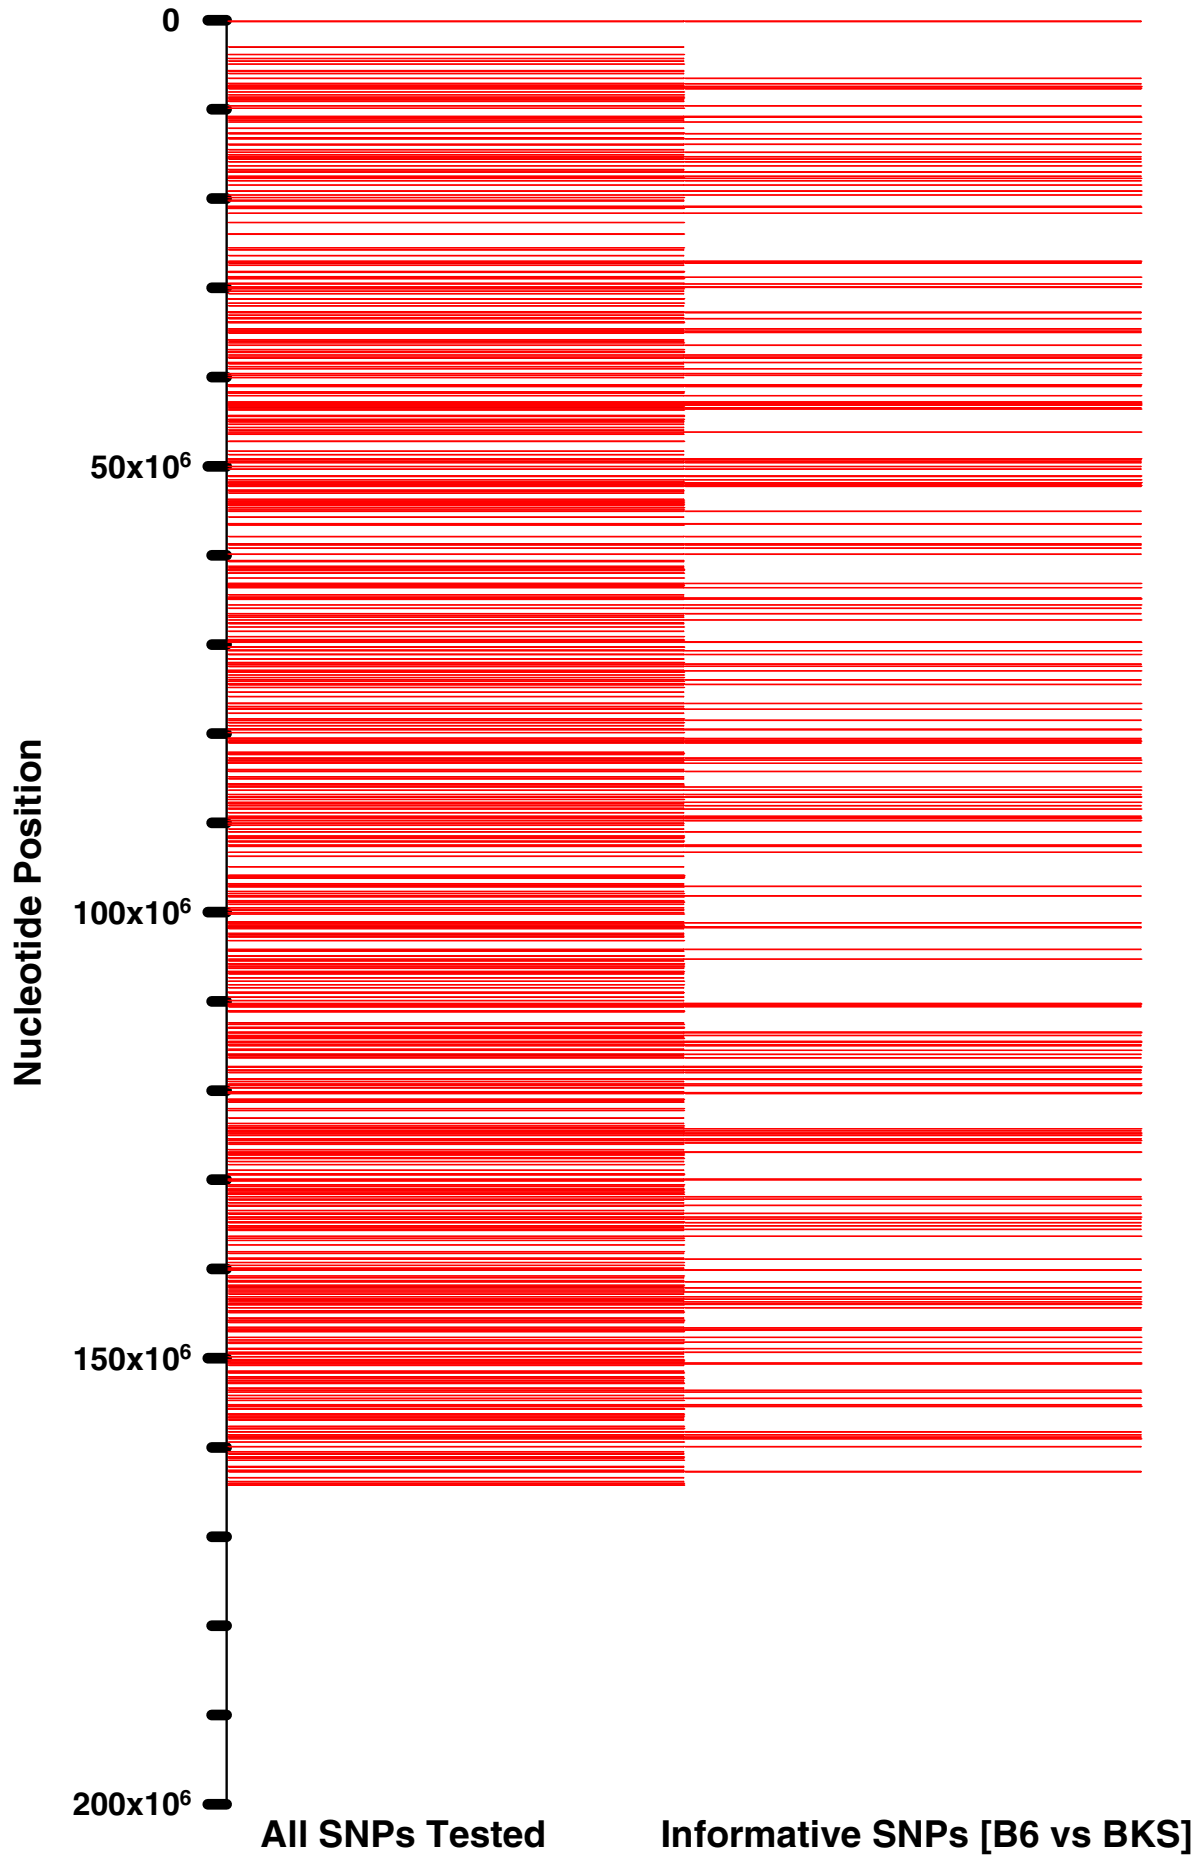

# Chromosome 4

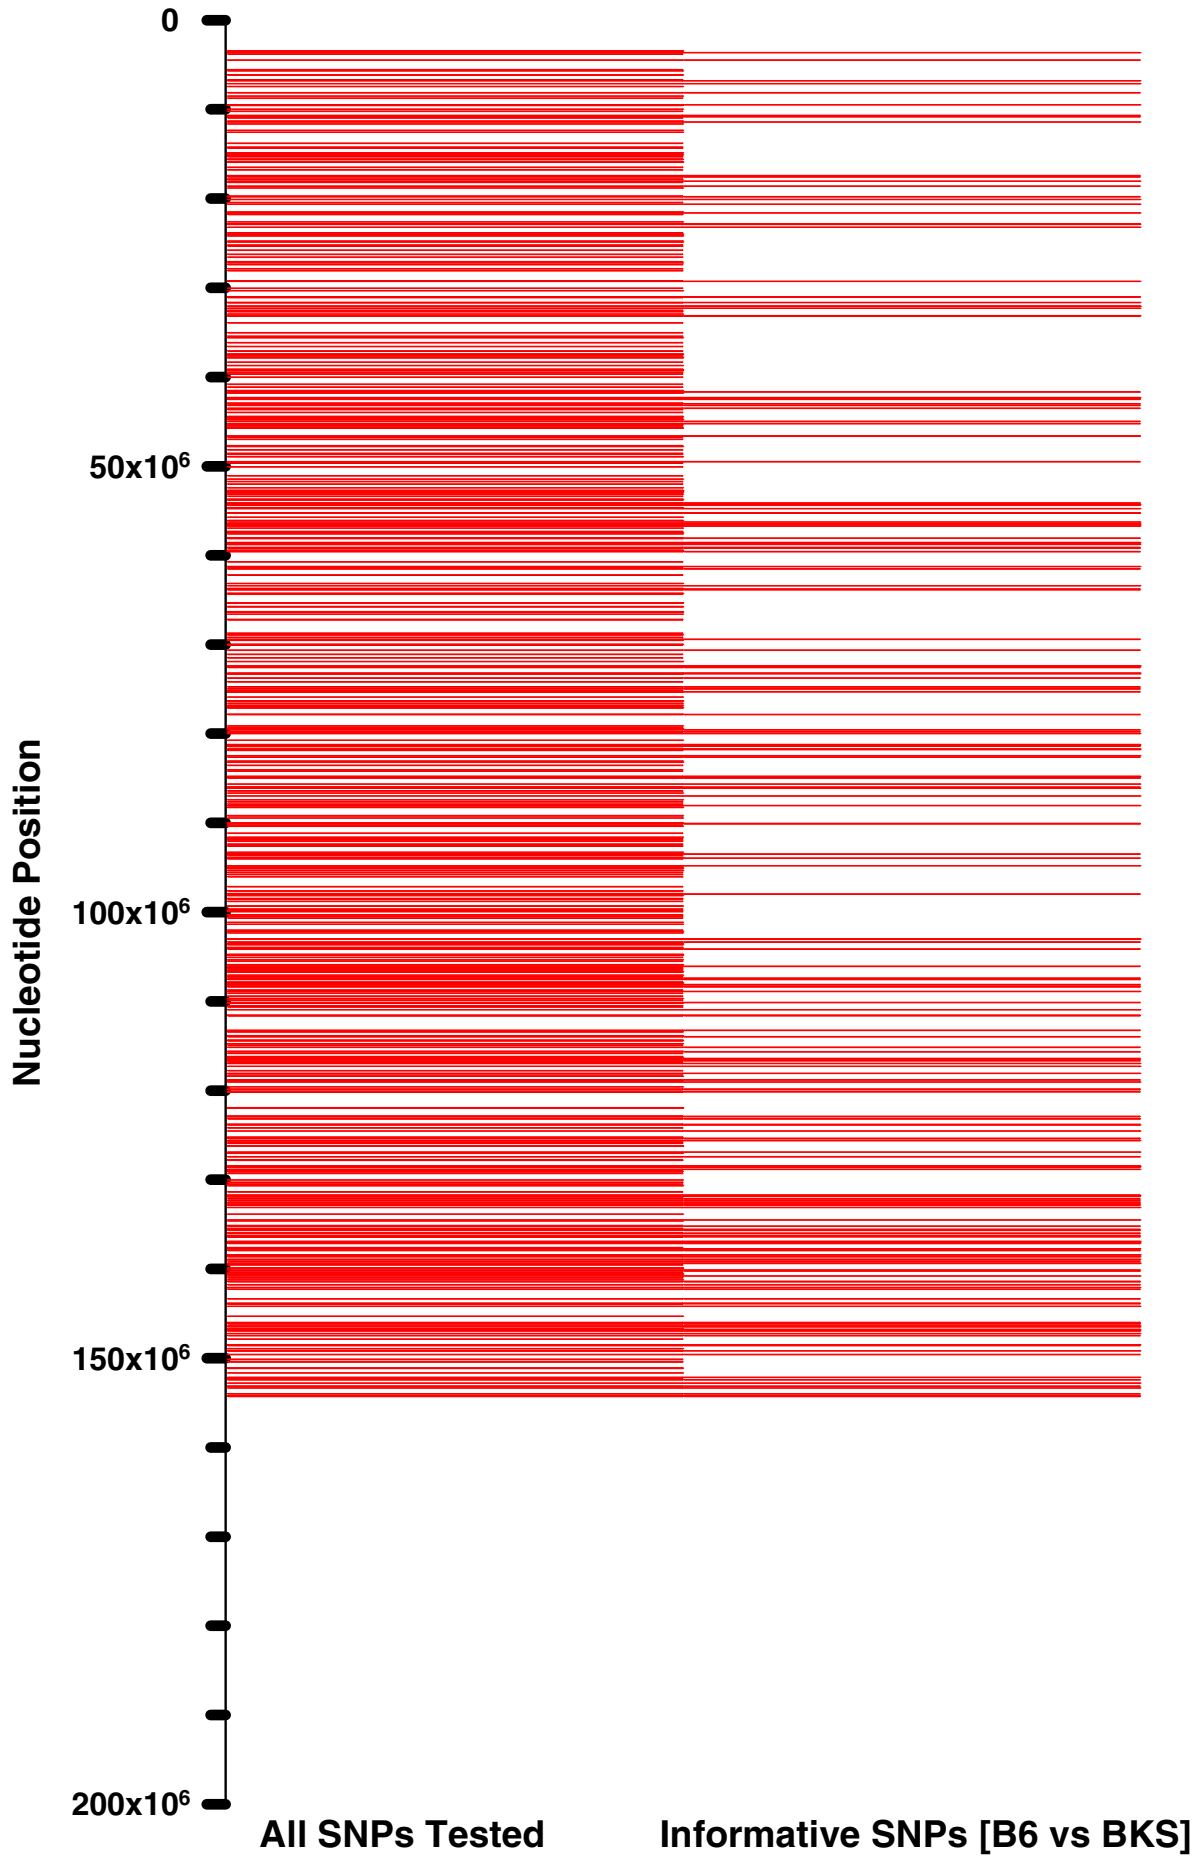

# Chromosome 5

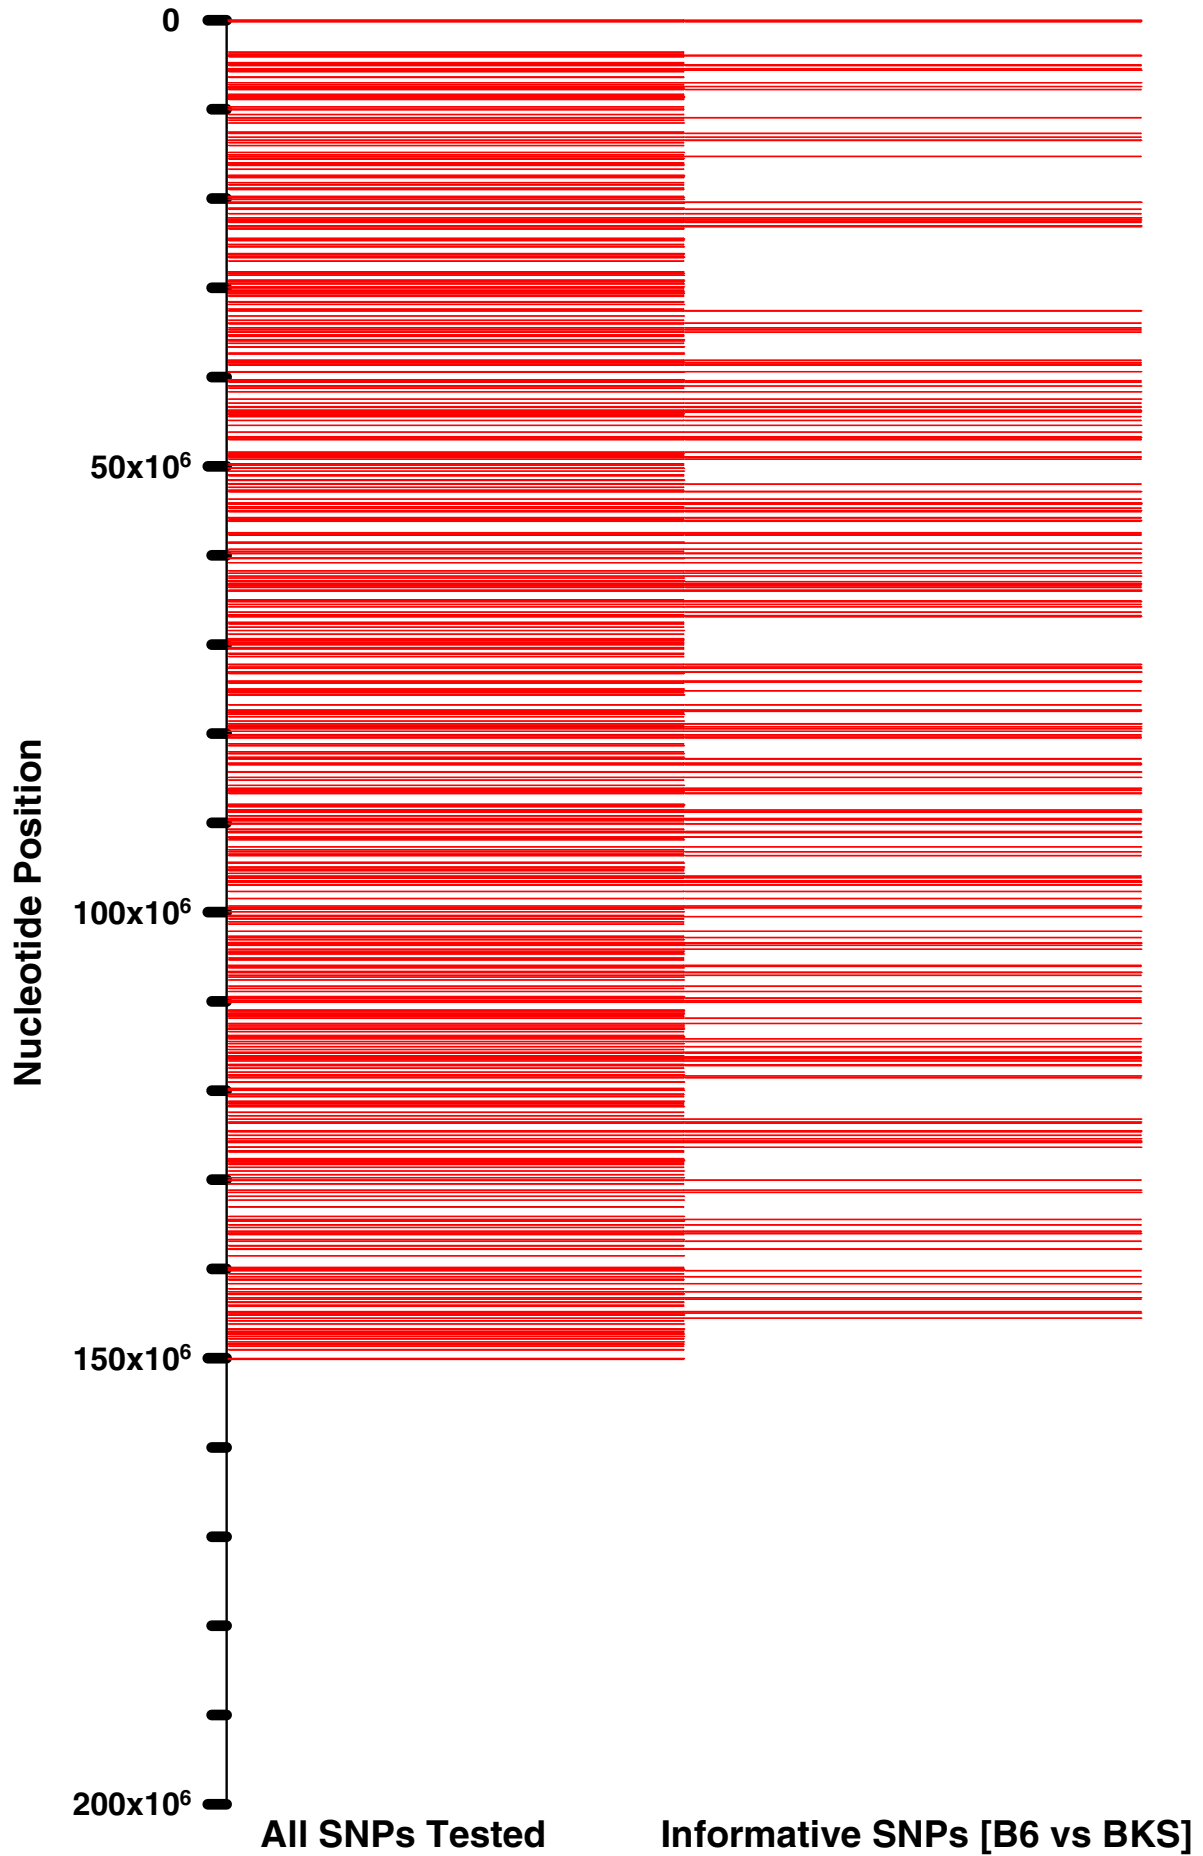

# Chromosome 6

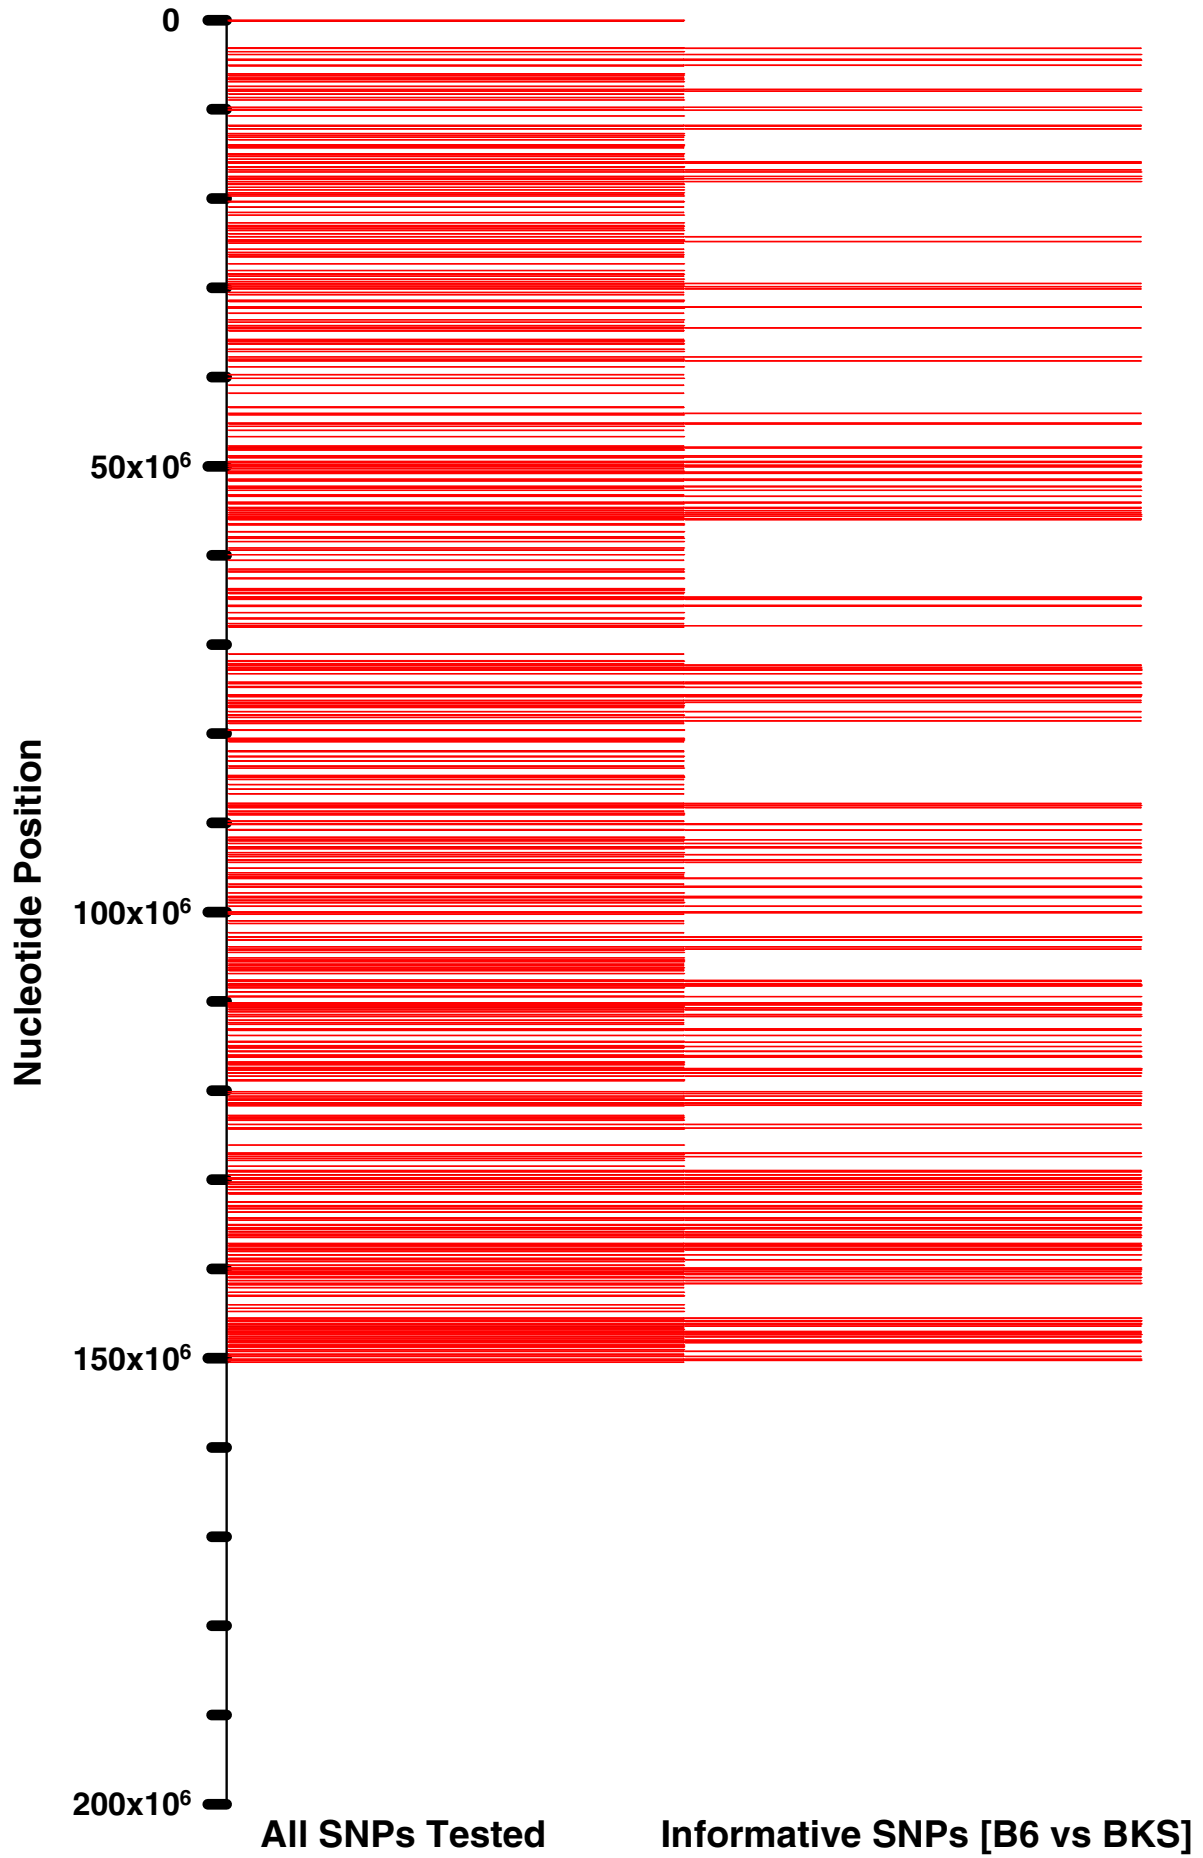

# Chromosome 7

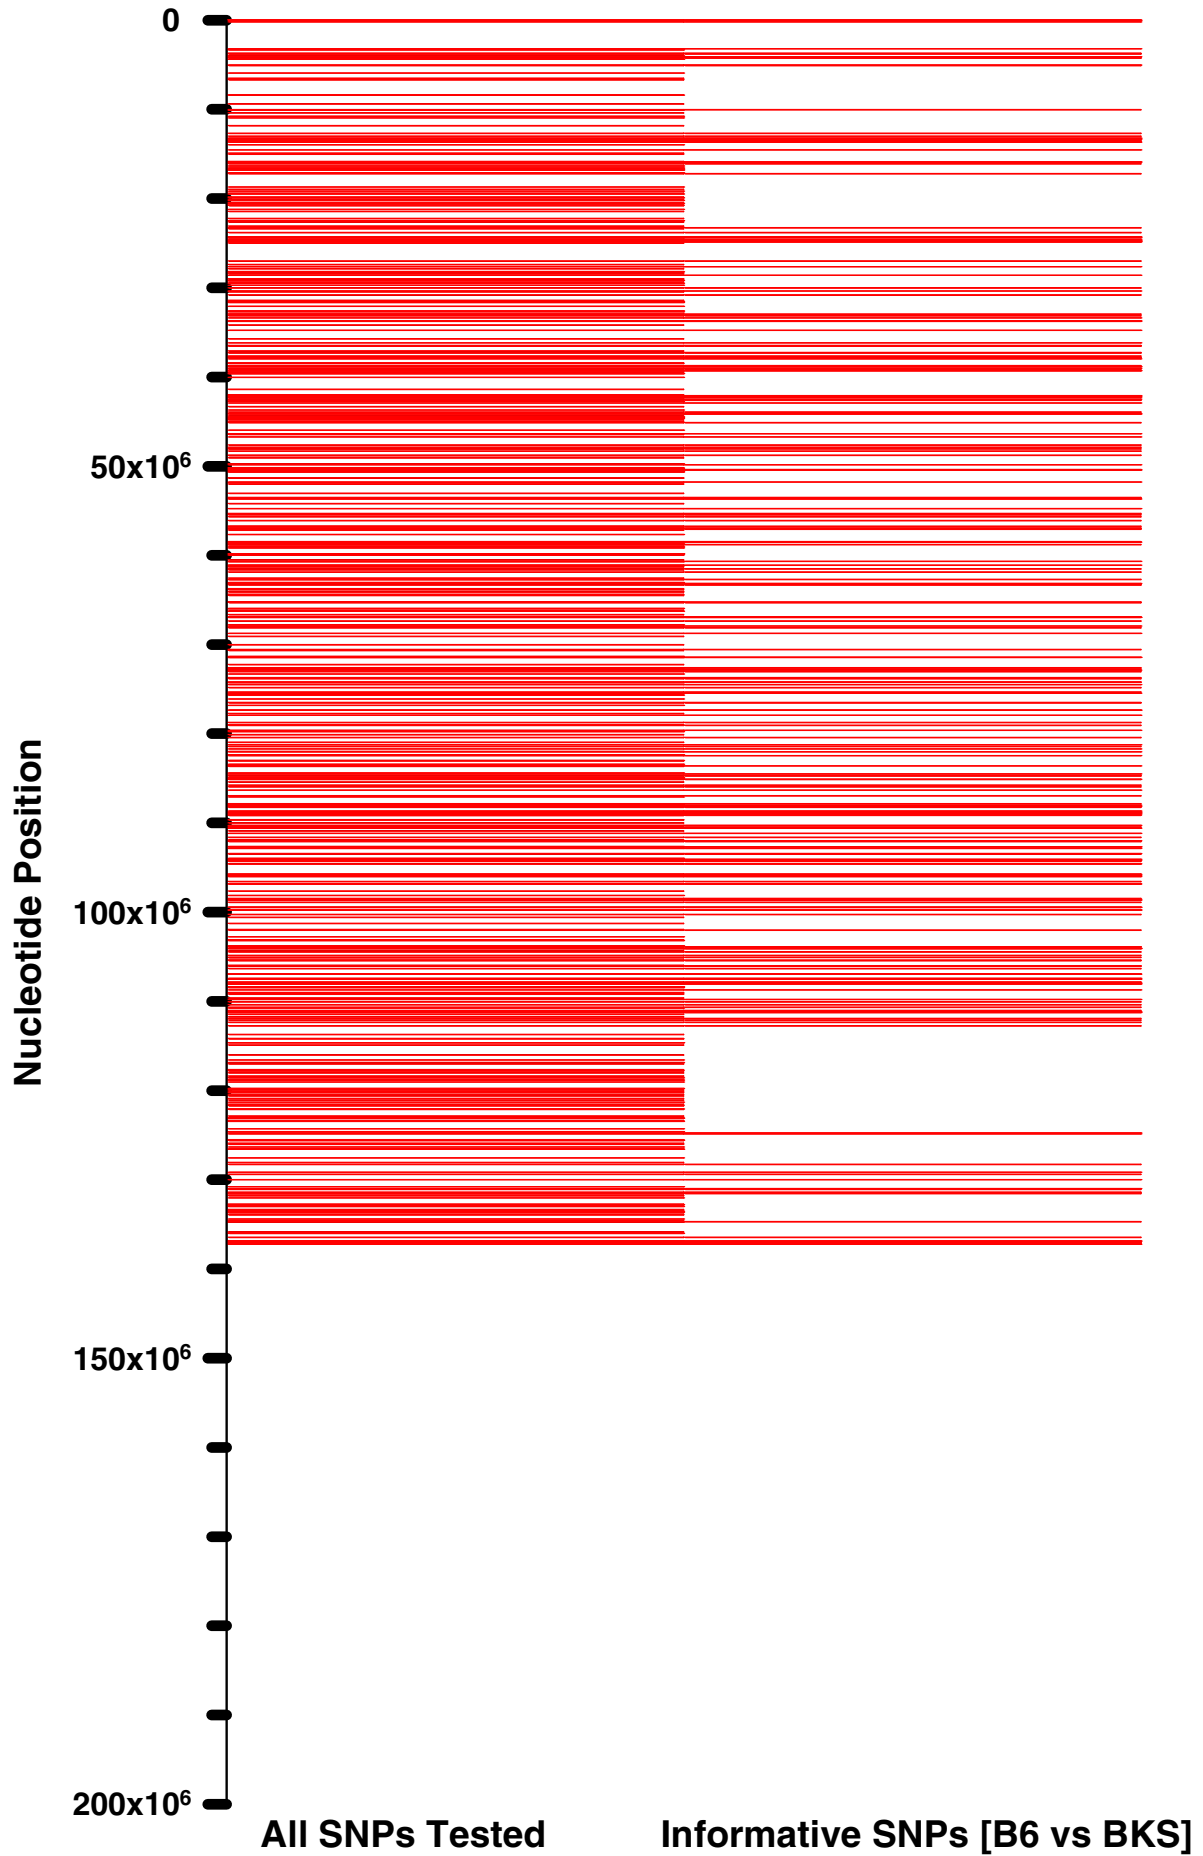

# Chromosome 8

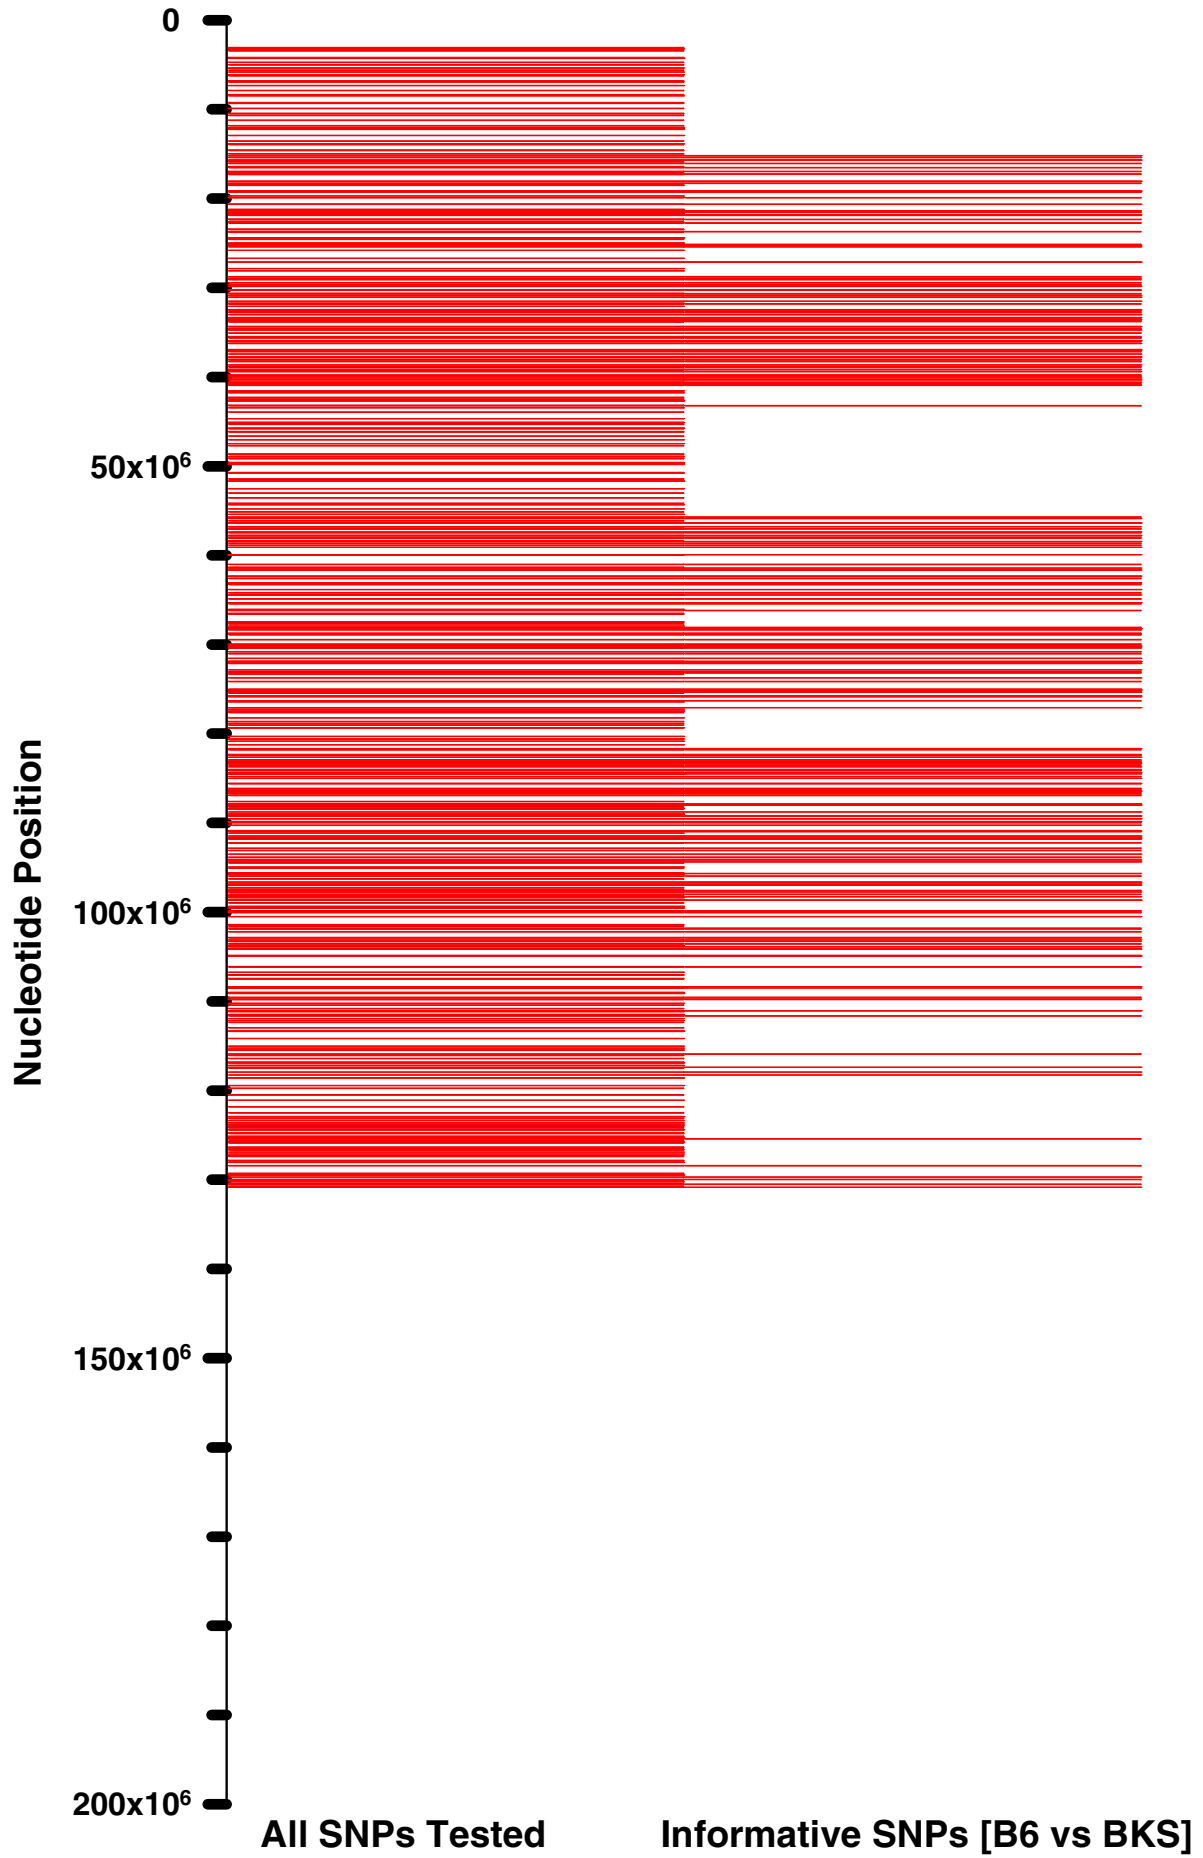

# Chromosome 9

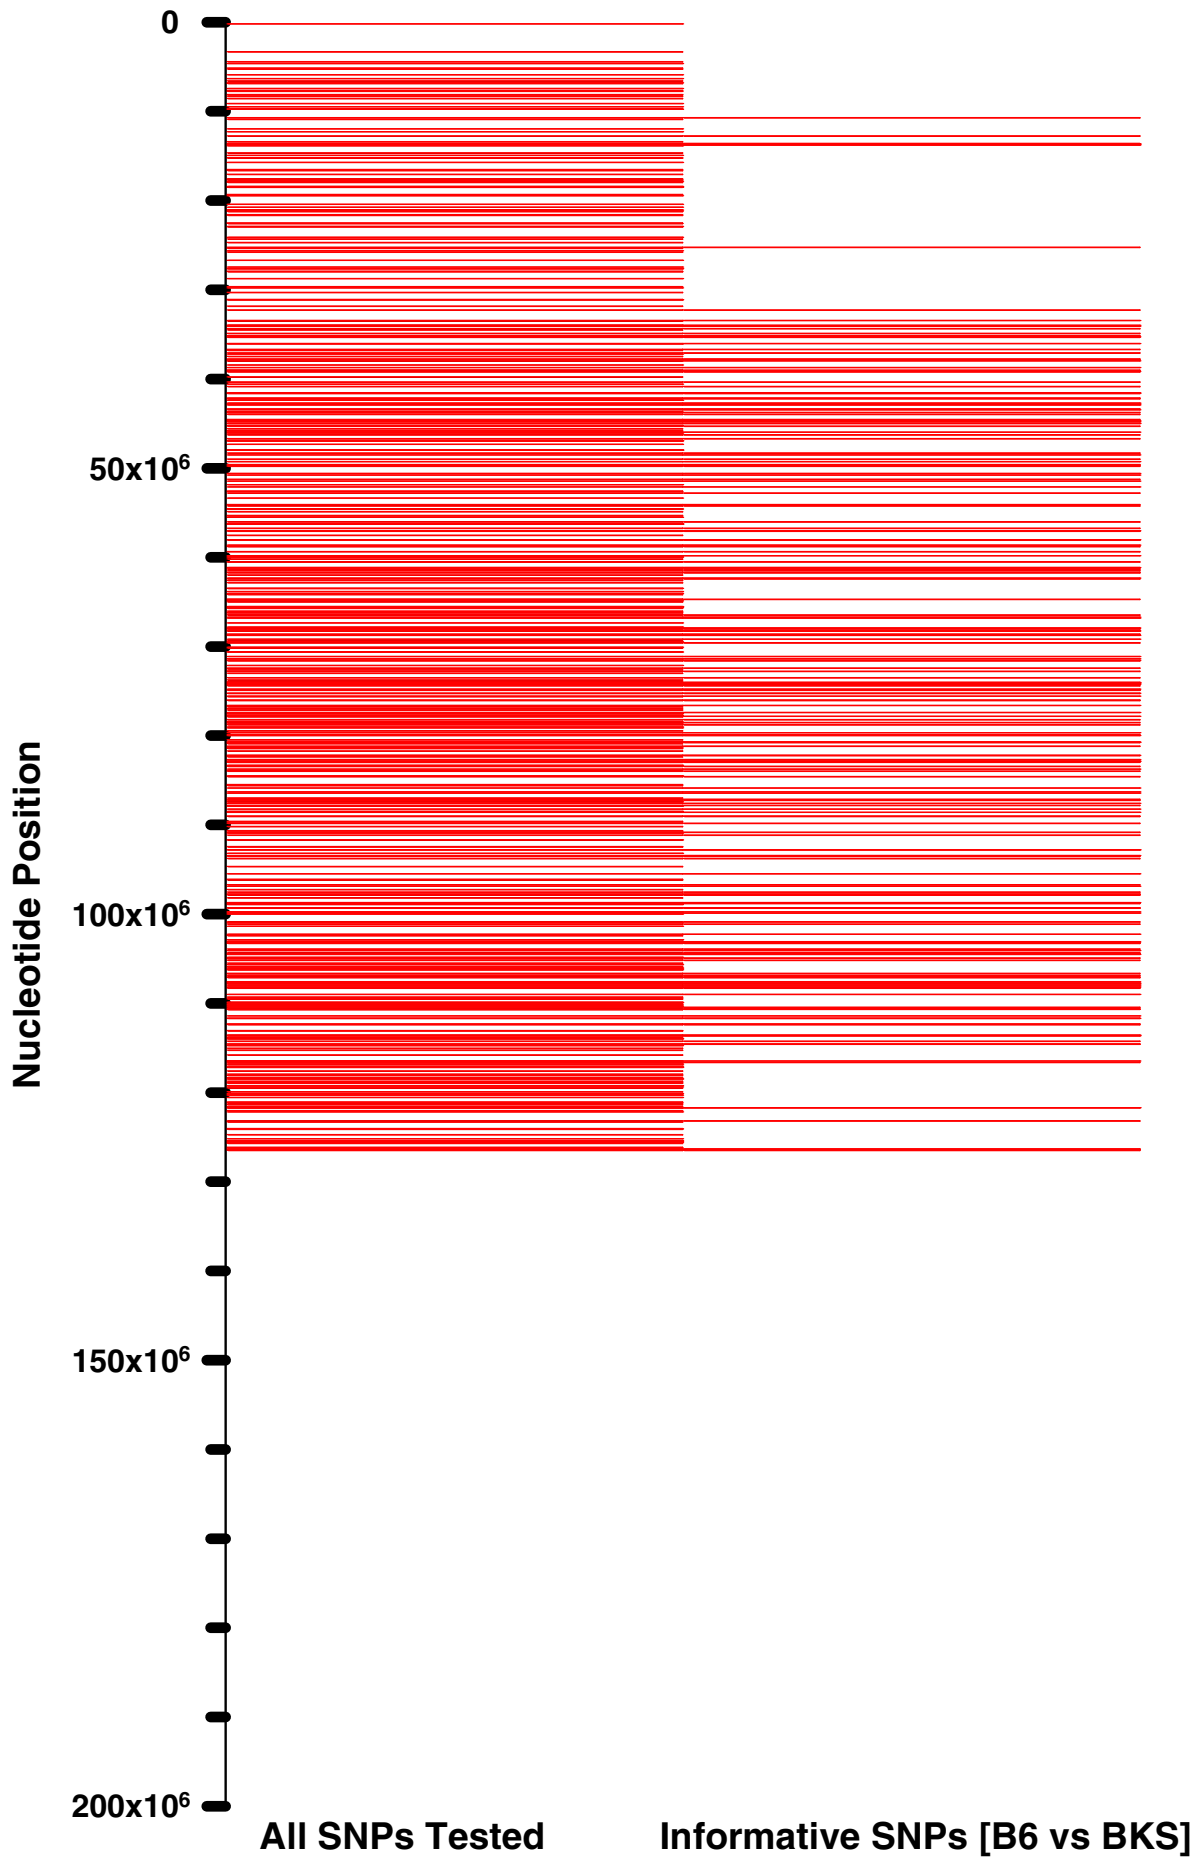

# Chromosome 10

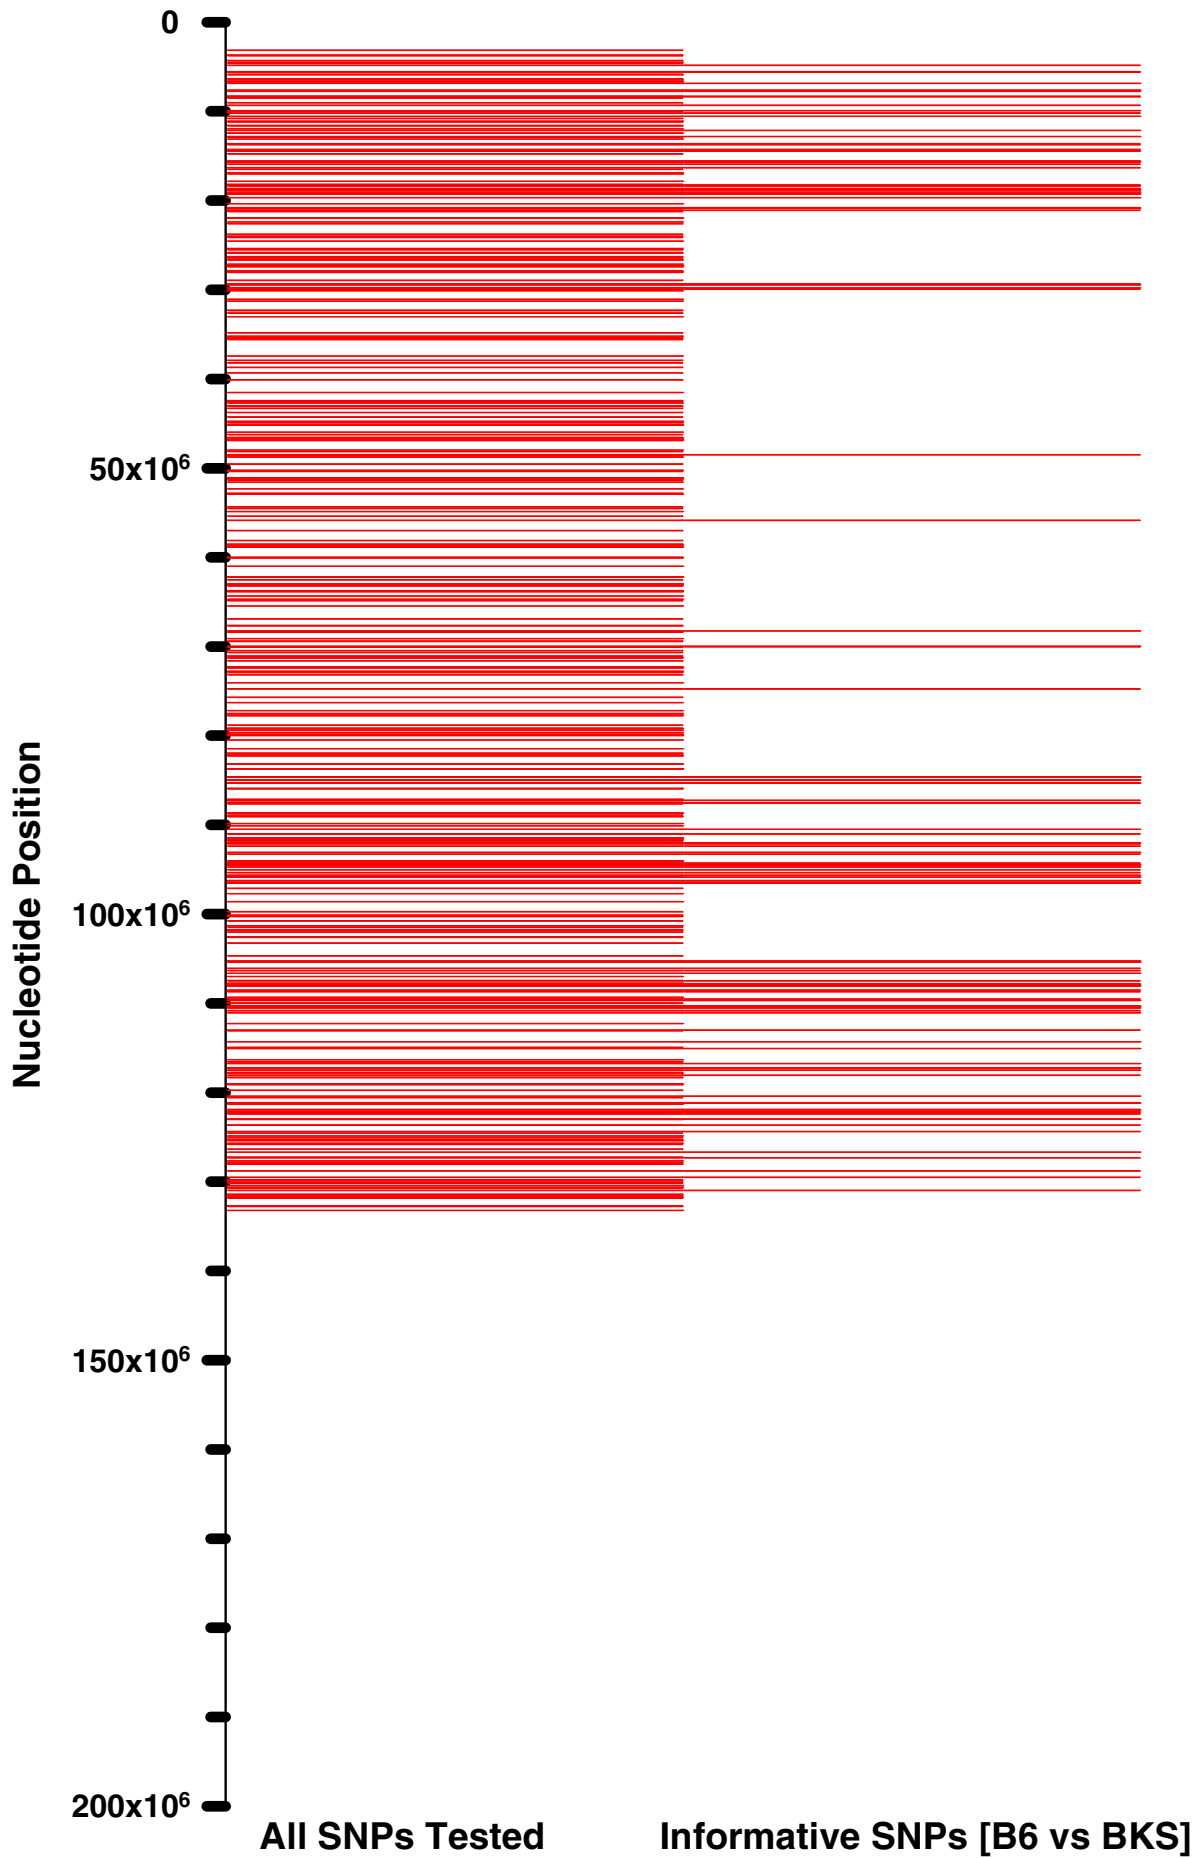

# Chromosome 11

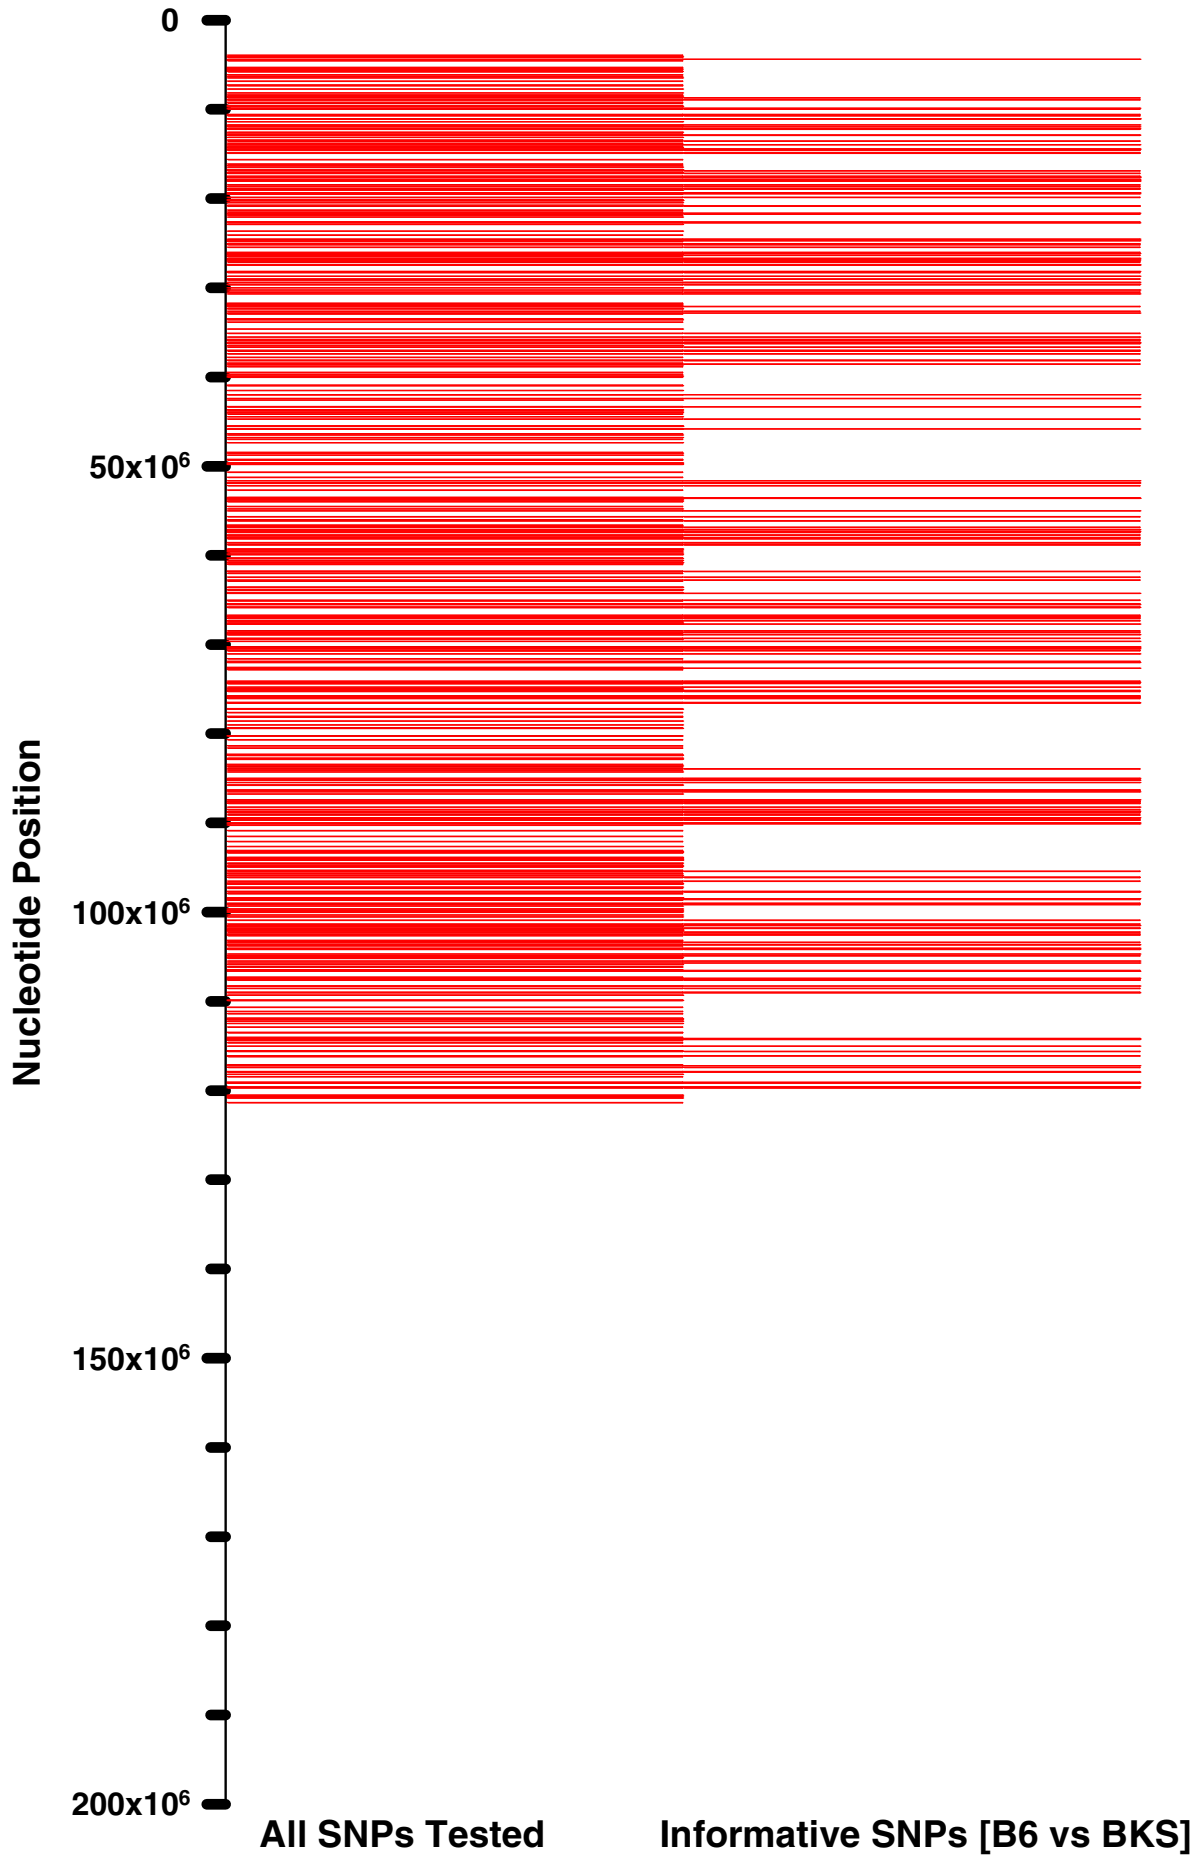

# Chromosome 12

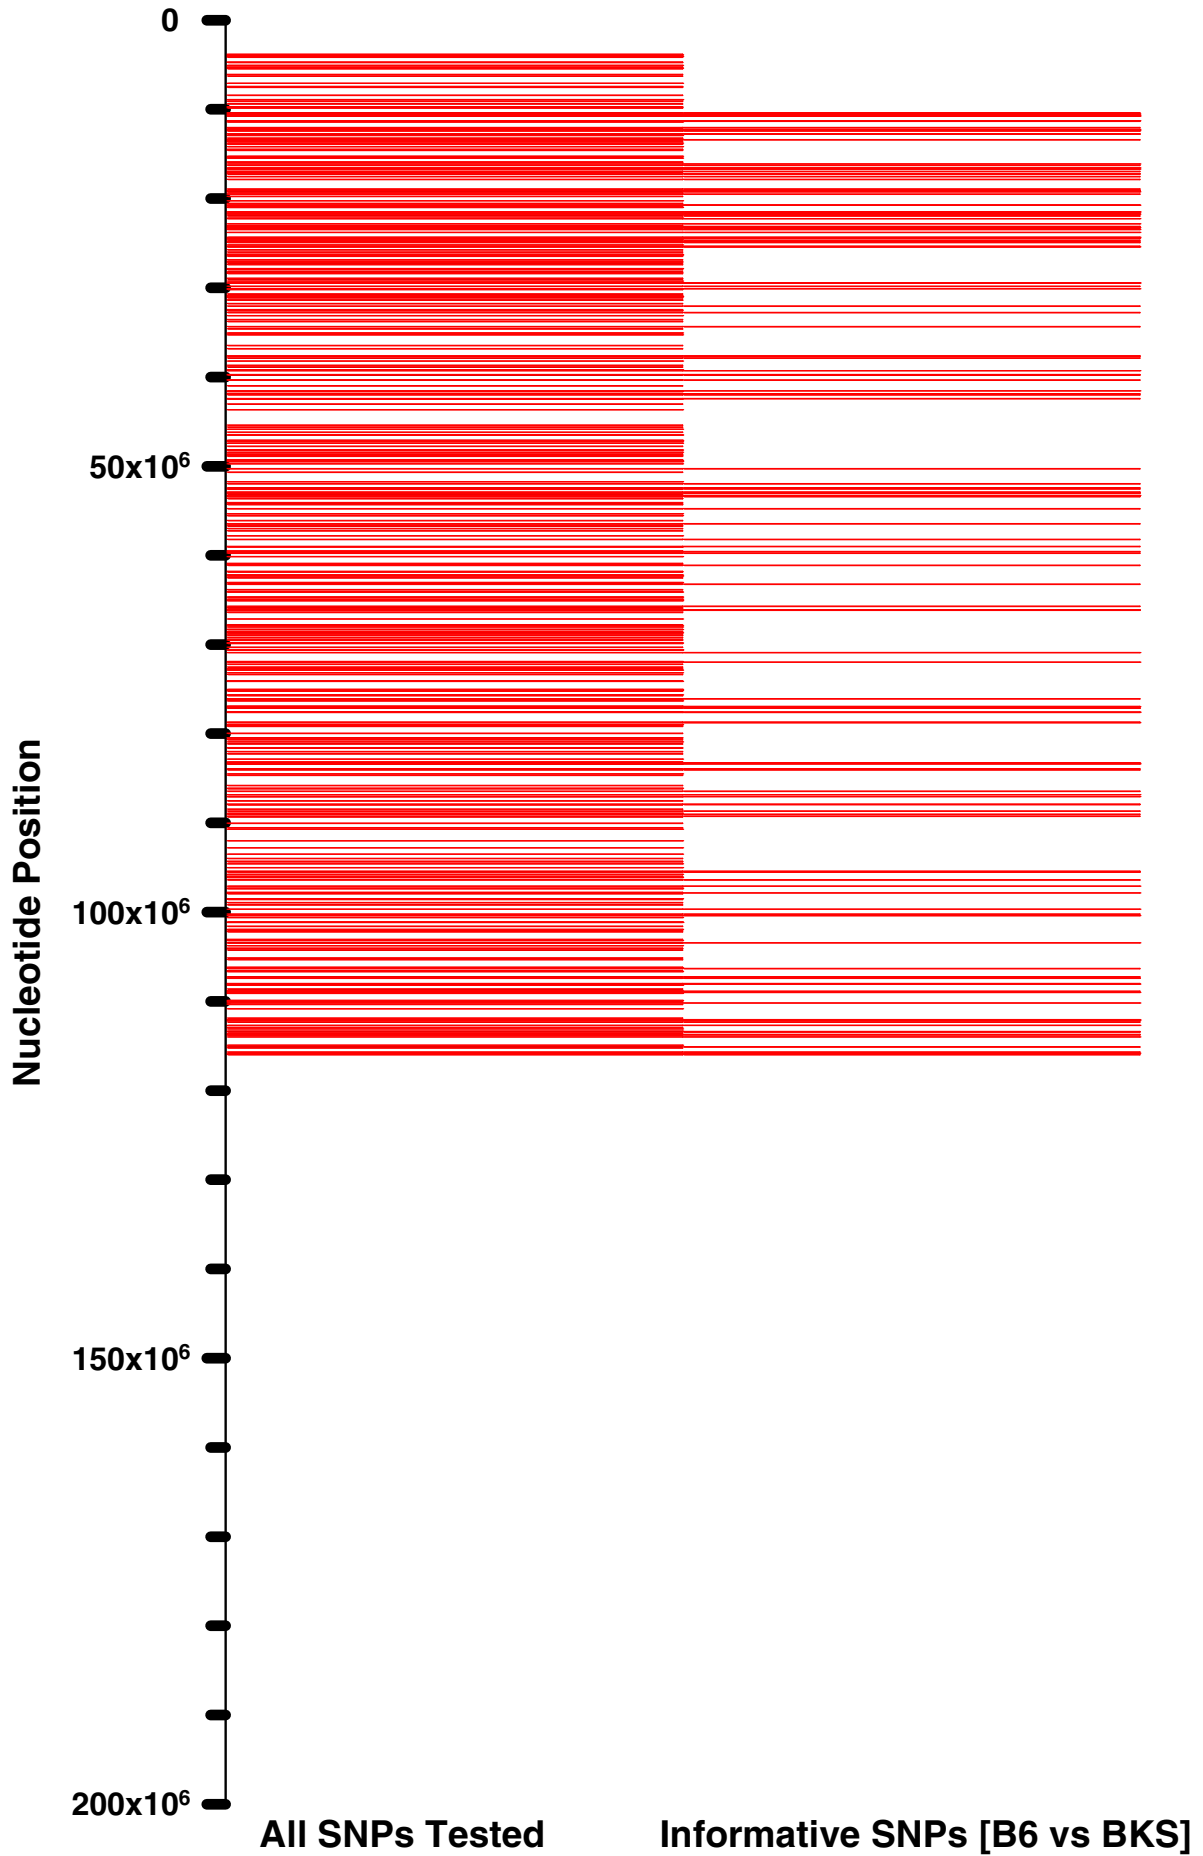

# Chromosome 13

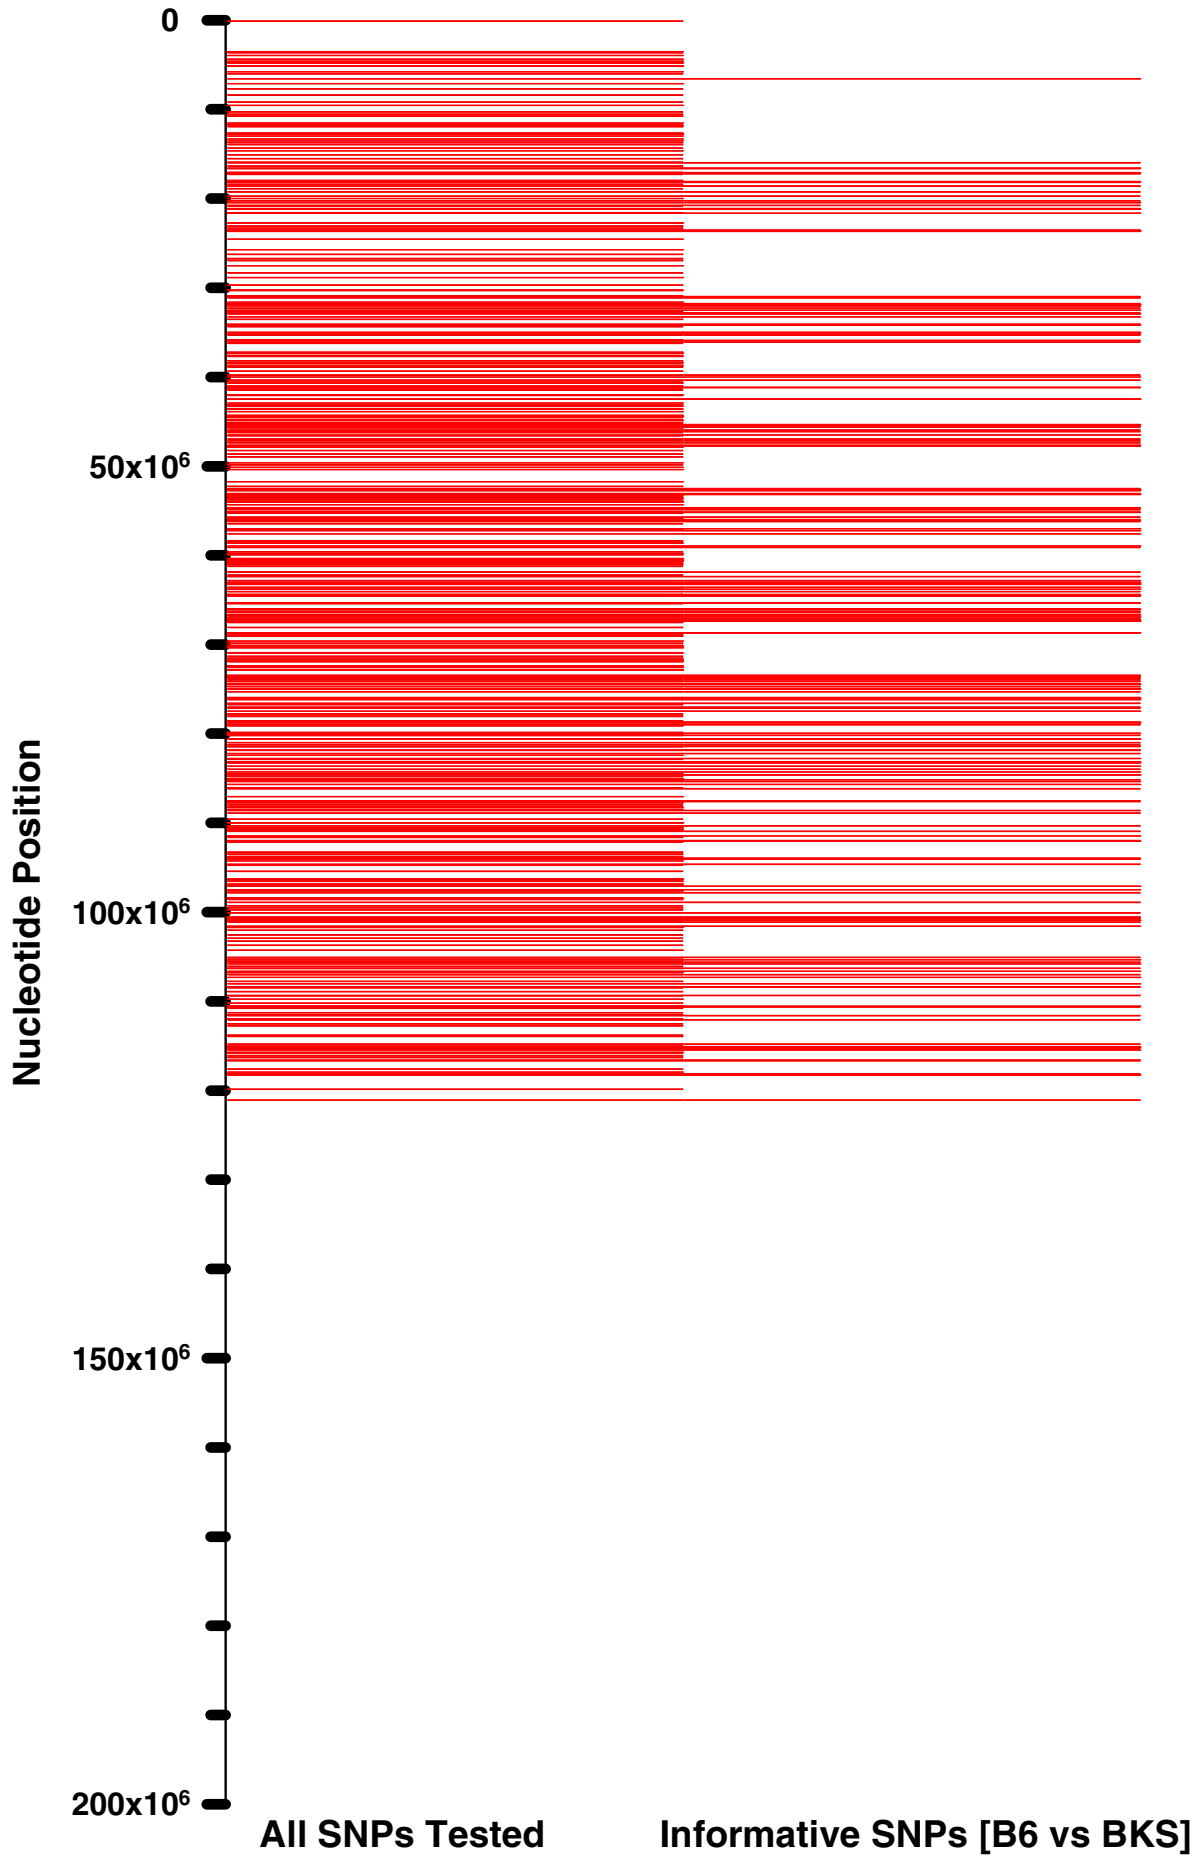

# Chromosome 14

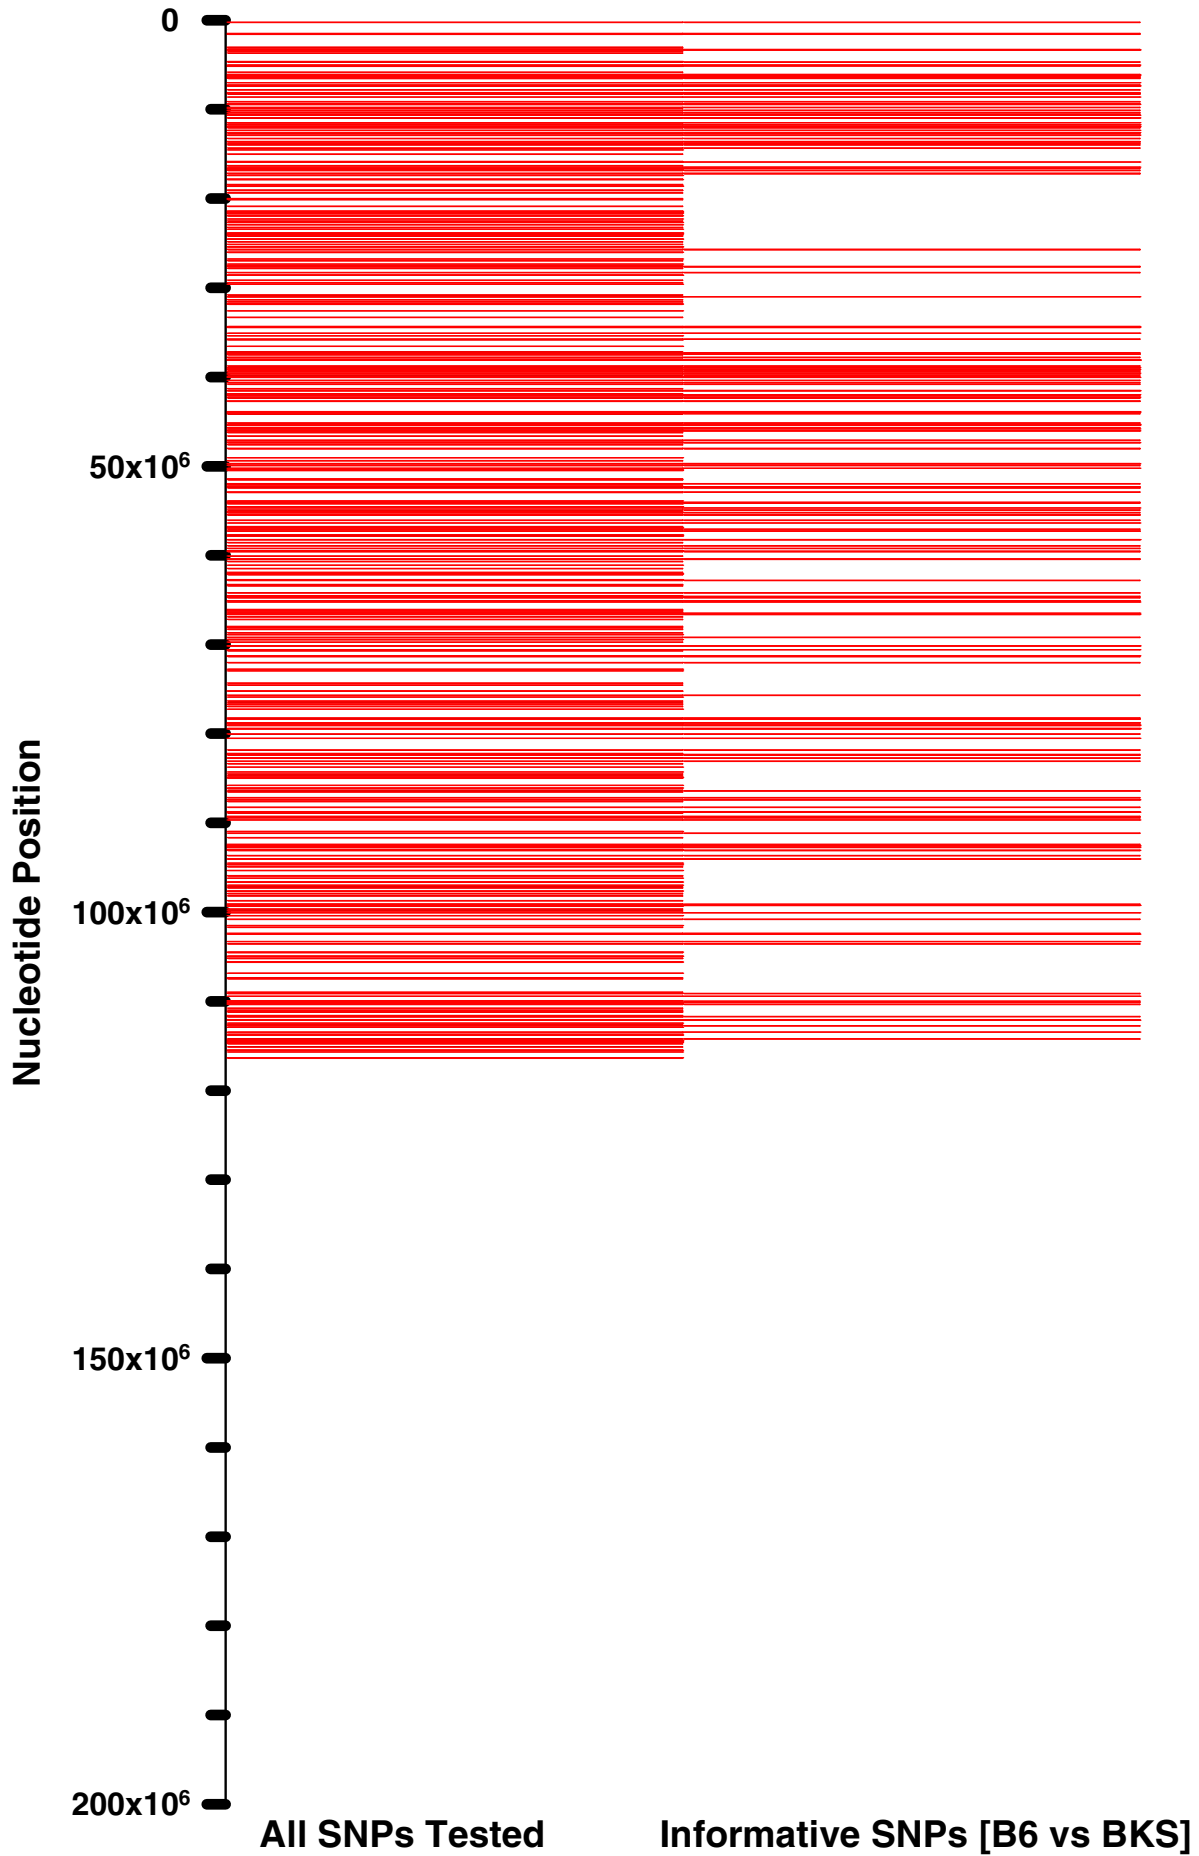

# Chromosome 15

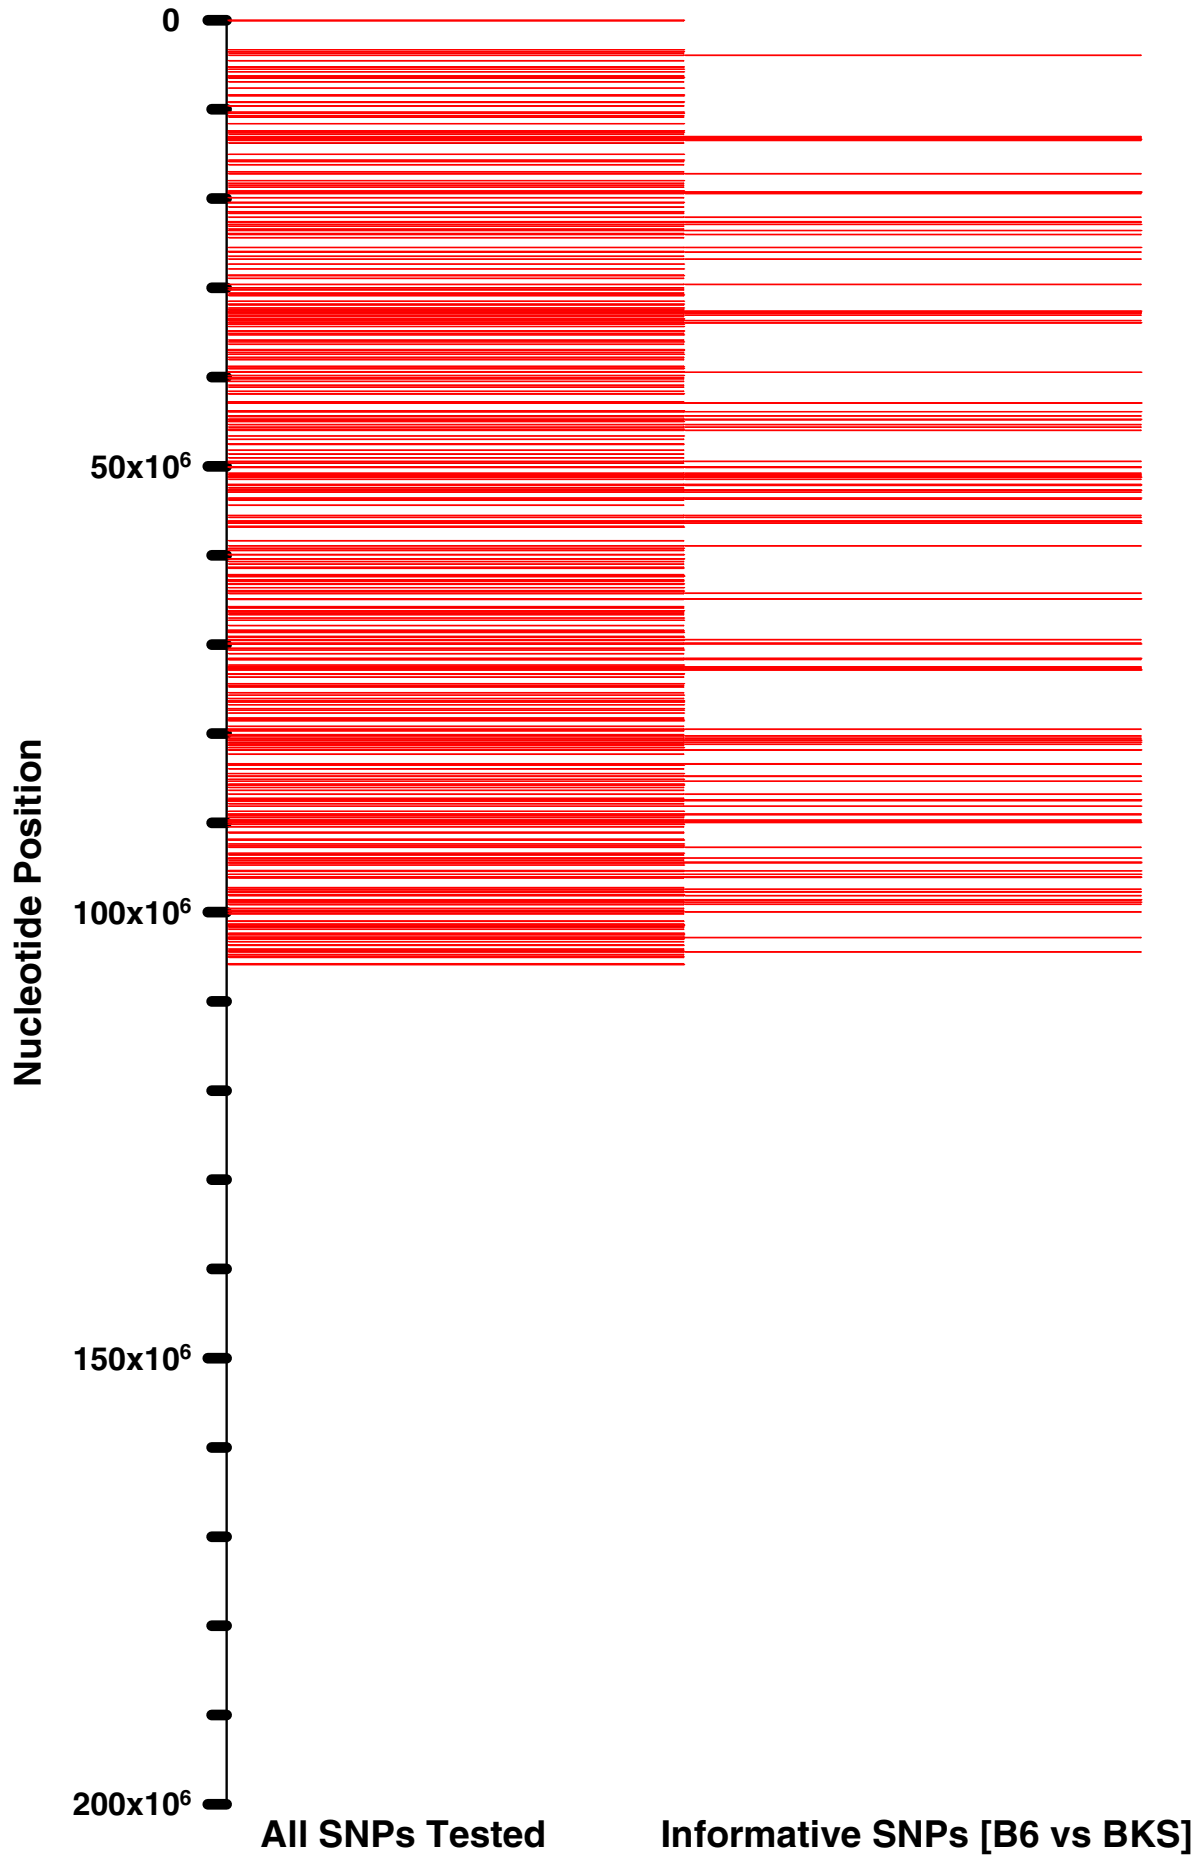

# Chromosome 16

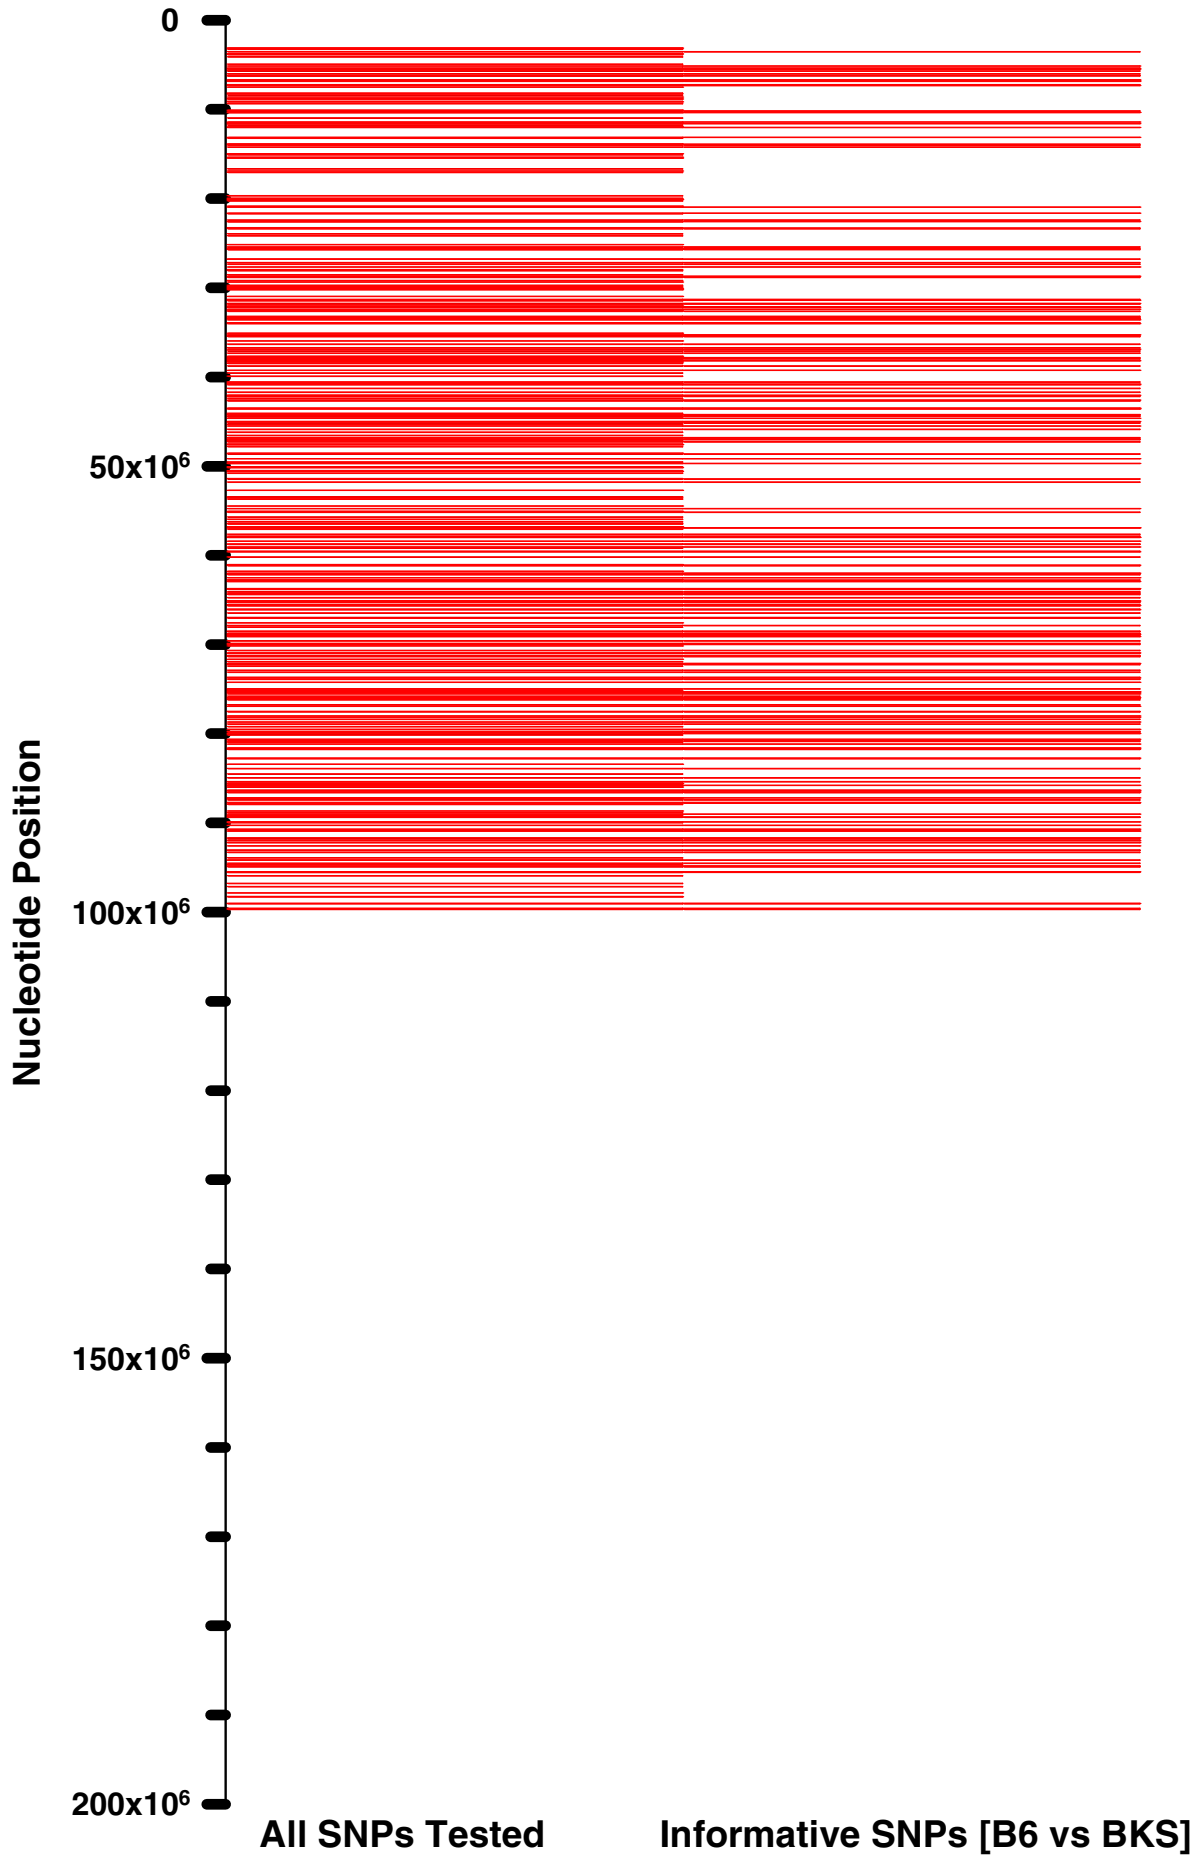

# Chromosome 17

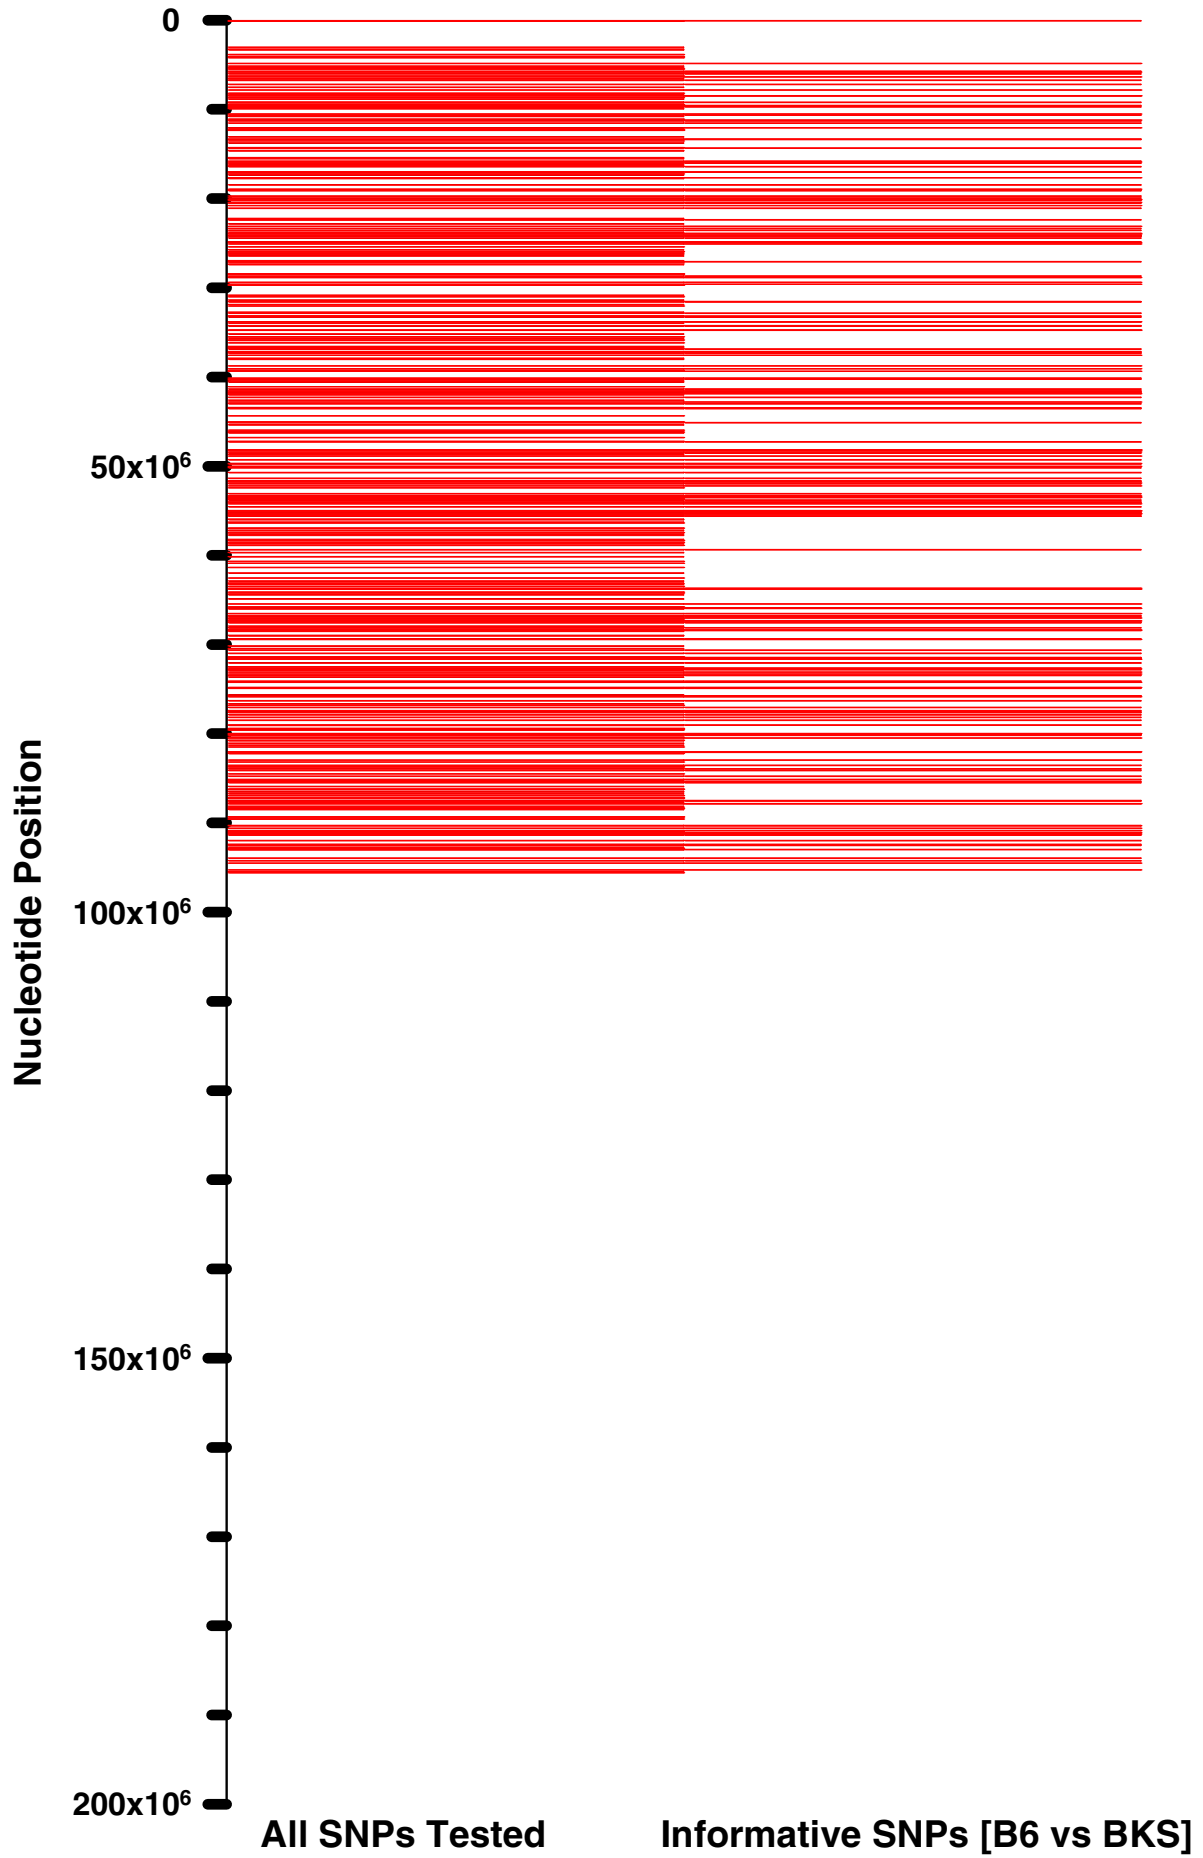

# Chromosome 18

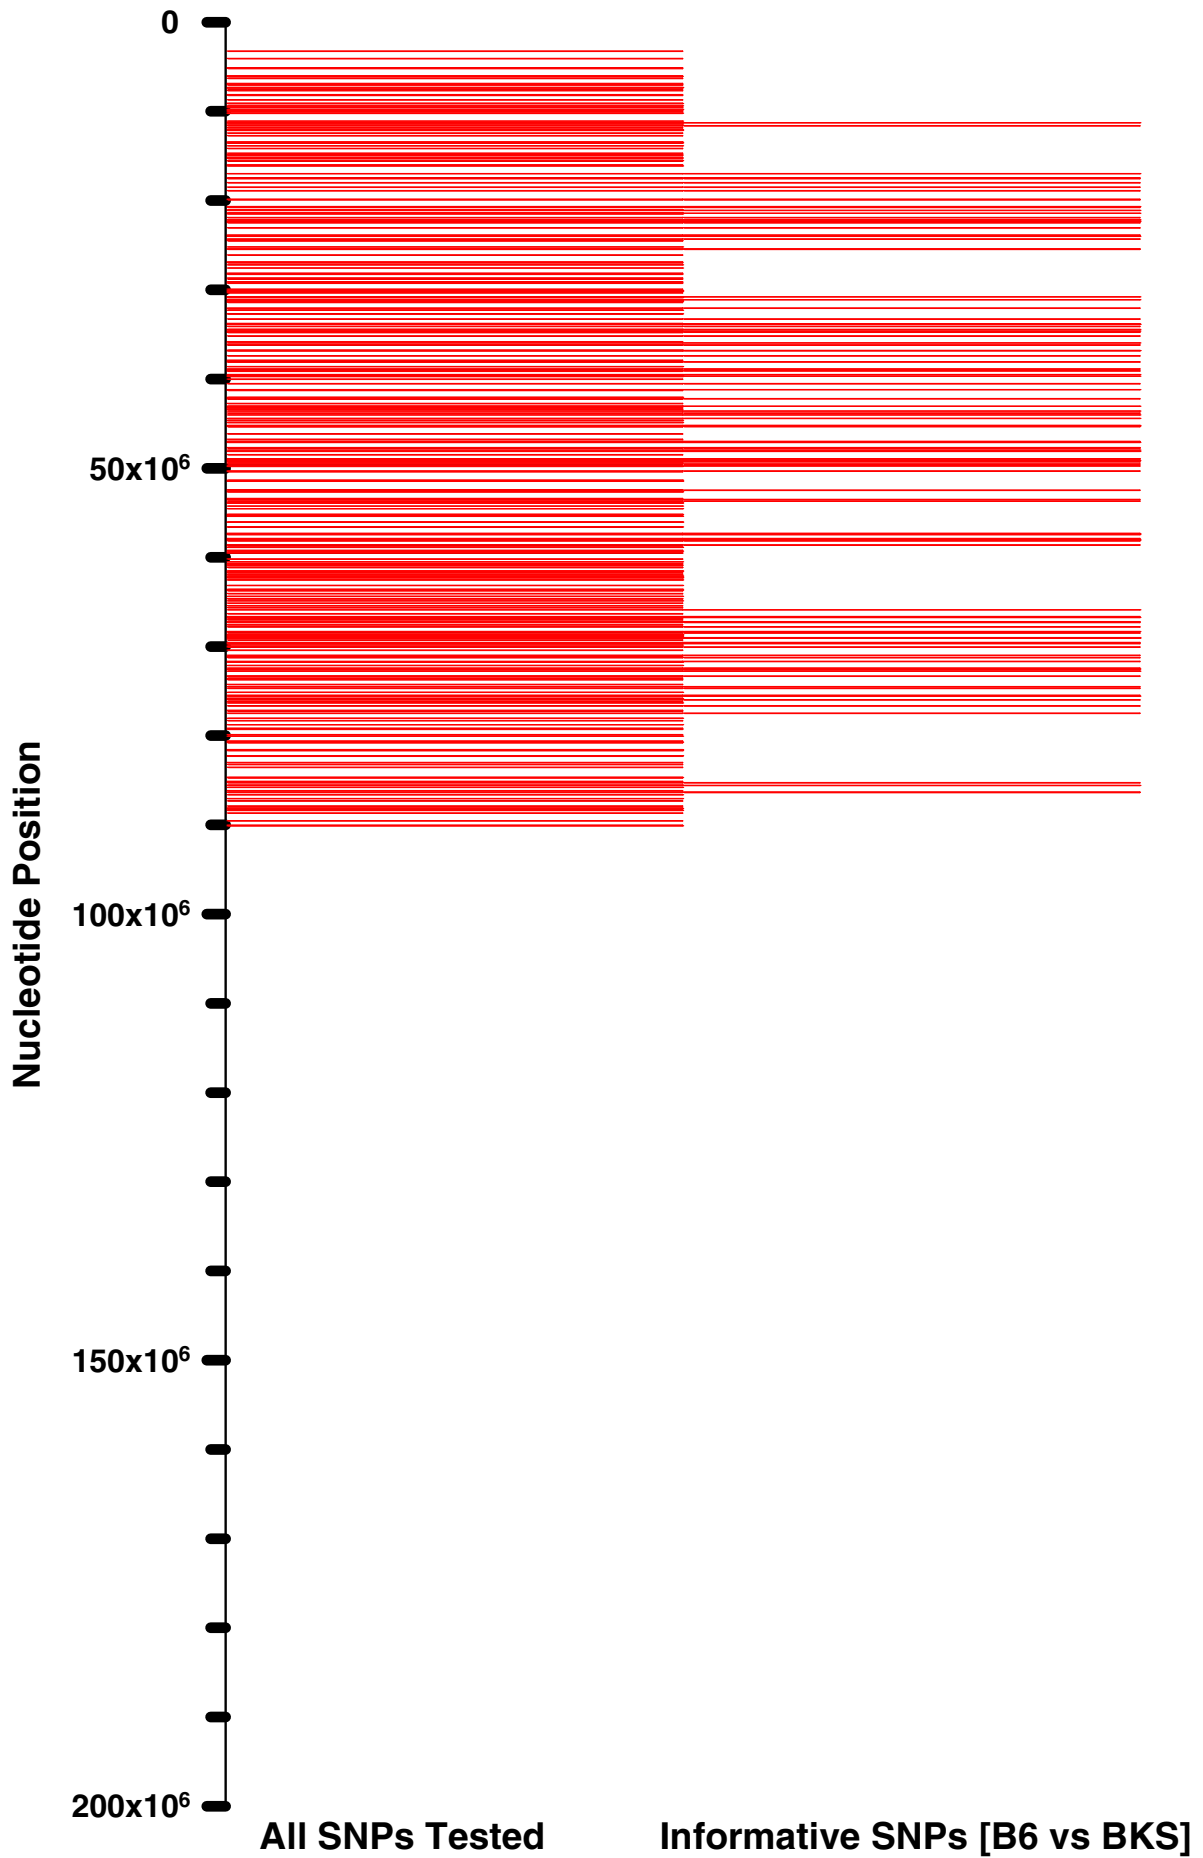

# Chromosome 19

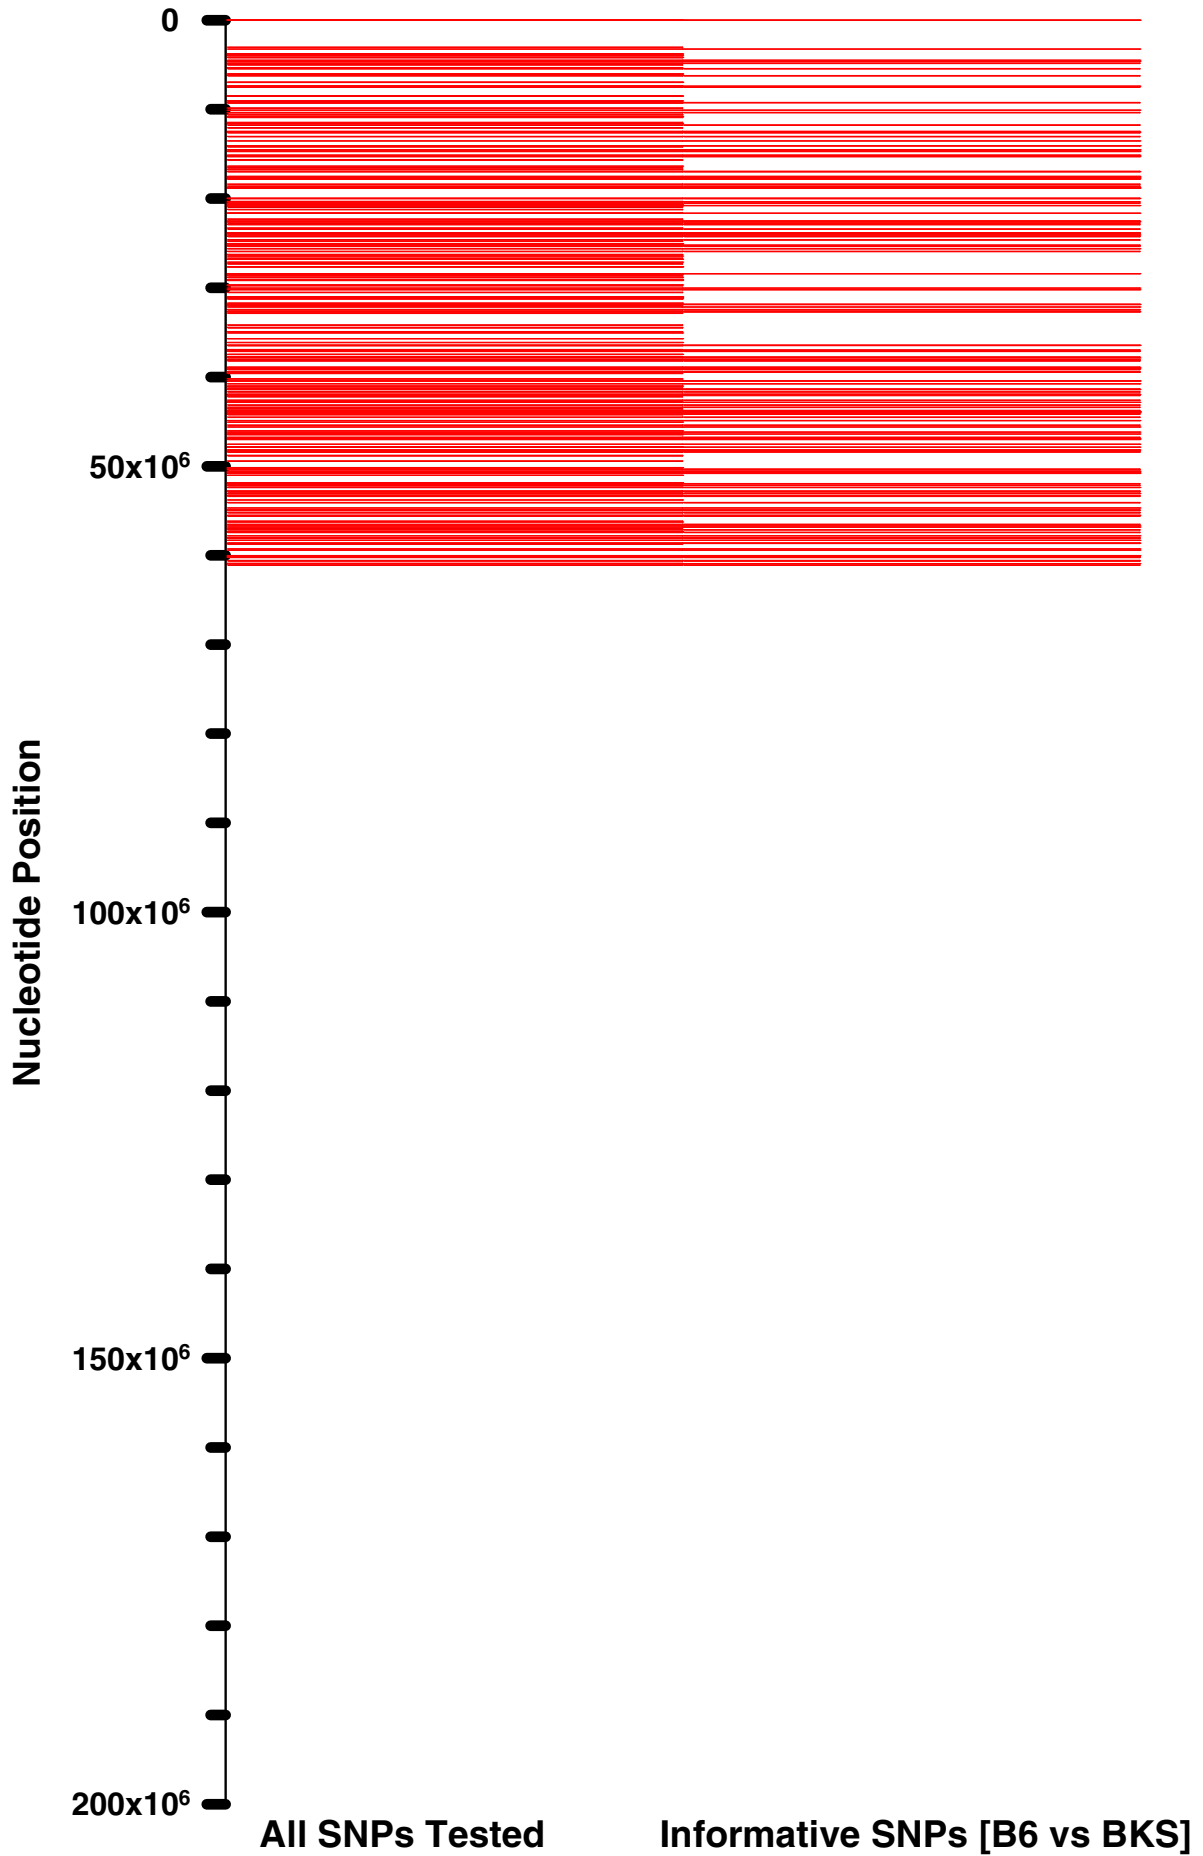

# Chromosome X

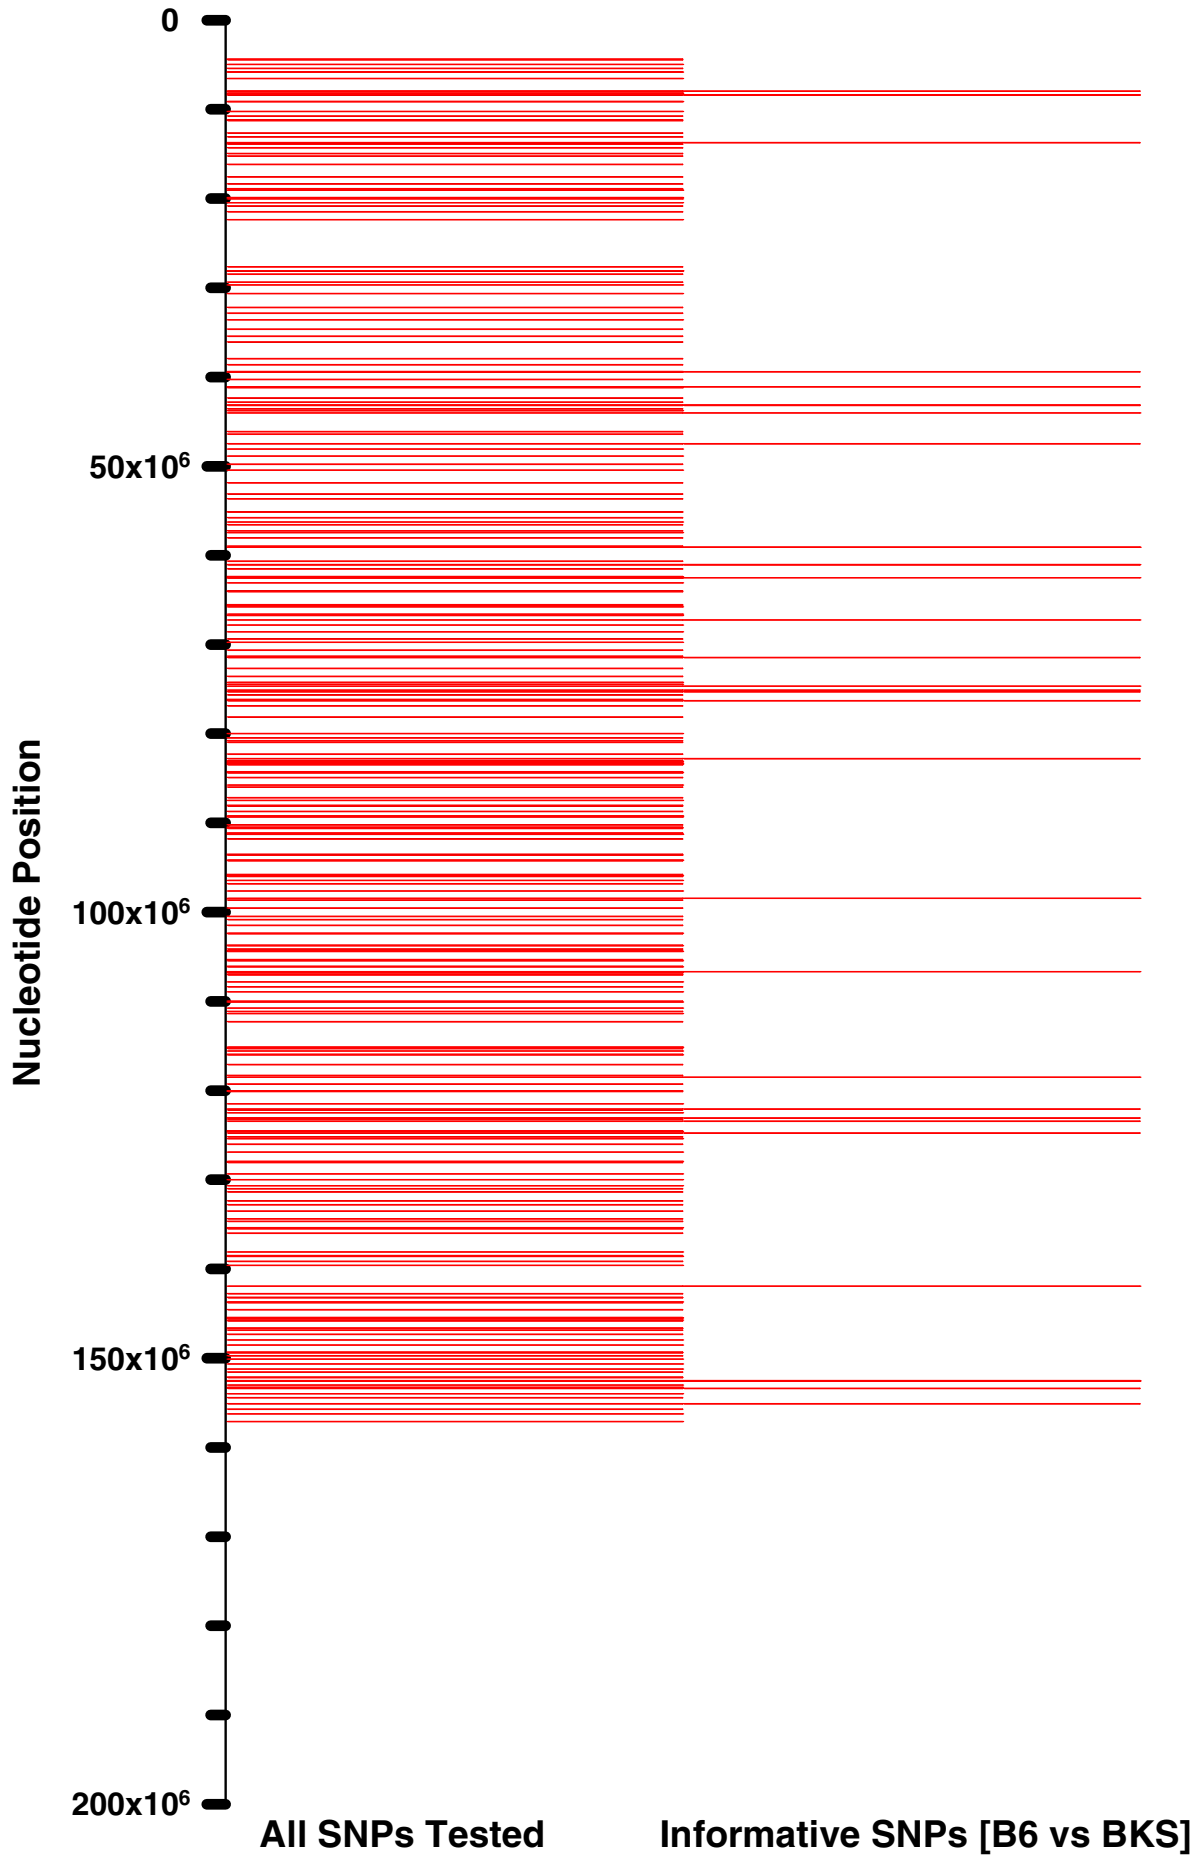

Supplement: pg1191DavisSupplementaryFigure2.pdf [file pg1191DavisSupplementaryFigure2.pdf]
