# Supplementary material
Source: HighWire-hosted journal article supplement (https://diabetes.diabetesjournals.org/content/suppl/2007/03/09/54.4.1191)
Supplement: pg1191DavisSupplementaryTable3.pdf [file pg1191DavisSupplementaryTable3.pdf]

**Table 3. *Cis*-Regulated Genes in DBA blocks of C57BLKS/J**

| Genbank ID                              | Gene Symbol          | Full Gene Name                                                                         | Correlated Phenotype Code (See - Supp.Table 5) | Gene Location bp   | Morgan Location | eQTL Location      | Lod         | r <sup>2</sup> |
|-----------------------------------------|----------------------|----------------------------------------------------------------------------------------|------------------------------------------------|--------------------|-----------------|--------------------|-------------|----------------|
| <b>Chromosome 1: 32.4 Mb to 72.3 Mb</b> |                      |                                                                                        |                                                |                    |                 |                    |             |                |
| 214854                                  | Lincr                | lung-inducible neuralized-related C3HC4 RING domain protein                            |                                                | 36,965,152         | 0.120           | 35,852,951         | 17.1        | 0.527          |
| <b>108991</b>                           | <b>1700001A24Rik</b> | <b>RIKEN cDNA 1700001A24 gene</b>                                                      | 28, 30                                         | <b>38,115,236</b>  | <b>0.129</b>    | <b>37,452,965</b>  | <b>7.6</b>  | <b>0.232</b>   |
| 22592                                   | Ercc5                | excision repair cross-complementing rodent repair deficiency, complementation group 5  |                                                | 45,050,855         | 0.249           | 52,560,431         | 6.7         | 0.296          |
| 227059                                  | Slc39a10             | solute carrier family 39 (zinc transporter), member 10                                 |                                                | 47,896,973         | 0.289           | 57,596,253         | 4.3         | 0.389          |
| <b>56363</b>                            | <b>Tmeff2</b>        | <b>transmembrane protein with EGF-like and two follistatin-like domains 2</b>          | 18, 25                                         | <b>52,090,466</b>  | <b>0.209</b>    | <b>47,524,609</b>  | <b>4.7</b>  | <b>0.220</b>   |
| <b>71724</b>                            | <b>Aox 3</b>         | <b>Aldehyde Oxidase 3</b>                                                              | 6, 18                                          | <b>59,646,711</b>  | <b>0.229</b>    | <b>50,042,520</b>  | <b>30.2</b> | <b>0.832</b>   |
| 71407                                   | 5230400C17Rik        | RIKEN cDNA 5230400C17 gene                                                             |                                                | 66,881,227         | 0.407           | 72,702,447         | 15.9        | 0.349          |
| 66646                                   | Rpe                  | ribulose-5-phosphate-3-epimerase                                                       |                                                | 68,278,842         | 0.289           | 57,596,253         | 11.8        | 0.462          |
| 75742                                   | 6820402A03Rik        | RIKEN cDNA 6820402A03 gene                                                             |                                                | 68,371,594         | 0.309           | 60,114,164         | 4.5         | 0.196          |
| 68691                                   | 1110028C15Rik        | RIKEN cDNA 1110028C15 gene                                                             |                                                | 68,375,269         | 0.349           | 65,149,986         | 10.6        | 0.321          |
| AW047739                                |                      | UI-M-BH1-alk-b-03-0-UI.s1 NIH_BMAP_M_S2 Mus musculus cDNA clone                        |                                                | 68,378,858         | 0.329           | 62,632,075         | 5.9         | 0.240          |
| <b>14768</b>                            | <b>Lanc1</b>         | <b>LanC (bacterial lantibiotic synthetase component C)-like 1</b>                      | 2, 10                                          | <b>68,584,791</b>  | <b>0.367</b>    | <b>67,466,963</b>  | <b>4.6</b>  | <b>0.143</b>   |
| <b>BE993185</b>                         |                      | <b>UI-M-BZ1-bjo-f-01-0-UI.s1 NIH_BMAP_MHI2_S1 Mus musculus cDNA clone</b>              | 3, 4, 5, 14, 17, 25, 27, 28, 31                | <b>69,627,504</b>  | <b>0.329</b>    | <b>62,632,075</b>  | <b>4.7</b>  | <b>0.194</b>   |
| <b>Chromosome 3: 99.7-124.3 Mb</b>      |                      |                                                                                        |                                                |                    |                 |                    |             |                |
| 68161                                   | A930005H10Rik        | RIKEN cDNA A930005H10 gene                                                             |                                                | 119,218,706        | 0.526           | 120,858,760        | 5.2         | 0.205          |
| 77559                                   | Agl                  | amylase-1,6-glucosidase, 4-alpha-glucanotransferase                                    |                                                | 120,075,293        | 0.506           | 116,523,599        | 27.9        | 0.770          |
| <b>Chromosome 3: 133.5-142.1 Mb</b>     |                      |                                                                                        |                                                |                    |                 |                    |             |                |
| <b>66357</b>                            | <b>2310008M10Rik</b> | <b>RIKEN cDNA 2310008M10 gene</b>                                                      | 13                                             | <b>134,305,000</b> | <b>0.684</b>    | <b>139,377,840</b> | <b>9.1</b>  | <b>0.292</b>   |
| 73284                                   | Ddit4l               | DNA-damage-inducible transcript 4-like                                                 |                                                | 141,548,960        | 0.684           | 139,377,840        | 9.9         | 0.262          |
| 68369                                   | 0610031O16Rik        | RIKEN cDNA 0610031O16 gene                                                             |                                                | 142,135,173        | 0.684           | 139,377,840        | 13.5        | 0.441          |
| <b>Chromosome 5: 3.6-23.2 Mb</b>        |                      |                                                                                        |                                                |                    |                 |                    |             |                |
| 13121                                   | Cyp51                | cytochrome P450, 51                                                                    |                                                | 4,095,450          | 0.147           | 15,565,460         | 16.1        | 0.444          |
| 20349                                   | Sema3e               | sema domain, immunoglobulin domain (Ig), short basic domain, secreted, (semaphorin) 3E |                                                | 12,634,678         | 0.207           | 24,773,111         | 18.0        | 0.445          |
| 212167                                  | A530088I07Rik        | RIKEN cDNA A530088I07 gene                                                             |                                                | 19,283,591         | 0.187           | 21,703,894         | 23.9        | 0.666          |
| 22791                                   | Dnajc2               | DnaJ (Hsp40) homolog, subfamily C, member 2                                            |                                                | 19,858,266         | 0.147           | 15,565,460         | 6.3         | 0.201          |
| 66587                                   | Fastk                | Fas-activated serine/threonine kinase                                                  |                                                | 22,598,211         | 0.207           | 24,773,111         | 21.0        | 0.589          |
| 64295                                   | 2010004O20Rik        | RIKEN cDNA 2010004O20 gene                                                             |                                                | 22,602,635         | 0.207           | 24,773,111         | 10.6        | 0.491          |
| <b>69959</b>                            | <b>2810013C04Rik</b> | <b>RIKEN cDNA 2810013C04 gene</b>                                                      | 13                                             | <b>22,752,981</b>  | <b>0.147</b>    | <b>15,565,460</b>  | <b>5.5</b>  | <b>0.215</b>   |
| 269633                                  | 2810046M22Rik        | RIKEN cDNA 2810046M22 gene                                                             |                                                | 22,868,018         | 0.120           | 17,327,972         | 21.0        | 0.585          |
| <b>Chromosome 6: 116.1-150.5 Mb</b>     |                      |                                                                                        |                                                |                    |                 |                    |             |                |
| 68465                                   | D6Ucla1e             | DNA segment, Chr 6, University of California at Los Angeles-1, expressed               |                                                | 121,013,016        | 0.494           | 117,578,538        | 6.6         | 0.200          |
| 22419                                   | Wnt5b                | wingless-related MMTV integration site 5B                                              |                                                | 121,090,232        | 0.534           | 124,163,740        | 8.5         | 0.260          |
| 17000                                   | Ltbr                 | lymphotoxin B receptor                                                                 |                                                | 127,249,033        | 0.574           | 130,748,943        | 4.9         | 0.189          |
| 72440                                   | 5930416I19Rik        | RIKEN cDNA 5930416I19 gene                                                             |                                                | 130,302,391        | 0.631           | 138,862,497        | 11.8        | 0.361          |
| 16638                                   | Klra7                | killer cell lectin-like receptor, subfamily A, member 7                                |                                                | 132,211,147        | 0.611           | 136,899,460        | 9.6         | 0.319          |
| <b>66441</b>                            | <b>2010012C16Rik</b> | <b>RIKEN cDNA 2010012C16 gene</b>                                                      | 10, 22                                         | <b>132,903,136</b> | <b>0.594</b>    | <b>134,041,544</b> | <b>12.8</b> | <b>0.346</b>   |

**Table 3. *Cis*-Regulated Genes in DBA blocks of C57BLKS/J**

| Genbank ID                          | Gene Symbol          | Full Gene Name                                                                  | Correlated Phenotype Code (See - Supp.Table 5) | Gene Location bp   | Morgan Location | eQTL Location      | Lod         | r <sup>2</sup> |
|-------------------------------------|----------------------|---------------------------------------------------------------------------------|------------------------------------------------|--------------------|-----------------|--------------------|-------------|----------------|
| 381820                              | 2700089E24Rik        | RIKEN cDNA 2700089E24 gene                                                      |                                                | 134,525,672        | 0.611           | 136,899,460        | 11.7        | 0.338          |
| 73661                               | 2210419D22Rik        | RIKEN cDNA 2210419D22 gene                                                      |                                                | 135,851,694        | 0.594           | 134,041,544        | 12.3        | 0.359          |
| <b>16974</b>                        | <b>Lrp6</b>          | <b>low density lipoprotein receptor-related protein 6</b>                       | 4, 17, 20, 25                                  | <b>135,855,415</b> | <b>0.594</b>    | <b>134,041,544</b> | <b>28.2</b> | <b>0.607</b>   |
| 67774                               | Loh12cr1             | RIKEN cDNA 5830457J20 gene                                                      |                                                | 136,042,183        | 0.594           | 134,041,544        | 22.0        | 0.555          |
| 70686                               | Dusp16               | dual specificity phosphatase 16                                                 |                                                | 136,117,206        | 0.611           | 136,899,460        | 35.6        | 0.730          |
| 14760                               | Gpr19                | G protein-coupled receptor 19                                                   |                                                | 136,271,540        | 0.611           | 136,899,460        | 12.7        | 0.395          |
| 74525                               | 8430419L09Rik        | RIKEN cDNA 8430419L09 gene                                                      |                                                | 136,605,974        | 0.631           | 138,862,497        | 5.2         | 0.182          |
| 76012                               | 5830415B17Rik        | RIKEN cDNA 5830415B17 gene                                                      |                                                | 137,994,361        | 0.654           | 141,129,806        | 7.4         | 0.224          |
| 72488                               | 2610204M12Rik        | RIKEN cDNA 2610204M12 gene                                                      |                                                | 138,050,400        | 0.631           | 138,862,497        | 9.1         | 0.273          |
| 78600                               | Pde6h                | phosphodiesterase 6H, cGMP-specific, cone, gamma                                |                                                | 138,394,008        | 0.631           | 138,862,497        | 6.7         | 0.184          |
| <b>18705</b>                        | <b>Pik3c2g</b>       | <b>phosphatidylinositol 3-kinase, C2 domain containing, gamma polypeptide</b>   | 13, 15                                         | <b>141,038,165</b> | <b>0.651</b>    | <b>140,825,535</b> | <b>21.1</b> | <b>0.568</b>   |
| 71323                               | 5133400D11Rik        | RIKEN cDNA 5133400D11 gene                                                      |                                                | 147,364,264        | 0.719           | 147,471,812        | 12.5        | 0.402          |
| <b>67623</b>                        | <b>Tm7sf3</b>        | <b>transmembrane 7 superfamily member 3</b>                                     | 8, 10, 20                                      | <b>148,125,106</b> | <b>0.719</b>    | <b>147,471,812</b> | <b>23.2</b> | <b>0.588</b>   |
| <b>232533</b>                       | <b>Stk38l</b>        | <b>serine/threonine kinase 38 like</b>                                          | 17                                             | <b>148,294,011</b> | <b>0.719</b>    | <b>147,471,812</b> | <b>7.8</b>  | <b>0.198</b>   |
| 66184                               | 1110033J19Rik        | RIKEN cDNA 1110033J19 gene                                                      |                                                | 149,867,701        | 0.694           | 145,055,881        | 12.3        | 0.362          |
| <b>Chromosome 7: 103.1-137.2 Mb</b> |                      |                                                                                 |                                                |                    |                 |                    |             |                |
| 70349                               | Copb1                | coatomer protein complex, subunit beta 1                                        |                                                | 106,136,942        | 0.672           | 105,612,812        | 9.4         | 0.310          |
| BE994641                            |                      | UI-M-BZ1-bjw-g-08-0-UI.s1 NIH_BMAP_MHI2_S1 Mus musculus cDNA clone              |                                                | 108,175,561        | 0.712           | 110,395,495        | 5.0         | 0.161          |
| 18704                               | Pik3c2a              | phosphatidylinositol 3-kinase, C2 domain containing, alpha polypeptide          |                                                | 108,382,549        | 0.712           | 110,395,495        | 7.0         | 0.229          |
| <b>54208</b>                        | <b>Arl6ip1</b>       | <b>ADP-ribosylation factor-like 6 interacting protein 1</b>                     | 3, 4, 5, 7, 13, 14, 17, 19, 26, 27, 31         | <b>110,053,765</b> | <b>0.776</b>    | <b>113,775,240</b> | <b>8.2</b>  | <b>0.253</b>   |
| <b>233789</b>                       | <b>2610207I05Rik</b> | <b>RIKEN cDNA 2610207I05 gene</b>                                               | 10, 16, 24                                     | <b>110,066,324</b> | <b>0.753</b>    | <b>111,762,992</b> | <b>5.2</b>  | <b>0.162</b>   |
| 74424                               | Tmc5                 | transmembrane channel-like gene family 5                                        |                                                | 110,659,132        | 0.712           | 110,395,495        | 11.8        | 0.370          |
| <b>71830</b>                        | <b>1700007B13Rik</b> | <b>RIKEN cDNA 1700007B13 gene</b>                                               | 16                                             | <b>111,466,930</b> | <b>0.753</b>    | <b>111,762,992</b> | <b>11.8</b> | <b>0.338</b>   |
| <b>233802</b>                       | <b>Thumpd1</b>       | <b>THUMP domain containing 1</b>                                                | 12, 22                                         | <b>111,695,443</b> | <b>0.733</b>    | <b>111,096,201</b> | <b>23.6</b> | <b>0.599</b>   |
| 233806                              | 8430420C20Rik        | RIKEN cDNA 8430420C20 gene                                                      |                                                | 112,082,725        | 0.756           | 111,894,555        | 8.8         | 0.249          |
| <b>12971</b>                        | <b>Crym</b>          | <b>crystallin, mu</b>                                                           | 13                                             | <b>112,215,775</b> | <b>0.733</b>    | <b>111,096,201</b> | <b>55.9</b> | <b>0.915</b>   |
| 12176                               | Bnip3                | BCL2/adenovirus E1B 19kDa-interacting protein 1, NIP3                           |                                                | 130,789,828        | 0.931           | 128,359,953        | 6.6         | 0.202          |
| <b>Chromosome 8: 57.0-84.8 Mb</b>   |                      |                                                                                 |                                                |                    |                 |                    |             |                |
| 72281                               | Sh2d4a               | RIKEN cDNA 2210402M20 gene                                                      |                                                | 68,281,999         | 0.120           | 64,814,639         | 23.9        | 0.608          |
| <b>70885</b>                        | <b>4921521J11Rik</b> | <b>RIKEN cDNA 4921521J11 gene</b>                                               | 19                                             | <b>68,795,338</b>  | <b>0.167</b>    | <b>74,188,285</b>  | <b>18.2</b> | <b>0.549</b>   |
| 234358                              | D10627               | cDNA sequence D10627                                                            |                                                | 69,336,498         | 0.140           | 69,926,227         | 26.6        | 0.469          |
| 66869                               | 1200003I07Rik        | RIKEN cDNA 1200003I07 gene                                                      |                                                | 69,890,743         | 0.147           | 71,613,052         | 17.1        | 0.443          |
| 53978                               | Edg4                 | endothelial differentiation, lysophosphatidic acid G-protein-coupled receptor 4 |                                                | 70,018,562         | 0.147           | 71,613,052         | 13.0        | 0.330          |
| 80720                               | Pbx4                 | pre-B-cell leukemia transcription factor 4                                      |                                                | 70,028,754         | 0.147           | 71,613,052         | 24.1        | 0.624          |
| <b>234366</b>                       | <b>BC031407</b>      | <b>cDNA sequence BC031407</b>                                                   | 7, 19                                          | <b>70,108,764</b>  | <b>0.147</b>    | <b>71,613,052</b>  | <b>8.4</b>  | <b>0.280</b>   |
| BE984996                            |                      | UI-M-CG0p-bdg-b-05-0-UI.s1 NIH_BMAP_Ret4_S2 Mus musculus cDNA clone             | 7                                              | <b>70,342,954</b>  | <b>0.140</b>    | <b>69,926,227</b>  | <b>7.7</b>  | <b>0.267</b>   |
| <b>19704</b>                        | <b>Rent1</b>         | <b>regulator of nonsense transcripts 1</b>                                      | 7                                              | <b>70,529,415</b>  | <b>0.120</b>    | <b>64,814,639</b>  | <b>10.4</b> | <b>0.386</b>   |

**Table 3. *Cis*-Regulated Genes in DBA blocks of C57BLKS/J**

| Genbank ID                          | Gene Symbol   | Full Gene Name                                                         | Correlated Phenotype Code (See - Supp.Table 5)          | Gene Location bp | Morgan Location | eQTL Location | Lod  | r <sup>2</sup> |
|-------------------------------------|---------------|------------------------------------------------------------------------|---------------------------------------------------------|------------------|-----------------|---------------|------|----------------|
| 66462                               | 2810428115Rik | RIKEN cDNA 2810428115 gene                                             | 15                                                      | 70,771,401       | 0.120           | 64,814,639    | 11.8 | 0.344          |
| 50783                               | Lsm4          | LSM4 homolog, U6 small nuclear RNA associated ( <i>S. cerevisiae</i> ) | 6, 10, 18, 22                                           | 70,941,644       | 0.147           | 71,613,052    | 9.0  | 0.257          |
| 110385                              | Pde4c         | phosphodiesterase 4C, cAMP specific                                    | 15                                                      | 71,018,900       | 0.100           | 59,703,050    | 7.5  | 0.290          |
| 77090                               | 9430098E02Rik | RIKEN cDNA 9430098E02 gene                                             | 13                                                      | 71,696,823       | 0.120           | 64,814,639    | 36.8 | 0.849          |
| 234407                              | Git25d1       | glycosyltransferase 25 domain containing 1                             | 7, 19                                                   | 71,948,367       | 0.120           | 64,814,639    | 7.5  | 0.256          |
| 73695                               | 2410078G03Rik | RIKEN cDNA 2410078G03 gene                                             | 1, 15                                                   | 72,045,393       | 0.167           | 74,188,285    | 5.7  | 0.197          |
| 16453                               | Jak3          | Janus kinase 3                                                         |                                                         | 72,063,386       | 0.147           | 71,613,052    | 6.2  | 0.196          |
| 170938                              | Zfp617        | zinc finger protein 617                                                |                                                         | 72,319,073       | 0.147           | 71,613,052    | 5.9  | 0.201          |
| 326618                              | Tpm4          | tropomyosin 4                                                          |                                                         | 72,550,464       | 0.167           | 74,188,285    | 5.4  | 0.201          |
| 17274                               | Rab8a         | RAB8A, member RAS oncogene family                                      |                                                         | 72,576,489       | 0.147           | 71,613,052    | 13.0 | 0.360          |
| 67922                               | 2510049119Rik | RIKEN cDNA 2510049119 gene                                             |                                                         | 72,642,093       | 0.167           | 74,188,285    | 5.3  | 0.221          |
| 56367                               | Scoc          | short coiled-coil protein                                              | 7                                                       | 84,364,127       | 0.187           | 76,763,519    | 6.4  | 0.226          |
| <b>Chromosome 9: 115.8-126.5 Mb</b> |               |                                                                        |                                                         |                  |                 |               |      |                |
| 56693                               | Crtap         | cartilage associated protein                                           | 20, 21, 23                                              | 116,758,246      | 0.852           | 122,116,668   | 6.0  | 0.184          |
| BB466497                            |               | RIKEN cDNA clone D230009F11                                            | 2, 3, 4, 5, 14, 16, 22, 27, 30, 31                      | 122,506,067      | 0.792           | 118,814,571   | 5.7  | 0.259          |
| 67115                               | Rpl14         | ribosomal protein L14                                                  |                                                         | 122,954,697      | 0.852           | 122,116,668   | 39.6 | 0.788          |
| <b>Chromosome 11: 62.0-76.0 Mb</b>  |               |                                                                        |                                                         |                  |                 |               |      |                |
| 14457                               | Gas7          | growth arrest specific 7                                               |                                                         | 66,999,284       | 0.347           | 79,241,794    | 4.7  | 0.141          |
| 83431                               | Ndel1         | nuclear distribution gene E-like homolog 1 ( <i>A. nidulans</i> )      |                                                         | 68,392,715       | 0.200           | 61,060,311    | 7.4  | 0.255          |
| 68964                               | 1500010J02Rik | RIKEN cDNA 1500010J02 gene                                             | 8, 9, 11, 21, 23                                        | 68,606,878       | 0.287           | 71,843,633    | 6.4  | 0.250          |
| 69215                               | Sat2          | spermidine/spermine N1-acetyl transferase 2                            |                                                         | 69,193,319       | 0.287           | 71,843,633    | 41.6 | 0.704          |
| 24070                               | Mpdu1         | mannose-P-dolichol utilization defect 1                                | 20                                                      | 69,227,971       | 0.287           | 71,843,633    | 10.2 | 0.347          |
| BF464122                            |               | UI-M-CG0p-bnx-a-05-0-UI.s1 NIH_BMAP_Ret4_S2 Mus musculus cDNA clone    |                                                         | 69,241,138       | 0.240           | 66,063,286    | 7.6  | 0.295          |
| 80886                               | Senp3         | SUMO/sentrin specific protease 3                                       | 13, 18                                                  | 69,244,385       | 0.267           | 69,377,580    | 8.0  | 0.249          |
| 77757                               | 9230111I22Rik | RIKEN cDNA 9230111I22 gene                                             | 2, 3, 5, 12, 14, 15, 16, 17, 24, 25, 26, 27, 28, 29, 31 | 69,337,261       | 0.267           | 69,377,580    | 8.3  | 0.240          |
| 11890                               | Asgr2         | asialoglycoprotein receptor 2                                          | 2, 10, 16                                               | 69,663,911       | 0.260           | 68,564,774    | 9.3  | 0.322          |
| 12029                               | Bcl6b         | B-cell CLL/lymphoma 6, member B                                        | 12                                                      | 69,795,395       | 0.240           | 66,063,286    | 4.7  | 0.147          |
| 104457                              | 0610010K14Rik | RIKEN cDNA 0610010K14 gene                                             |                                                         | 69,806,477       | 0.267           | 69,377,580    | 7.5  | 0.267          |
| 52898                               | D11Bwg0434e   | DNA segment, Chr 11, Brigham & Women's Genetics 0434 expressed         |                                                         | 69,809,393       | 0.307           | 74,309,687    | 17.4 | 0.626          |
| 66172                               | 1110030J09Rik | RIKEN cDNA 1110030J09 gene                                             |                                                         | 70,023,198       | 0.267           | 69,377,580    | 20.3 | 0.492          |
| 19175                               | Psmb6         | proteasome (prosome, macropain) subunit, beta type 6                   |                                                         | 70,096,667       | 0.267           | 69,377,580    | 10.8 | 0.310          |
| 70510                               | Rnf167        | ring finger protein 167                                                | 1, 6, 7, 8, 9, 11, 12, 14, 15, 16, 20, 21, 23, 24, 29   | 70,221,404       | 0.267           | 69,377,580    | 9.7  | 0.303          |
| 18643                               | Pfn1          | profilin 1                                                             |                                                         | 70,223,116       | 0.287           | 71,843,633    | 29.5 | 0.736          |
| 103712                              | 6330403K07Rik | RIKEN cDNA 6330403K07 gene                                             |                                                         | 70,603,216       | 0.267           | 69,377,580    | 23.4 | 0.537          |
| 67279                               | 3110004H13Rik | RIKEN cDNA 3110004H13 gene                                             |                                                         | 71,782,993       | 0.267           | 69,377,580    | 7.0  | 0.232          |

**Table 3. *Cis* -Regulated Genes in DBA blocks of C57BLKS/J**

| Genbank ID                         | Gene Symbol   | Full Gene Name                                                                              | Correlated Phenotype Code (See - Supp.Table 5)                | Gene Location bp | Morgan Location | eQTL Location | Lod  | r <sup>2</sup> |
|------------------------------------|---------------|---------------------------------------------------------------------------------------------|---------------------------------------------------------------|------------------|-----------------|---------------|------|----------------|
| 71522                              | 9030405D14Rik | RIKEN cDNA 9030405D14 gene                                                                  | 10, 22                                                        | 72,006,793       | 0.307           | 74,309,687    | 18.6 | 0.573          |
| 71495                              | 8430406H22Rik | RIKEN cDNA 8430406H22 gene                                                                  |                                                               | 72,180,646       | 0.260           | 68,564,774    | 6.4  | 0.216          |
| 18472                              | Pafah1b1      | platelet-activating factor acetylhydrolase, isoform 1b, beta1 subunit                       | 22                                                            | 74,245,221       | 0.387           | 84,173,900    | 8.0  | 0.285          |
| 18738                              | Pitpn         | phosphatidylinositol transfer protein                                                       | 2, 16                                                         | 75,159,374       | 0.307           | 74,309,687    | 19.2 | 0.538          |
| 22627                              | Ywhae         | tyrosine 3-monooxygenase/tryptophan 5-monooxygenase activation protein, epsilon polypeptide |                                                               | 75,304,205       | 0.267           | 69,377,580    | 6.2  | 0.184          |
| <b>Chromosome 12: 10.4-19.8 Mb</b> |               |                                                                                             |                                                               |                  |                 |               |      |                |
| 70619                              | 5730510P18Rik | RIKEN cDNA 5730510P18 gene                                                                  |                                                               | 13,254,130       | 0.000           | 3,520,027     | 23.8 | 0.517          |
| 14245                              | Lpin1         | lipin 1                                                                                     |                                                               | 16,930,916       | 0.060           | 15,536,538    | 22.3 | 0.605          |
| 50496                              | E2f6          | E2F transcription factor 6                                                                  |                                                               | 17,204,840       | 0.020           | 7,525,531     | 5.9  | 0.219          |
| 71853                              | Txndc7        | thioredoxin domain containing 7                                                             |                                                               | 17,659,137       | 0.040           | 11,531,035    | 12.7 | 0.439          |
| BE992406                           |               | UI-M-BZ1-beg-g-08-0-UI.s1 NIH_BMAP_MHI2_S1 Mus musculus cDNA clone                          |                                                               | 19,125,145       | 0.040           | 11,531,035    | 7.4  | 0.308          |
| 20135                              | Rrm2          | ribonucleotide reductase M2                                                                 | 6, 8, 9, 18, 22                                               | 19,155,671       | 0.080           | 19,542,042    | 13.9 | 0.495          |
| 77480                              | C330002I19Rik | RIKEN cDNA C330002I19 gene                                                                  |                                                               | 19,506,771       | 0.040           | 11,531,035    | 13.1 | 0.449          |
| 72877                              | 2900003A17Rik | RIKEN cDNA 2900003A17 gene                                                                  |                                                               | 19,509,495       | 0.040           | 11,531,035    | 32.5 | 0.762          |
| 15902                              | Idb2          | inhibitor of DNA binding 2                                                                  |                                                               | 19,542,044       | 0.040           | 11,531,035    | 5.1  | 0.206          |
| <b>Chromosome 12: 31.2-84.7 Mb</b> |               |                                                                                             |                                                               |                  |                 |               |      |                |
| 246196                             | Zfp277        | zinc finger protein 277                                                                     |                                                               | 35,174,591       | 0.140           | 31,558,554    | 28.5 | 0.610          |
| BB347868                           | Dock4         | RIKEN cDNA clone B930067K06                                                                 | 6, 18                                                         | 35,351,646       | 0.165           | 36,577,818    | 8.8  | 0.258          |
| 12632                              | Cfl2          | cofilin 2, muscle                                                                           | 19                                                            | 50,275,555       | 0.365           | 61,347,573    | 10.3 | 0.421          |
| 73385                              | 1700047I17Rik | RIKEN cDNA 1700047I17 gene                                                                  |                                                               | 50,466,305       | 0.265           | 48,962,695    | 6.1  | 0.217          |
| 24067                              | Srp54         | signal recognition particle 54                                                              |                                                               | 50,505,057       | 0.225           | 44,008,745    | 7.5  | 0.270          |
| 15375                              | Foxa1         | forkhead box A1                                                                             |                                                               | 52,888,408       | 0.245           | 46,485,720    | 9.5  | 0.408          |
| AI447953                           |               | cDNA clone IMAGE:597371                                                                     |                                                               | 53,077,036       | 0.245           | 46,485,720    | 5.0  | 0.221          |
| 73815                              | 4930404H11Rik | RIKEN cDNA 4930404H11 gene                                                                  | 7, 19                                                         | 67,439,117       | 0.385           | 63,824,548    | 26.0 | 0.606          |
| 66272                              | 1810020G14Rik | RIKEN cDNA 1810020G14 gene                                                                  | 7, 19, 28                                                     | 77,464,123       | 0.426           | 68,828,038    | 6.7  | 0.215          |
| <b>Chromosome 14: 3.3-27.8 Mb</b>  |               |                                                                                             |                                                               |                  |                 |               |      |                |
| 67053                              | Rpp14         | ribonuclease P 14kDa subunit (human)                                                        | 32                                                            | 3,365,872        | 0.060           | 15,467,190    | 22.0 | 0.686          |
| 68263                              | Pdhb          | pyruvate dehydrogenase (lipoamide) beta                                                     | 32                                                            | 3,450,639        | 0.040           | 12,951,449    | 18.0 | 0.599          |
| 71393                              | Kctd6         | potassium channel tetramerisation domain containing 6                                       | 15                                                            | 3,497,821        | 0.080           | 17,982,932    | 7.6  | 0.260          |
| 93732                              | Acox2         | acyl-Coenzyme A oxidase 2, branched chain                                                   |                                                               | 3,509,318        | 0.000           | 7,919,966     | 4.6  | 0.158          |
| 59007                              | Ngly1         | N-glycanase 1                                                                               | 2, 4, 5, 8, 9, 11, 12, 14, 16, 20, 21, 23, 24, 28, 29, 30, 31 | 11,524,171       | 0.040           | 12,951,449    | 6.5  | 0.232          |
| 21974                              | Top2b         | topoisomerase (DNA) II beta                                                                 |                                                               | 11,705,797       | 0.000           | 7,919,966     | 8.6  | 0.220          |
| AI987838                           | Thrb          | cDNA clone IMAGE:2182413                                                                    |                                                               | 13,295,392       | 0.000           | 7,919,966     | 20.2 | 0.572          |
| 69721                              | Nkiras1       | NFKB inhibitor interacting Ras-like protein 1                                               | 1, 15, 16, 20, 21, 23,                                        | 13,626,744       | 0.020           | 10,435,708    | 16.9 | 0.497          |
| 67725                              | Nudt13        | nudix (nucleoside diphosphate linked moiety X)-type motif 13                                | 2, 12, 24, 28, 30, 31                                         | 15,183,774       | 0.060           | 15,467,190    | 5.8  | 0.251          |
| 76633                              | 1700112E06Rik | RIKEN cDNA 1700112E06 gene                                                                  |                                                               | 17,856,134       | 0.000           | 7,919,966     | 4.7  | 0.153          |

**Table 3. *Cis* -Regulated Genes in DBA blocks of C57BLKS/J**

| Genbank ID                             | Gene Symbol   | Full Gene Name                                                                   | Correlated Phenotype Code (See - Supp.Table 5) | Gene Location bp | Morgan Location | eQTL Location | Lod  | r <sup>2</sup> |
|----------------------------------------|---------------|----------------------------------------------------------------------------------|------------------------------------------------|------------------|-----------------|---------------|------|----------------|
| <b>Chromosome 14: 109.1-114.2 Mb</b>   |               |                                                                                  |                                                |                  |                 |               |      |                |
| 105559                                 | Mbnl2         | muscleblind-like 2                                                               | 1, 15, 16, 24, 30                              | 113,537,686      | 0.836           | 110,438,629   | 9.3  | 0.232          |
| <b>Chromosome 17: 7.50 Kb -52.0 Mb</b> |               |                                                                                  |                                                |                  |                 |               |      |                |
| 70544                                  | 5730437N04Rik | RIKEN cDNA 5730437N04 gene                                                       |                                                | 3,851,009        | 0.020           | 13,252,729    | 6.2  | 0.242          |
| 66832                                  | Rshl2         | radial spokehead-like 2                                                          | 13                                             | 6,754,615        | 0.060           | 26,690,997    | 14.8 | 0.638          |
| 68195                                  | Rnaset2       | ribonuclease T2                                                                  | 2                                              | 7,332,423        | 0.020           | 13,252,729    | 7.1  | 0.234          |
| 50873                                  | Park2         | parkin                                                                           |                                                | 10,598,945       | 0.060           | 26,690,997    | 10.5 | 0.401          |
| 67045                                  | Riok2         | RIO kinase 2 (yeast)                                                             |                                                | 16,865,631       | 0.080           | 33,410,131    | 8.1  | 0.324          |
| 73706                                  | 2410085M17Rik | RIKEN cDNA 2410085M17 gene                                                       |                                                | 16,885,389       | 0.080           | 33,410,131    | 6.2  | 0.245          |
| 73233                                  | 3110048L19Rik | RIKEN cDNA 3110048L19 gene                                                       |                                                | 21,479,970       | 0.060           | 26,690,997    | 9.9  | 0.364          |
| 67673                                  | Tceb2         | transcription elongation factor B (SIII), polypeptide 2                          |                                                | 23,415,750       | 0.080           | 33,410,131    | 12.8 | 0.412          |
| 72016                                  | 1600002H07Rik | RIKEN cDNA 1600002H07 gene                                                       |                                                | 23,809,023       | 0.100           | 40,129,265    | 8.2  | 0.311          |
| 67078                                  | 1700012G19Rik | RIKEN cDNA 1700012G19 gene                                                       |                                                | 24,064,571       | 0.100           | 40,129,265    | 7.4  | 0.265          |
| 328779                                 |               | similar to heparan sulphate D-glucosaminyl 3-O-sulfotransferase-3B like          |                                                | 24,352,213       | 0.080           | 33,410,131    | 8.8  | 0.378          |
| 193838                                 |               | RIKEN cDNA clone:2810013J18; essential meiotic endonuclease 1 homolog (S. pombe) | 32                                             | 24,486,548       | 0.100           | 40,129,265    | 6.5  | 0.328          |
| 52009                                  | D17Ertd441e   | DNA segment, Chr 17, ERATO Doi 441, expressed                                    | 32                                             | 24,536,573       | 0.040           | 19,971,863    | 6.6  | 0.268          |
| 26373                                  | Clcn7         | chloride channel 7                                                               | 13, 17, 25, 26                                 | 24,755,400       | 0.080           | 33,410,131    | 11.6 | 0.413          |
| 75872                                  | 4930568E02Rik | RIKEN cDNA 4930568E02 gene                                                       |                                                | 24,778,173       | 0.020           | 13,252,729    | 4.7  | 0.242          |
| 68816                                  | Ppil1         | peptidylprolyl isomerase (cyclophilin)-like 1                                    |                                                | 28,881,765       | 0.100           | 40,129,265    | 18.3 | 0.641          |
| <b>Chromosome 18: 16.9-25.5 Mb</b>     |               |                                                                                  |                                                |                  |                 |               |      |                |
| 75964                                  | 5033403J15Rik | RIKEN cDNA 5033403J15 gene                                                       |                                                | 21,120,104       | 0.000           | 25,562,196    | 6.9  | 0.227          |
| 67664                                  | Rnf125        | ring finger protein 125                                                          |                                                | 21,268,476       | 0.000           | 25,562,196    | 6.7  | 0.189          |
| <b>Chromosome 19: 18.4-26.0 Mb</b>     |               |                                                                                  |                                                |                  |                 |               |      |                |
| BB382305                               | C230018N18Rik | RIKEN cDNA clone C230018N18                                                      |                                                | 22,849,252       | 0.120           | 26,363,331    | 13.2 | 0.743          |
| 70273                                  | 2310051E17Rik | RIKEN cDNA 2310051E17 gene                                                       | 8, 9, 11, 21                                   | 23,312,833       | 0.100           | 25,110,261    | 5.0  | 0.267          |
| 72810                                  | 2810455D13Rik | RIKEN cDNA 2810455D13 gene                                                       |                                                | 23,870,727       | 0.020           | 20,097,982    | 22.6 | 0.582          |
| 74146                                  | Dock8         | dedicator of cytokinesis 8                                                       |                                                | 24,849,477       | 0.000           | 18,844,912    | 4.8  | 0.169          |
