# Supplementary material
Source: HighWire-hosted journal article supplement (https://diabetes.diabetesjournals.org/content/suppl/2007/03/09/54.4.1191)
Supplement: pg1191DavisSupplementaryTable5.pdf [file pg1191DavisSupplementaryTable5.pdf]

**Table 5: Phenotype Code Definitions**

| <u>Code</u> | <u>Phenotype Name</u> | <u>Phenotype Description</u>                          |
|-------------|-----------------------|-------------------------------------------------------|
| 1           | an                    | Total body length                                     |
| 2           | bmi                   | Body mass index                                       |
| 3           | epipa                 | Epididymal/parimetrial fat pad weight                 |
| 4           | fatbw                 | Adiposity(fat pad mass/body weight)                   |
| 5           | ftpsum                | Fat pad mass (sum of fat pads)                        |
| 6           | hfffa                 | Plasma free fatty acid (high-fat diet)                |
| 7           | hfhdl                 | Plasma HDL level (high-fat diet)                      |
| 8           | hfldlv                | Plasma LDL and VLDL level (high-fat diet)             |
| 9           | hftcho                | Plasma total cholesterol level (high-fat diet)        |
| 10          | hftg                  | Plasma triglyceride level (high-fat diet)             |
| 11          | hfuc                  | Plasma unesterified cholesterol level (high-fat diet) |
| 12          | ins                   | Plasma insulin (high-fat diet)                        |
| 13          | laorles               | Log aortic lesion area                                |
| 14          | lep                   | Plasma leptin (high-fat diet)                         |
| 15          | lipfus                | lipofuscin in lesions                                 |
| 16          | livebwt               | Body weight (high-fat diet)                           |
| 17          | logftpsum             | Log of fat pad mass (high-fat diet)                   |
| 18          | loghfffa              | Log of plasma free fatty acid (high-fat diet)         |
| 19          | loghfhdl              | Log of plasma HDL level (high-fat diet)               |
| 20          | loghfldlv             | Log of plasma LDL and VLDL level                      |
| 21          | loghftcho             | Log of plasma total cholesterol level                 |
| 22          | loghftg               | Log of plasma Triglyceride level (high-fat diet)      |
| 23          | loghfuc               | Log of plasma unesterified cholesterol                |
| 24          | logins                | Log of plasma insulin (high-fat diet)                 |
| 25          | logomen               | Log of mesenteric fat pad weight(high-fat diet)       |
| 26          | logsubc               | Log of subcutaneous fat pad weight                    |
| 27          | omen                  | Mesenteric fat pad weight (high-fat diet)             |
| 28          | retrog                | Retroperitoneal fat weight                            |
| 29          | sqrtlep               | Square root of plasma leptin (high-fat diet)          |
| 30          | sqrtretrog            | Square root of retroperitoneal fat weight             |
| 31          | subc                  | Subcutaneous fat pad weight (high-fat diet)           |
| 32          | xvaca                 | Myocardial lesion calcification (high-fat diet)       |
